# Supplementary material for: Ni(ii)-catalyzed C–H hydroarylation of diarylacetylenes with imidazolium salts
Source: Royal Society of Chemistry journal article supplement (doi:10.1039/d1cc07309e), 2022-01-01

# *Supporting Information*

## **Ni(II)-catalyzed C–H hydroarylation of diarylacetylenes with imidazolium salts**

Tianbao Wang, Xuesong Zheng, Qinze Zheng, Fulin Zhou, Linhua Wang and Ge

Gao\*

*Key Laboratory of Green Chemistry and Technology of Ministry of Education, College of Chemistry,  
Sichuan University, 29 Wangjiang Road, Chengdu 610064, P. R. China*

\*E-mails: gg2b@scu.edu.cn

### **Table of Contents**

|      |                                                                                                     |     |
|------|-----------------------------------------------------------------------------------------------------|-----|
| I.   | General Remarks.....                                                                                | S1  |
| II.  | Optimization of the Reaction Conditions.....                                                        | S1  |
| III. | General Procedures .....                                                                            | S2  |
| IV.  | Characterization of New Compounds .....                                                             | S4  |
| V.   | Single Crystal X-Ray Crystallographic Data .....                                                    | S17 |
| VI.  | References.....                                                                                     | S19 |
| VII. | Copies of <sup>1</sup> H, <sup>1</sup> H- <sup>1</sup> H NOESY and <sup>13</sup> C NMR Spectra..... | S21 |

## I. General Remarks

All commercial available reagents were used without further purification unless otherwise noted. Ni(OAc)<sub>2</sub>·4H<sub>2</sub>O (> 98.0%), NaOAc and DMSO were purchased from Chengdu Chron Chemicals (China) CO., Ltd. KOAc, <sup>n</sup>Bu<sub>3</sub>P and styrene were purchased from Energy Chemical (China) CO., Ltd.. Analytical thin layer chromatography was performed on HG/T2354-92 GF254 plates (Qingdao Haiyang Chemical Co., Ltd.). The imidazolium salts substrates<sup>1</sup> and diarylacetylene derivatives<sup>2</sup> were prepared according to the literature procedures.

NMR spectroscopy were obtained on a Bruker AV II-400 MHz or Agilent 400-MR DD2 spectrometer. The <sup>1</sup>H NMR (400 MHz) chemical shifts were recorded relative to CDCl<sub>3</sub> or DMSO-*d*<sub>6</sub> as the internal reference (CDCl<sub>3</sub>: δ = 7.26 ppm; DMSO-*d*<sub>6</sub>: δ = 2.50 ppm). The <sup>13</sup>C NMR (100 MHz) chemical shifts were given using CDCl<sub>3</sub> or DMSO-*d*<sub>6</sub> as the internal standard (CDCl<sub>3</sub>: δ = 77.16 ppm; DMSO-*d*<sub>6</sub>: δ = 39.52 ppm). High resolution mass spectra (HR-MS) were measured on a Waters-Q-TOF-Premier (ESI).

## II. Optimization of the Reaction Conditions

A Schlenk tube with a magnetic stirring bar was charged with 1,3-dimethyl-1*H*-benzo[*d*]imidazol-3-ium **1a** (54.8 mg, 0.2 mmol), diphenylacetylene **2a** (53.4 mg, 0.3 mmol), a catalyst (10 mol%), a base (0.4 mmol), and solvent (1 mL) under N<sub>2</sub>. The reaction mixture was heated at 100 °C or 120 °C for 12 h. After the reaction was complete, the solvent was removed under reduced pressure. The residue was purified by column chromatography on silica gel with CH<sub>2</sub>Cl<sub>2</sub>/MeOH (v/v, 40/1–20/1) to provide product **3a**.

Table S1. Optimization of the Reaction Conditions<sup>a</sup>

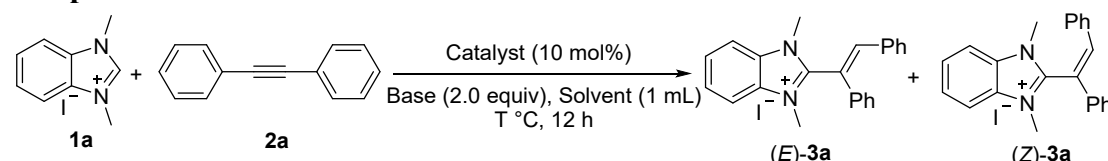

| Entry | Catalysts                               | Bases | Solvents | Temperatur | Yield <sup>b</sup> | <i>E/Z</i> |
|-------|-----------------------------------------|-------|----------|------------|--------------------|------------|
| 1     | Ni(OAc) <sub>2</sub> ·4H <sub>2</sub> O | NaOAc | DCE      | 120 °C     | ND                 | --         |
| 2     | Ni(OAc) <sub>2</sub> ·4H <sub>2</sub> O | NaOAc | DMF      | 120 °C     | 69%                | 8/1        |
| 3     | Ni(OAc) <sub>2</sub> ·4H <sub>2</sub> O | NaOAc | Dioxane  | 120 °C     | ND                 | --         |

|                 |                                            |                                |                  |               |            |             |
|-----------------|--------------------------------------------|--------------------------------|------------------|---------------|------------|-------------|
| 4               | Ni(OAc) <sub>2</sub> ·4H <sub>2</sub> O    | NaOAc                          | THF              | 120 °C        | ND         | --          |
| 5               | Ni(OAc) <sub>2</sub> ·4H <sub>2</sub> O    | NaOAc                          | Toluene          | 120 °C        | ND         | --          |
| 6               | Ni(OAc) <sub>2</sub> ·4H <sub>2</sub> O    | NaOAc                          | DMSO             | 120 °C        | 86%        | 9/1         |
| 7               | Ni(OAc) <sub>2</sub> ·4H <sub>2</sub> O    | NaOAc                          | <i>t</i> -amylOH | 120 °C        | ND         | --          |
| 8               | Ni(OAc) <sub>2</sub> ·4H <sub>2</sub> O    | NaOAc                          | MeCN             | 120 °C        | ND         | --          |
| 9               | Ni(OAc) <sub>2</sub> ·4H <sub>2</sub> O    | K <sub>2</sub> CO <sub>3</sub> | DMSO             | 120 °C        | 46%        | 8/1         |
| 10              | Ni(OAc) <sub>2</sub> ·4H <sub>2</sub> O    | KOAc                           | DMSO             | 120 °C        | 91%        | 12/1        |
| 11              | Ni(OAc) <sub>2</sub> ·4H <sub>2</sub> O    | K <sub>3</sub> PO <sub>4</sub> | DMSO             | 120 °C        | 95%        | 5/1         |
| 12              | Ni(OAc) <sub>2</sub> ·4H <sub>2</sub> O    | <i>t</i> -BuOK                 | DMSO             | 120 °C        | trace      | --          |
| 13              | Ni(OAc) <sub>2</sub> ·4H <sub>2</sub> O    | CsOAc                          | DMSO             | 120 °C        | 57%        | 13/1        |
| 14              | Ni(OAc) <sub>2</sub>                       | KOAc                           | DMSO             | 120 °C        | 94%        | 12/1        |
| 15              | NiBr <sub>2</sub>                          | KOAc                           | DMSO             | 120 °C        | 87%        | 11/1        |
| 16              | Ni(acac) <sub>2</sub>                      | KOAc                           | DMSO             | 120 °C        | 76%        | 14/1        |
| 17              | Ni(Cp) <sub>2</sub>                        | KOAc                           | DMSO             | 120 °C        | 70%        | 9/1         |
| 18              | Ni(OAc) <sub>2</sub> ·4H <sub>2</sub> O    | KOAc                           | DMSO             | 80 °C         | 95%        | 9/1         |
| <b>19</b>       | <b>Ni(OAc)<sub>2</sub>·4H<sub>2</sub>O</b> | <b>KOAc</b>                    | <b>DMSO</b>      | <b>100 °C</b> | <b>95%</b> | <b>12/1</b> |
| 20              | Ni(OAc) <sub>2</sub> ·4H <sub>2</sub> O    | KOAc                           | DMSO             | 140 °C        | 61%        | 13/1        |
| 21 <sup>c</sup> | Ni(OAc) <sub>2</sub> ·4H <sub>2</sub> O    | KOAc                           | DMSO             | 100 °C        | 59%        | 10/1        |
| 22 <sup>d</sup> | Ni(OAc) <sub>2</sub> ·4H <sub>2</sub> O    | KOAc                           | DMSO             | 100 °C        | trace      | --          |

<sup>a</sup>Reaction conditions: **1a** (54.8 mg, 0.2 mmol), **2a** (53.4 mg, 0.3 mmol), a catalyst (10 mol%), a base (0.4 mmol) and solvent (1.0 mL) at T °C for 12 h under N<sub>2</sub>. <sup>b</sup>Isolated yield. <sup>c</sup>Ni(OAc)<sub>2</sub>·4H<sub>2</sub>O (5 mol%). <sup>d</sup>Ni(OAc)<sub>2</sub>·4H<sub>2</sub>O (1 mol%). ND = not detected.

### III. General Procedures

#### a) General procedure for the Ni-catalyzed alkenylation of **1** with **2**

A Schlenk tube with a magnetic stirring bar was charged with an imidazolium salt **1** (0.2 mmol), a diarylacetylene **2** (0.3 mmol), Ni(OAc)<sub>2</sub>·4H<sub>2</sub>O (5.0 mg, 10 mol%), KOAc (39.2 mg, 0.4 mmol) and DMSO (1 mL) under N<sub>2</sub>. The reaction mixture was then heated at 100-140 °C for 12 or 24 h. After the reaction was complete, DMSO was removed under reduced pressure. The residue was purified by column chromatography on silica gel with CH<sub>2</sub>Cl<sub>2</sub>/MeOH (v/v, 40/1–20/1) to provide product **3** and **4**.

#### b) Procedure for the Ni-catalyzed alkylation of **1a** with styrene

A Schlenk tube with a magnetic stirring bar was charged with *N,N*-dialkyl benzoimidazolium salts **1a** (54.8 mg, 0.2 mmol), styrene (69.0 μL, 0.6 mmol), Ni(OAc)<sub>2</sub>·4H<sub>2</sub>O (5.0 mg, 10 mol%), NaOAc (32.8 mg, 0.4 mmol) and DMSO (1 mL) under N<sub>2</sub>. The reaction mixture was then heated at 120 °C for 24 h. After the reaction was complete, DMSO was removed under reduced pressure. The residue was purified by column chromatography on silica gel with CH<sub>2</sub>Cl<sub>2</sub>/MeOH (v/v, 30/1–25/1) to provide product **9**.

### c) General procedure for the synthesis of **6** and **7**

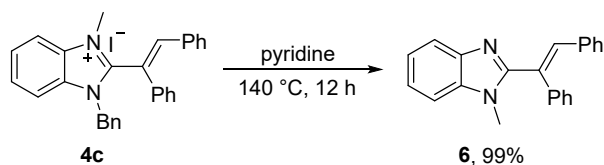

(1) A Schlenk tube with a magnetic stirring bar was charged with **4c** (105.6 mg, 0.2 mmol) and pyridine (1 mL) in air. The reaction mixture was heated at 140 °C for 12 h. After the reaction was complete, the mixture was diluted with 10 mL of CH<sub>2</sub>Cl<sub>2</sub>, filtered through a celite pad, and washed with 10-20 mL of CH<sub>2</sub>Cl<sub>2</sub>. The combined organic extracts were concentrated and the resulting residue was purified by column chromatography on silica gel with PE/EA (v/v = 3/1) to provide 2-(1,2-diphenylvinyl)-1-methylbenzimidazole **6** in 99% yield.

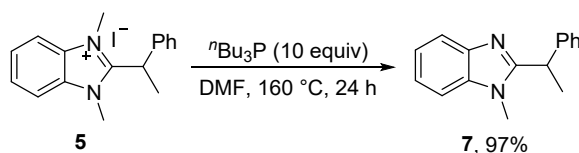

(2) A Schlenk tube with a magnetic stirring bar was charged with **5** (75.6 mg, 0.2 mmol), tributyl phosphine (495.3 μL, 2.0 mmol) and DMF (1 mL) under N<sub>2</sub>. The reaction mixture was heated at 160 °C for 24 h. After the reaction was complete, the mixture was diluted with 10 mL of CH<sub>2</sub>Cl<sub>2</sub>, filtered through a celite pad, and washed with 10-20 mL of CH<sub>2</sub>Cl<sub>2</sub>. The combined organic extracts were concentrated and the resulting residue was purified by column chromatography on silica gel with PE/EA (v/v = 3/1) to afford 1-methyl-2-(1-phenylethyl)benzimidazole **7** in 97% yield.

### d) Synthesis of the tricarbene coordinated Ni(II) complex **8**

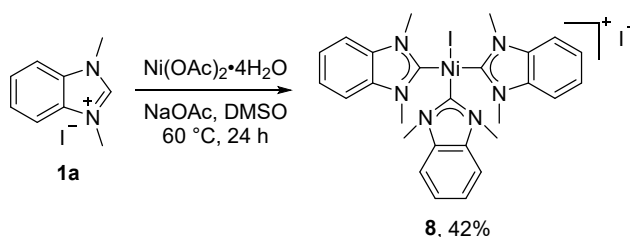

A Schlenk tube with a magnetic stirring bar was charged with 1,3-dimethyl-1*H*-benzo[*d*]imidazol-3-ium **1a** (54.8 mg, 0.2 mmol), Ni(OAc)<sub>2</sub>·4H<sub>2</sub>O (5.0 mg, 0.01 mmol), NaOAc (32.8 mg, 0.4 mmol) and DMSO (1 mL) under N<sub>2</sub>. The reaction mixture was then heated at 60 °C for 24 h. After the reaction was cooled down to room temperature, DMSO was removed under reduced pressure. The residue was purified by column chromatography on silica gel with CH<sub>2</sub>Cl<sub>2</sub>/MeOH (v/v, 50/1–30/1) to provide **8** as an orange solid (6.4 mg, 42% yield). Compound **8** in CDCl<sub>3</sub> gradually

decomposes in air.  $^1\text{H}$  NMR (400 MHz,  $\text{CDCl}_3$ ):  $\delta = 7.45\text{-}7.43$  (m, 2H), 7.40-7.37 (m, 4H), 7.31-7.27 (m, 6H), 4.49 (s, 12H), 4.44 (s, 6H) ppm.  $^{13}\text{C}$  NMR (100 MHz,  $\text{CDCl}_3$ ):  $\delta = 182.9, 179.6, 135.6, 135.0, 124.3, 123.7, 110.7, 110.2, 37.4, 36.9$  ppm. HRMS (ESI<sup>+</sup>): calcd for  $\text{C}_{27}\text{H}_{33}\text{IN}_6\text{Ni}^+$   $[\text{M}-\text{I}]^+$  623.0930, found 623.0922.

**e) Reaction of the tricarbene coordinated Ni(II) complex **8** with diphenylacetylene **2a****

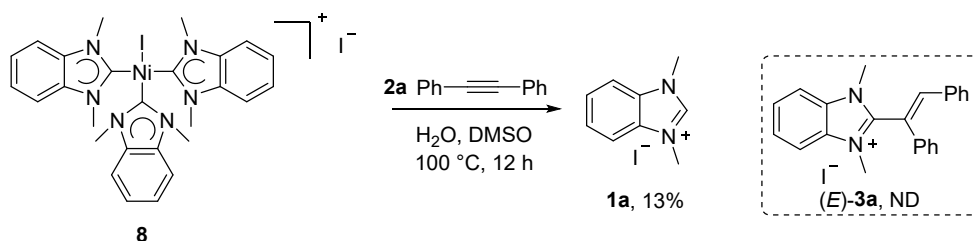

A flame dried Schlenk tube with a magnetic stirring bar was charged with **8** (32.0 mg, 0.043 mmol), **2a** (22.7 mg, 0.13 mmol),  $\text{H}_2\text{O}$  (3.8  $\mu\text{L}$ , 0.22 mmol) and DMSO (0.5 mL) under  $\text{N}_2$ . The reaction mixture was then heated at 100  $^\circ\text{C}$  for 12 h. After the reaction was cooled down to room temperature, DMSO was removed under reduced pressure. The residue was purified by column chromatography on silica gel with  $\text{CH}_2\text{Cl}_2/\text{MeOH}$  (v/v, 40/1–10/1) to provide **1a** as a light yellow solid (3.0 mg, 13% yield). (*E*)-**3a** was not detected.

**f) Experiments to detect the Ni–H intermediate**

A flame dried Schlenk tube with a magnetic stirring bar was charged with **1a** (27.4 mg, 0.1 mmol), **2a** (26.7 mg, 0.15 mmol),  $\text{Ni}(\text{OAc})_2 \cdot 4\text{H}_2\text{O}$  (25.0 mg, 0.1 mmol) and KOAc (19.2 mg, 0.2 mmol) in  $\text{DMSO-}d_6$  (0.5 mL) under  $\text{N}_2$ . The reaction mixture was then heated at 100  $^\circ\text{C}$  for 15 minutes. After cooling to room temperature, the mixture was filtered in the glove box. The filtrate was sealed in a NMR tube and directly subjected to  $^1\text{H}$  NMR analysis. No characteristic signal of the Ni–H was detected.

**IV. Characterization of New Compounds**

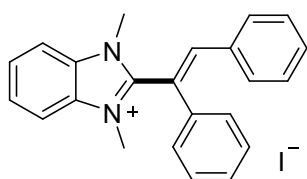

**(E)-2-(1,2-diphenylvinyl)-1,3-dimethyl-1H-benzo[d]imidazol-3-ium iodide (**3a**):**

Purification via column chromatography on silica gel ( $\text{DCM}/\text{MeOH} = 30/1$ , v/v) afforded **3a** as a

white solid of inseparable *E/Z* isomers (85.8 mg, 95% yield). By  $^1\text{H}$  NMR, the *E:Z* ratio was determined to be approximately 12:1.  $^1\text{H}$  NMR (400 MHz,  $\text{DMSO-}d_6$ ):  $\delta = 8.21$  (s, 1H), 8.09-8.05 (m, 2H), 7.80-7.76 (m, 2H), 7.50 (br, 5H), 7.36 (t,  $J = 7.2$  Hz, 1H), 7.30 (t,  $J = 7.2$  Hz, 2H), 7.03 (d,  $J = 7.2$  Hz, 2H), 3.71 (s, 6H) ppm.  $^{13}\text{C}$  NMR (100 MHz,  $\text{CDCl}_3$ ):  $\delta = 149.1, 141.9, 134.9, 133.4, 131.7, 130.9, 130.5, 130.3, 130.0, 128.4, 128.1, 126.1, 121.5, 114.2, 34.1$  ppm. HRMS ( $\text{ESI}^+$ ): calcd for  $\text{C}_{23}\text{H}_{21}\text{N}_2^+ [\text{M-I}^-]^+$  325.1699, found 325.1696.

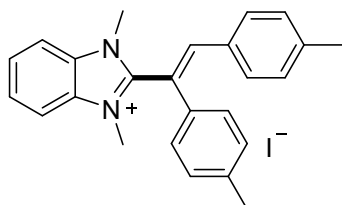

**(*E*)-2-(1,2-di-*p*-tolylvinyl)-1,3-dimethyl-1*H*-benzo[*d*]imidazol-3-ium iodide (3b):**

Purification via column chromatography on silica gel ( $\text{DCM/MeOH} = 30/1$ , v/v) afforded **3b** as an offwhite solid of inseparable *E/Z* isomers (80.7 mg, 84% yield). By  $^1\text{H}$  NMR, the *E:Z* ratio was determined to be more than 20:1.  $^1\text{H}$  NMR (400 MHz,  $\text{DMSO-}d_6$ ):  $\delta = 8.10$  (s, 1H), 8.09-8.06 (m, 2H), 7.79-7.77 (m, 2H), 7.36 (d,  $J = 8.4$  Hz, 2H), 7.29 (d,  $J = 8.0$  Hz, 2H), 7.10 (d,  $J = 8.0$  Hz, 2H), 6.88 (d,  $J = 8.0$  Hz, 2H), 3.71 (s, 6H), 2.36 (s, 3H), 2.25 (s, 3H) ppm.  $^{13}\text{C}$  NMR (100 MHz,  $\text{DMSO-}d_6$ ):  $\delta = 149.0, 140.5, 139.9, 139.3, 132.7, 131.7, 131.4, 130.1, 129.9, 128.2, 127.1, 126.2, 119.9, 113.9, 32.5, 20.9, 20.8$  ppm. HRMS ( $\text{ESI}^+$ ): calcd for  $\text{C}_{25}\text{H}_{25}\text{N}_2^+ [\text{M-I}^-]^+$  353.2012, found 353.2012.

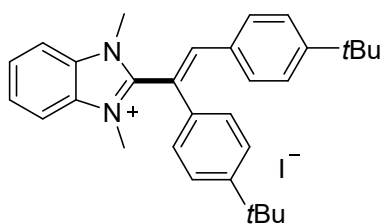

**(*E*)-2-(1,2-bis(4-(*tert*-butyl)phenyl)vinyl)-1,3-dimethyl-1*H*-benzo[*d*]imidazol-3-ium iodide (3c):**

Purification via column chromatography on silica gel ( $\text{DCM/MeOH} = 30/1$ , v/v) afforded **3c** as a white solid of inseparable *E/Z* isomers (107.2 mg, 95% yield). By  $^1\text{H}$  NMR, the *E:Z* ratio was determined to be more than 20:1.  $^1\text{H}$  NMR (400 MHz,  $\text{DMSO-}d_6$ ):  $\delta = 8.12$ -8.09 (m, 3H), 7.81-7.79 (m, 2H), 7.48 (d,  $J = 8.4$  Hz, 2H), 7.38 (d,  $J = 8.0$  Hz, 2H), 7.32 (d,  $J = 8.0$  Hz, 2H), 6.91 (d,  $J = 8.0$  Hz, 2H), 3.76 (s, 6H), 1.30 (s, 9H), 1.20 (s, 9H) ppm.  $^{13}\text{C}$  NMR (100 MHz,  $\text{DMSO-}d_6$ ):  $\delta = 153.0, 152.2, 149.0, 140.1, 132.7, 131.8, 131.1, 128.2, 127.2, 126.3, 126.2, 125.8, 119.1, 114.0, 34.6, 34.5, 32.4, 30.9, 30.8$  ppm. HRMS ( $\text{ESI}^+$ ): calcd for  $\text{C}_{31}\text{H}_{37}\text{N}_2^+ [\text{M-I}^-]^+$  437.2951, found 437.2951.

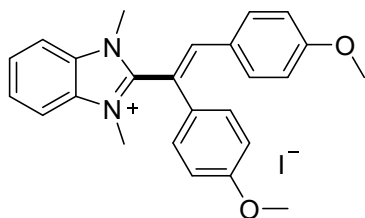

**(E)-2-(1,2-bis(4-methoxyphenyl)vinyl)-1,3-dimethyl-1H-benzo[d]imidazol-3-ium iodide (3d):**

Purification via column chromatography on silica gel (DCM/MeOH = 30/1, v/v) afforded **3d** as a yellow solid of inseparable *E/Z* isomers (92.1 mg, 90% yield). By  $^1\text{H}$  NMR, the *E:Z* ratio was determined to be more than 20:1.  $^1\text{H}$  NMR (400 MHz,  $\text{CDCl}_3$ ):  $\delta$  = 8.07-8.02 (m, 2H), 7.75-7.71 (m, 2H), 7.68 (s, 1H), 7.19-7.15 (m, 2H), 6.97-6.95 (m, 2H), 6.80-6.75 (m, 4H), 3.84 (s, 6H), 3.82 (s, 3H), 3.75 (s, 3H) ppm.  $^{13}\text{C}$  NMR (100 MHz,  $\text{CDCl}_3$ ):  $\delta$  = 161.2, 161.0, 149.9, 139.4, 131.8, 129.8, 128.2, 127.7, 127.5, 126.2, 118.4, 115.6, 115.4, 114.1, 55.8, 55.6, 33.9 ppm. HRMS (ESI<sup>+</sup>): calcd for  $\text{C}_{25}\text{H}_{25}\text{N}_2\text{O}_2^+ [\text{M}-\text{I}^-]^+$  385.1911, found 385.1911.

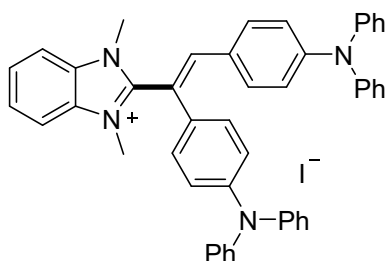

**(E)-2-(1,2-bis(4-(diphenylamino)phenyl)vinyl)-1,3-dimethyl-1H-benzo[d]imidazol-3-ium iodide (3e):**

Purification via column chromatography on silica gel (DCM/MeOH = 30/1, v/v) afforded **3e** as a yellow solid of inseparable *E/Z* isomers (103.8 mg, 66% yield). By  $^1\text{H}$  NMR, the *E:Z* ratio was determined to be approximately 9:1.  $^1\text{H}$  NMR (400 MHz,  $\text{DMSO}-d_6$ ):  $\delta$  = 8.07-8.04 (m, 2H), 7.90 (s, 1H), 7.75-7.73 (m, 2H), 7.37-7.32 (m, 7H), 7.30-7.27 (m, 3H), 7.14-7.11 (m, 3H), 7.09-7.06 (m, 5H), 7.04-7.01 (m, 4H), 6.93 (d,  $J$  = 9.2 Hz, 2H), 6.80 (d,  $J$  = 8.8 Hz, 2H), 6.70 (d,  $J$  = 8.8 Hz, 2H), 3.76 (s, 6H) ppm.  $^{13}\text{C}$  NMR (100 MHz,  $\text{DMSO}-d_6$ ):  $\delta$  = 149.2, 148.5, 148.0, 146.4, 146.0, 138.4, 131.8, 129.8, 129.8, 129.6, 128.9, 127.1, 126.9, 126.6, 125.3, 124.8, 124.5, 124.0, 122.0, 120.5, 117.1, 113.9, 32.4 ppm. HRMS (ESI<sup>+</sup>): calcd for  $\text{C}_{47}\text{H}_{39}\text{N}_4^+ [\text{M}-\text{I}^-]^+$  659.3169, found 659.3169.

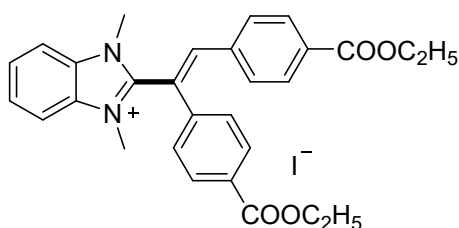

**(E)-2-(1,2-bis(4-(ethoxycarbonyl)phenyl)vinyl)-1,3-dimethyl-1H-benzo[d]imidazol-3-ium iodide (3f):**

Purification via column chromatography on silica gel (DCM/MeOH = 30/1, v/v) afforded **3f** as a yellow solid of inseparable *E/Z* isomers (52 mg, 55% yield). By <sup>1</sup>H NMR, the *E:Z* ratio was determined to be more than 20:1. <sup>1</sup>H NMR (400 MHz, DMSO-*d*<sub>6</sub>): δ = 8.45 (s, 1H), 8.09-8.07 (m, 2H), 8.03 (d, *J* = 8.0 Hz, 2H), 7.85 (d, *J* = 8.0 Hz, 2H), 7.81-7.79 (m, 2H), 7.69 (d, *J* = 8.0, Hz 2H), 7.22 (d, *J* = 7.6 Hz, 2H), 4.34 (d, *J* = 6.8 Hz, 2H), 4.26 (q, *J* = 6.8 Hz, 2H), 3.73 (s, 6H), 1.33 (t, *J* = 6.8 Hz, 3H), 1.27 (t, *J* = 6.8 Hz, 3H) ppm. <sup>13</sup>C NMR (100 MHz, DMSO-*d*<sub>6</sub>): δ = 165.1, 164.9, 147.5, 142.8, 139.4, 138.2, 131.9, 130.8, 130.7, 130.1, 129.9, 128.8, 127.3, 127.0, 121.9, 114.1, 61.1, 32.6, 14.2, 14.1 ppm. HRMS (ESI<sup>+</sup>): calcd for C<sub>29</sub>H<sub>29</sub>N<sub>2</sub>O<sub>4</sub><sup>+</sup> [M-I<sup>-</sup>]<sup>+</sup> 469.2122, found 469.2118.

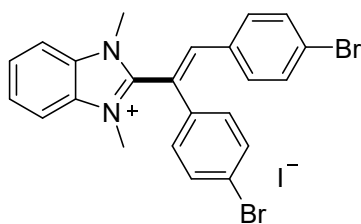

**(*E*)-2-(1,2-bis(4-bromophenyl)vinyl)-1,3-dimethyl-1*H*-benzo[*d*]imidazol-3-ium iodide (3g):**

Purification via column chromatography on silica gel (DCM/MeOH = 30/1, v/v) afforded **3g** as a white solid of inseparable *E/Z* isomers (55.9 mg, 46% yield). By <sup>1</sup>H NMR, the *E:Z* ratio was determined to be more than 20:1. <sup>1</sup>H NMR (400 MHz, DMSO-*d*<sub>6</sub>): δ = 8.22 (s, 1H), 8.09-8.07 (m, 2H), 7.80-7.77 (m, 2H), 7.68 (d, *J* = 8.4 Hz, 2H), 7.52-7.46 (m, 4H), 6.99 (d, *J* = 8.4, Hz, 2H), 3.73 (s, 6H) ppm. <sup>13</sup>C NMR (100 MHz, DMSO-*d*<sub>6</sub>): δ = 147.7, 141.3, 134.5, 133.1, 132.4, 132.3, 131.9, 130.4, 128.6, 127.2, 123.7, 123.2, 120.4, 114.0, 32.6 ppm. HRMS (ESI<sup>+</sup>): calcd for C<sub>23</sub>H<sub>19</sub>Br<sub>2</sub>N<sub>2</sub><sup>+</sup> [M-I<sup>-</sup>]<sup>+</sup> 482.9889, 480.9910, found 482.9891, 480.9912.

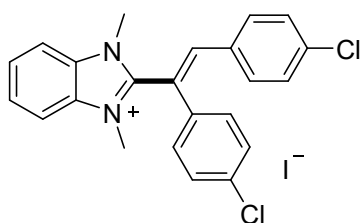

**(*E*)-2-(1,2-bis(4-chlorophenyl)vinyl)-1,3-dimethyl-1*H*-benzo[*d*]imidazol-3-ium iodide (3h):**

Purification via column chromatography on silica gel (DCM/MeOH = 30/1, v/v) afforded **3h** as a white solid of inseparable *E/Z* isomers (80.1 mg, 77% yield). By <sup>1</sup>H NMR, the *E:Z* ratio was determined to be more than 20:1. <sup>1</sup>H NMR (400 MHz, DMSO-*d*<sub>6</sub>): δ = 8.22 (s, 1H), 8.08-8.06 (m, 2H), 7.79-7.77 (m, 2H), 7.57-7.52 (m, 4H), 7.38 (d, *J* = 8.8 Hz, 2H), 7.06 (d, *J* = 8.8 Hz, 2H), 3.72 (s, 6H) ppm. <sup>13</sup>C NMR (100 MHz, DMSO-*d*<sub>6</sub>): δ = 147.8, 141.2, 134.8, 134.4, 134.2, 132.8, 131.9, 130.2, 129.5, 129.4, 128.4, 127.2, 120.3, 114.0, 32.6 ppm. HRMS (ESI<sup>+</sup>): calcd for C<sub>23</sub>H<sub>19</sub>Cl<sub>2</sub>N<sub>2</sub><sup>+</sup> [M-I<sup>-</sup>]<sup>+</sup> 393.0920, found 393.0924.



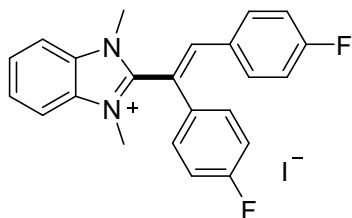

**(E)-2-(1,2-bis(4-fluorophenyl)vinyl)-1,3-dimethyl-1H-benzo[d]imidazol-3-ium iodide (3i):**

Purification via column chromatography on silica gel (DCM/MeOH = 30/1, v/v) afforded **3i** as a pale yellow solid of inseparable *E/Z* isomers (84.9 mg, 87% yield). By  $^1\text{H}$  NMR, the *E:Z* ratio was determined to be approximately 8:1.  $^1\text{H}$  NMR (400 MHz, DMSO- $d_6$ ):  $\delta$  = 8.16 (s, 1H), 8.08-8.06 (m, 2H), 7.79-7.77 (m, 2H), 7.59-7.55 (m, 2H), 7.34 (t,  $J$  = 8.8 Hz, 2H), 7.19-7.08 (m, 4H), 3.93 (s, 6H) ppm.  $^{13}\text{C}$  NMR (100 MHz, DMSO- $d_6$ ):  $\delta$  = 162.7 (d,  $J_{CF}$  = 246.5 Hz), 162.6 (d,  $J_{CF}$  = 247.9 Hz), 148.2, 140.8, 132.0 (d,  $J_{CF}$  = 3.1 Hz), 131.8, 130.8 (d,  $J_{CF}$  = 8.6 Hz), 130.6 (d,  $J_{CF}$  = 3.2 Hz), 128.9 (d,  $J_{CF}$  = 8.6 Hz), 127.1, 119.8 (d,  $J_{CF}$  = 1.6 Hz), 116.5 (d,  $J_{CF}$  = 21.7 Hz), 116.4 (d,  $J_{CF}$  = 21.8 Hz), 113.9, 32.5 ppm. HRMS (ESI $^+$ ): calcd for  $\text{C}_{23}\text{H}_{19}\text{F}_2\text{N}_2^+$  [ $\text{M}-\text{I}^-$ ] $^+$  361.1511, found 361.1506.

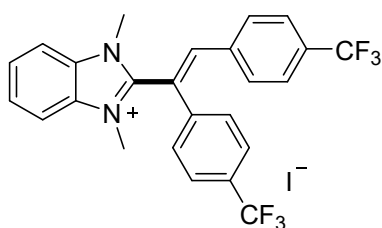

**(E)-2-(1,2-bis(4-(trifluoromethyl)phenyl)vinyl)-1,3-dimethyl-1H-benzo[d]imidazol-3-ium iodide (3j):**

Purification via column chromatography on silica gel (DCM/MeOH = 30/1, v/v) afforded **3j** as a yellow solid of inseparable *E/Z* isomers (80.4 mg, 68% yield). By  $^1\text{H}$  NMR, the *E:Z* ratio was determined to be approximately 16:1.  $^1\text{H}$  NMR (400 MHz, DMSO- $d_6$ ):  $\delta$  = 8.46 (s, 1H), 8.10-8.08 (m, 2H), 7.87 (d,  $J$  = 8.4 Hz, 2H), 7.81-7.77 (m, 4H), 7.69 (d,  $J$  = 8.4 Hz, 2H), 7.30 (d,  $J$  = 8.4 Hz, 2H), 3.75 (s, 6H) ppm.  $^{13}\text{C}$  NMR (100 MHz, DMSO- $d_6$ ):  $\delta$  = 147.2, 142.8, 139.0 (d,  $J_{CF}$  = 1.3 Hz), 137.6 (d,  $J_{CF}$  = 0.9 Hz), 131.9, 129.9 (d,  $J_{CF}$  = 31.8 Hz), 129.8 (d,  $J_{CF}$  = 31.9 Hz), 129.4, 127.6, 127.3, 126.4 (q,  $J_{CF}$  = 3.6 Hz), 126.2 (q,  $J_{CF}$  = 3.8 Hz), 124.0 (d,  $J_{CF}$  = 270.8 Hz), 123.8 (d,  $J_{CF}$  = 270.9 Hz), 121.6, 114.1, 32.7 ppm. HRMS (ESI $^+$ ): calcd for  $\text{C}_{25}\text{H}_{19}\text{F}_6\text{N}_2^+$  [ $\text{M}-\text{I}^-$ ] $^+$  461.1447, found 461.1443.

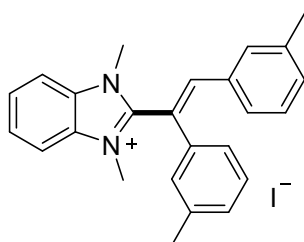

**(E)-2-(1,2-di-*m*-tolylvinyl)-1,3-dimethyl-1*H*-benzo[*d*]imidazol-3-ium iodide (3k):**

Purification via column chromatography on silica gel (DCM/MeOH = 30/1, v/v) afforded **3k** as a white solid of inseparable *E/Z* isomers (84 mg, 87% yield). By <sup>1</sup>H NMR, the *E:Z* ratio was determined to be approximately 15:1. <sup>1</sup>H NMR (400 MHz, DMSO-*d*<sub>6</sub>): δ = 8.14 (s, 1H), 8.09-8.06 (m, 2H), 7.81-7.77 (m, 2H), 7.37 (t, *J* = 8.0 Hz, 2H), 7.30 (d, *J* = 7.6 Hz, 1H), 7.26 (d, *J* = 7.6 Hz, 1H), 7.18-7.11 (m, 2H), 6.87 (s, 1H), 6.64 (d, *J* = 7.6 Hz, 1H), 3.71 (s, 6H), 2.34 (s, 3H), 2.12 (s, 3H) ppm. <sup>13</sup>C NMR (100 MHz, DMSO-*d*<sub>6</sub>): δ = 148.9, 141.4, 139.0, 138.5, 135.3, 134.1, 131.7, 130.7, 130.4, 129.4, 129.3, 129.2, 127.1, 126.7, 124.6, 123.5, 121.0, 113.9, 32.5, 21.0, 20.8 ppm. HRMS (ESI<sup>+</sup>): calcd for C<sub>25</sub>H<sub>25</sub>N<sub>2</sub><sup>+</sup> [M-I<sup>-</sup>]<sup>+</sup> 353.2012, found 353.2013.

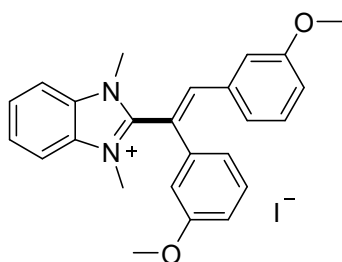

**(E)-2-(1,2-bis(3-methoxyphenyl)vinyl)-1,3-dimethyl-1*H*-benzo[*d*]imidazol-3-ium iodide (3l):**

Purification via column chromatography on silica gel (DCM/MeOH = 30/1, v/v) afforded **3l** as a light yellow solid of inseparable *E/Z* isomers (82.3 mg, 80% yield). By <sup>1</sup>H NMR, the *E:Z* ratio was determined to be approximately 15:1. <sup>1</sup>H NMR (400 MHz, CDCl<sub>3</sub>): δ = 8.11-8.07 (m, 2H), 7.89 (s, 1H), 7.76-7.72 (m, 2H), 7.36 (t, *J* = 8.0 Hz, 1H), 7.14 (t, *J* = 8.0 Hz, 1H), 6.98 (dd, *J* = 8.4 Hz, *J* = 2.4 Hz, 1H), 6.86-6.83 (m, 2H), 6.71 (dd, *J* = 7.6 Hz, *J* = 1.2 Hz, 1H), 6.48 (t, *J* = 2.0 Hz, 1H), 6.31 (d, *J* = 7.6 Hz, 1H), 3.863-3.857 (m, 9H), 3.59 (s, 3H) ppm. <sup>13</sup>C NMR (100 MHz, CDCl<sub>3</sub>): δ = 160.8, 160.3, 149.2, 142.0, 136.2, 134.7, 131.7, 131.4, 131.1, 128.4, 121.4, 119.7, 118.5, 116.6, 115.5, 114.2, 113.8, 112.0, 56.0, 55.5, 34.1 ppm. HRMS (ESI<sup>+</sup>): calcd for C<sub>25</sub>H<sub>25</sub>N<sub>2</sub>O<sub>2</sub><sup>+</sup> [M-I<sup>-</sup>]<sup>+</sup> 385.1911, found 385.1910.

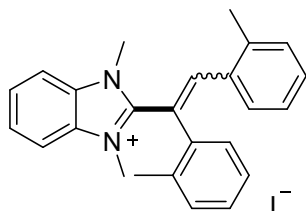

**2-(1,2-di-*o*-tolylvinyl)-1,3-dimethyl-1*H*-benzo[*d*]imidazol-3-ium iodide (3m):**

Purification via column chromatography on silica gel (DCM/MeOH = 30/1, v/v) afforded **3m** as a light yellow solid of inseparable *E/Z* isomers (70 mg, 73% yield). By <sup>1</sup>H NMR, the *E:Z* ratio was determined to be approximately 1:1. <sup>1</sup>H NMR (400 MHz, DMSO-*d*<sub>6</sub>): δ = 8.10-8.07 (m, 1H), 7.99-7.97 (m, 1H), 7.96 (s, 0.59H, for (*Z*)-**3m**), 7.77 (s, 0.58H, for (*E*)-**3m**), 7.76-7.74 (m, 1H), 7.73-7.70

(m, 1H), 7.43-7.38 (m, 2H), 7.36-7.31 (m, 2.35H), 7.29-7.24 (m, 1.55H), 7.22-7.20 (m, 1H), 6.97 (t,  $J = 8.0$  Hz, 0.66H), 6.89 (t,  $J = 7.6$  Hz, 0.67H), 6.84 (d,  $J = 7.6$  Hz, 0.58H), 6.60 (d,  $J = 7.6$  Hz, 0.60H), 3.90 (s, 3H, for (*Z*)-**3m**), 3.58 (s, 3H, for (*E*)-**3m**), 2.49 (s, 1.54H), 2.38 (s, 1.50H), 2.16 (s, 1.56H), 1.87 (s, 1.50H) ppm.  $^{13}\text{C}$  NMR (100 MHz, DMSO- $d_6$ ):  $\delta = 150.8, 149.3, 145.8, 144.6, 137.8, 137.7, 136.3, 136.0, 135.5, 133.8, 133.7, 132.9, 131.8, 131.7, 131.38, 131.42, 130.9, 130.7, 130.5, 130.3, 130.2, 129.7, 129.5, 128.5, 127.2, 127.1, 127.0, 126.8, 126.5, 125.6, 122.1, 121.6, 113.7, 113.5, 32.9, 32.5, 19.74, 19.71, 19.69, 19.2$  ppm. HRMS (ESI $^+$ ): calcd for  $\text{C}_{25}\text{H}_{25}\text{N}_2^+$  [ $\text{M}-\text{I}^-$ ] $^+$  353.2012, found 353.2016.

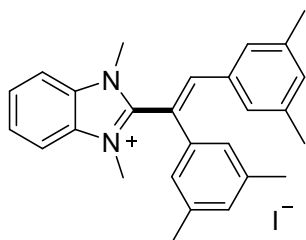

**(*E*)-2-(1,2-bis(3,5-dimethylphenyl)vinyl)-1,3-dimethyl-1H-benzo[d]imidazol-3-ium iodide (**3n**):**

Purification via column chromatography on silica gel (DCM/MeOH = 30/1, v/v) afforded **3n** as an offwhite solid of inseparable *E/Z* isomers (87.2 mg, 86% yield). By  $^1\text{H}$  NMR, the *E:Z* ratio was determined to be approximately 16:1.  $^1\text{H}$  NMR (400 MHz,  $\text{CDCl}_3$ ):  $\delta = 8.17-8.14$  (m, 2H), 7.75-7.72 (m, 3H), 7.07 (s, 1H), 6.93 (s, 1H), 6.82(s, 2H), 6.31 (s, 2H), 3.84 (s, 6H), 2.32 (s, 6H), 2.05 (s, 6H) ppm.  $^{13}\text{C}$  NMR (100 MHz,  $\text{CDCl}_3$ ):  $\delta = 149.6, 141.6, 140.1, 139.5, 135.0, 133.6, 132.6, 132.3, 131.6, 128.3, 125.6, 123.7, 121.4, 114.2, 34.2, 21.5, 21.3$  ppm. HRMS (ESI $^+$ ): calcd for  $\text{C}_{27}\text{H}_{29}\text{N}_2^+$  [ $\text{M}-\text{I}^-$ ] $^+$  381.2325, found 381.2320.

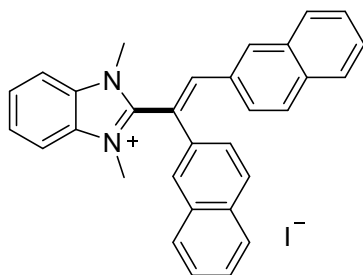

**(*E*)-2-(1,2-di(naphthalen-2-yl)vinyl)-1,3-dimethyl-1H-benzo[d]imidazol-3-ium iodide (**3o**):**

Purification via column chromatography on silica gel (DCM/MeOH = 30/1, v/v) afforded **3o** as a brown solid of inseparable *E/Z* isomers (93.4 mg, 85% yield). By  $^1\text{H}$  NMR, the *E:Z* ratio was determined to be approximately 12:1.  $^1\text{H}$  NMR (400 MHz, DMSO- $d_6$ ):  $\delta = 8.53$  (s, 1H), 8.12-8.09 (m, 3H), 8.01 (d,  $J = 7.6$  Hz, 1H), 7.93-7.88 (m, 4H), 7.83-7.77 (m, 5H), 7.62-7.51 (m, 4H), 6.87 (dd,  $J = 8.8$  Hz,  $J = 2.0$  Hz, 1H), 3.78 (s, 6H) ppm.  $^{13}\text{C}$  NMR (100 MHz, DMSO- $d_6$ ):  $\delta = 148.8, 141.7, 133.08, 133.07, 133.0, 132.8, 132.7, 131.9, 131.6, 129.5, 129.3, 129.0, 128.5, 128.4, 127.7, 127.3, 127.2, 127.1, 127.0, 126.0, 123.9, 123.7, 123.4, 121.1, 114.0, 32.6$  ppm. HRMS (ESI $^+$ ): calcd for

$C_{31}H_{25}N_2^+ [M-I^-]^+$  425.2012, found 425.2007.

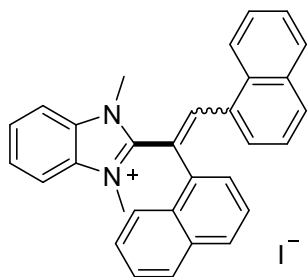

**2-(1,2-di(naphthalen-1-yl)vinyl)-1,3-dimethyl-1H-benzo[d]imidazol-3-ium iodide (3p):**

Purification via column chromatography on silica gel (DCM/MeOH = 30/1, v/v) afforded **3p** as a yellow solid of inseparable *E/Z* isomers (100.8 mg, 91% yield). By  $^1H$  NMR, the *E:Z* ratio was determined to be approximately 1:1.4  $^1H$  NMR (400 MHz,  $CDCl_3$ ):  $\delta$  = 9.06 (s, 0.55H, for (*Z*)-**3p**), 8.86 (d,  $J$  = 8.8 Hz, 0.6H), 8.50 (s, 0.45H, for (*E*)-**3p**), 8.12-8.09 (m, 0.55H), 8.02-7.98(m, 1.48H), 7.94-7.87 (m, 2.52H), 7.82-7.77 (m, 1.47H), 7.74-7.72 (m, 1H), 7.68-7.50 (m, 7.47H), 7.43 (t,  $J$  = 8.4 Hz, 1.23H), 7.36-7.30 (m, 1.72H), 7.12-7.08 (m, 1H), 6.99 (d,  $J$  = 7.2 Hz, 0.6H), 6.91 (t,  $J$  = 7.6 Hz, 0.65H), 3.98 (s, 3.5H, for (*Z*)-**3p**), 3.71 (s, 2.5H, for (*E*)-**3p**) ppm.  $^{13}C$  NMR (100 MHz,  $CDCl_3$ ):  $\delta$  = 151.7, 149.8, 147.9, 146.4, 134.6, 134.0, 133.8, 133.6, 132.8, 132.3, 131.84, 131.78, 131.7, 131.2, 130.8, 130.67, 130.66, 130.6, 129.80, 129.78, 129.5, 129.2, 129.1, 128.7, 128.4, 128.21, 128.19, 128.1, 127.9, 127.8, 127.5, 127.4, 127.2, 126.7, 126.6, 126.3, 125.9, 125.79, 125.76, 124.6, 124.0, 123.1, 123.1, 122.0, 120.6, 114.0, 113.3, 34.3, 34.0 ppm. HRMS (ESI $^+$ ): calcd for  $C_{31}H_{25}N_2^+$   $[M-I^-]^+$  425.2012, found 425.2007.

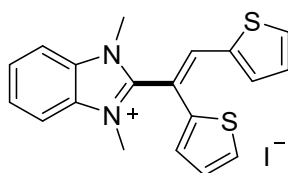

**(E)-2-(1,2-di(thiophen-2-yl)vinyl)-1,3-dimethyl-1H-benzo[d]imidazol-3-ium iodide (3q):**

Purification via column chromatography on silica gel (DCM/MeOH = 30/1, v/v) afforded **3q** as a brown solid of inseparable *E/Z* isomers (76.6 mg, 83% yield). By  $^1H$  NMR, the *E:Z* ratio was determined to be more than 20:1.  $^1H$  NMR (400 MHz,  $DMSO-d_6$ ):  $\delta$  = 8.25 (s, 1H), 8.22-8.20 (m, 2H), 7.87-7.85 (m, 2H), 7.75 (d,  $J$  = 4.8 Hz, 1H), 7.63 (t,  $J$  = 4.8 Hz, 1H), 7.56 (d,  $J$  = 3.2 Hz, 1H), 7.15 (t,  $J$  = 4.8 Hz, 1H), 7.10 (t,  $J$  = 5.2 Hz, 1H), 6.97 (d,  $J$  = 3.2 Hz, 1H), 3.93 (s, 6H) ppm.  $^{13}C$  NMR (100 MHz,  $DMSO-d_6$ ):  $\delta$  = 146.0, 138.5, 136.0, 134.6, 132.2, 131.4, 129.9, 128.8, 128.6, 128.1, 127.6, 114.2, 111.3, 32.4 ppm. HRMS (ESI $^+$ ): calcd for  $C_{19}H_{17}N_2S_2^+$   $[M-I^-]^+$  337.0828, found 337.0824.

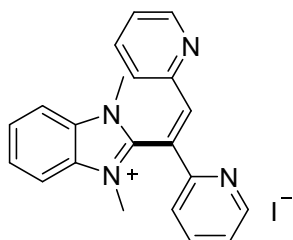

**(Z)-2-(1,2-di(pyridin-2-yl)vinyl)-1,3-dimethyl-1H-benzo[d]imidazol-3-ium iodide (3r):**

Purification via column chromatography on silica gel (DCM/MeOH = 30/1, v/v) afforded **3r** as a brown solid (51.3 mg, 56% yield). By  $^1\text{H}$  NMR, the *Z*:*E* ratio was determined to be more than 20:1.  $^1\text{H}$  NMR (400 MHz, DMSO- $d_6$ ):  $\delta$  = 8.68 (s, 1H), 8.51 (d,  $J$  = 4.8 Hz, 1H), 8.29 (d,  $J$  = 8.0 Hz, 1H), 8.12-8.04 (m, 3H), 8.00-7.91 (m, 3H), 7.78-7.74 (m, 2H), 7.48 (dd,  $J$  = 7.2 Hz,  $J$  = 4.8 Hz, 1H), 7.32-7.28 (m, 1H), 3.73 (s, 6H) ppm.  $^{13}\text{C}$  NMR (100 MHz,  $\text{CDCl}_3$ ):  $\delta$  = 152.9, 152.6, 151.0, 150.1, 149.7, 140.1, 138.3, 137.8, 131.9, 128.9, 126.8, 124.7, 124.3, 122.9, 122.0, 113.0, 32.4 ppm. HRMS (ESI $^+$ ): calcd for  $\text{C}_{21}\text{H}_{19}\text{N}_4^+$  [ $\text{M}-\text{I}^-$ ] $^+$  327.1604, found 327.1601.

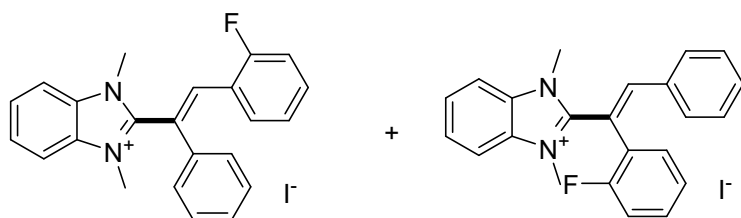

**(E)-2-(2-(2-fluorophenyl)-1-phenylvinyl)-1,3-dimethyl-1H-benzo[d]imidazol-3-ium iodide (3s) and (E)-2-(1-(2-fluorophenyl)-2-phenylvinyl)-1,3-dimethyl-1H-benzo[d]imidazol-3-ium iodide (3s'):**

Purification via column chromatography on silica gel (DCM/MeOH = 30/1, v/v) afforded **3s** and **3s'** as a light yellow solid of inseparable mixture (78.0 mg, 83% yield). By  $^1\text{H}$  NMR, the **3s**: **3s'** ratio was determined to be 1.3:1.  $^1\text{H}$  NMR (400 MHz,  $\text{CDCl}_3$ ):  $\delta$  = 3.86 (s, 3.36H, for **3s**), 3.87 (s, 2.63H, for **3s'**), 6.96-7.02 (m, 2H), 7.33-7.43 (m, 4H), 7.50-7.52 (m, 2H), 7.72-7.78 (m, 3H), 7.88 (s, 0.59H, for **3s**), 7.89 (s, 0.45H, for **3s'**), 7.98-8.03 (m, 2H) ppm. HRMS (ESI $^+$ ): calcd for  $\text{C}_{23}\text{H}_{20}\text{FN}_2^+$  [ $\text{M}-\text{I}^-$ ] $^+$  343.1605, found 343.1611.

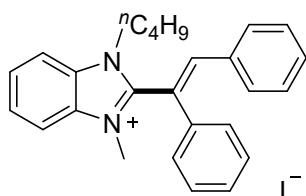

**(E)-1-butyl-2-(1,2-diphenylvinyl)-3-methyl-1H-benzo[d]imidazol-3-ium iodide (4a):**

Purification via column chromatography on silica gel (DCM/MeOH = 30/1, v/v) afforded **4a** as a white solid of inseparable *E*/*Z* isomers (90.9 mg, 92% yield). By  $^1\text{H}$  NMR, the *E*:*Z* ratio was determined to be approximately 7:1.  $^1\text{H}$  NMR (400 MHz, DMSO- $d_6$ ):  $\delta$  = 8.18 (s, 1H), 8.16-8.13 (m,

1H), 8.12-8.09 (m, 1H), 7.79-7.77 (m, 2H), 7.50 (br, 5H), 7.37-7.30 (m, 3H), 7.01 (d,  $J = 7.2$  Hz, 2H), 4.21-4.14 (m, 2H), 3.77 (s, 3H), 1.35-1.29 (m, 2H), 1.15-1.08 (m, 2H), 0.62 (t,  $J = 7.2$  Hz, 3H), ppm.  $^{13}\text{C}$  NMR (100 MHz,  $\text{CDCl}_3$ ):  $\delta = 148.5, 141.4, 135.2, 133.3, 131.9, 131.1, 131.0, 130.5, 130.2, 130.0, 128.4, 128.3, 128.2, 126.2, 121.4, 114.9, 113.9, 47.2, 34.3, 30.8, 20.0, 13.5$  ppm. HRMS (ESI<sup>+</sup>): calcd for  $\text{C}_{26}\text{H}_{27}\text{N}_2^+ [\text{M}-\text{I}^-]^+$  367.2169, found 367.2164.

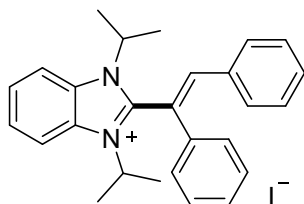

**(E)-2-(1,2-diphenylvinyl)-1,3-diisopropyl-1H-benzo[d]imidazol-3-ium iodide (4b):**

Purification via column chromatography on silica gel (DCM/MeOH = 30/1, v/v) afforded **4b** as a white solid of inseparable *E/Z* isomers (78.3 mg, 77% yield). By  $^1\text{H}$  NMR, the *E:Z* ratio was determined to be approximately 10:1.  $^1\text{H}$  NMR (400 MHz,  $\text{DMSO}-d_6$ ):  $\delta = 8.39$ -8.37 (m, 2H), 8.22 (s, 1H), 7.76-7.74 (m, 2H), 7.49 (br, 5H), 7.39-7.36 (m, 3H), 7.01-6.99 (m, 2H), 4.80-4.73 (m, 2H), 1.44 (d,  $J = 7.2$  Hz, 6H), 1.28 (d,  $J = 6.8$  Hz, 6H) ppm.  $^{13}\text{C}$  NMR (100 MHz,  $\text{DMSO}-d_6$ ):  $\delta = 147.0, 140.7, 135.7, 133.8, 130.3, 130.1, 129.8, 129.6, 129.4, 128.6, 126.9, 126.3, 121.3, 116.1, 52.6, 20.3, 19.6$  ppm. HRMS (ESI<sup>+</sup>): calcd for  $\text{C}_{27}\text{H}_{29}\text{N}_2^+ [\text{M}-\text{I}^-]^+$  381.2325, found 381.2326.

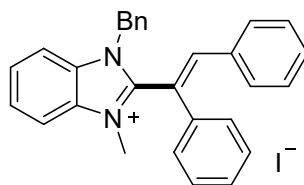

**(E)-1-benzyl-2-(1,2-diphenylvinyl)-3-methyl-1H-benzo[d]imidazol-3-ium bromide (4c):**

Purification via column chromatography on silica gel (DCM/MeOH = 30/1, v/v) afforded **4c** as a white solid of inseparable *E/Z* isomers (73.9 mg, 70% yield). By  $^1\text{H}$  NMR, the *E:Z* ratio was determined to be approximately 7:1.  $^1\text{H}$  NMR (400 MHz,  $\text{DMSO}-d_6$ ):  $\delta = 8.17$  (s, 1H), 8.13 (d,  $J = 8.4$ , 1H), 8.05 (d,  $J = 7.6$  Hz, 1H), 7.81-7.75 (m, 2H), 7.49-7.42 (m, 4H), 7.34 (t,  $J = 7.2$  Hz, 2H), 7.25 (t,  $J = 7.2$  Hz, 3H), 7.19 (d,  $J = 7.6$  Hz, 2H), 7.06 (d,  $J = 7.2$  Hz, 2H), 6.88 (d,  $J = 8.0$  Hz, 2H), 5.56 (d,  $J = 16.0$  Hz, 1H), 5.37 (d,  $J = 15.6$  Hz, 1H), 3.76 (s, 3H) ppm.  $^{13}\text{C}$  NMR (100 MHz,  $\text{DMSO}-d_6$ ):  $\delta = 148.9, 141.9, 135.3, 133.9, 133.1, 132.1, 131.3, 130.2, 129.7, 129.4, 129.3, 128.8, 128.6, 128.2, 127.9, 127.6, 127.3, 126.6, 120.8, 114.5, 114.2, 49.4, 32.6$  ppm. HRMS (ESI<sup>+</sup>): calcd for  $\text{C}_{29}\text{H}_{25}\text{N}_2^+ [\text{M}-\text{Br}^-]^+$  401.2012, found 401.2020.

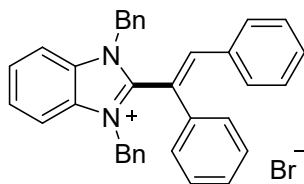

**(E)-1,3-dibenzyl-2-(1,2-diphenylvinyl)-1H-benzo[d]imidazol-3-ium bromide (4d):**

Purification via column chromatography on silica gel (DCM/MeOH = 30/1, v/v) afforded **4d** as a white solid of inseparable *E/Z* isomers (59.2 mg, 53% yield). By <sup>1</sup>H NMR, the *E:Z* ratio was determined to be approximately 8:1. <sup>1</sup>H NMR (400 MHz, CDCl<sub>3</sub>): δ = 8.11-8.09 (m, 2H), 7.85 (s, 1H), 7.71-7.69 (m, 2H), 7.39-7.37 (m, 2H), 7.33-7.29 (m, 2H), 7.21-7.09 (m, 14H), 6.71 (d, *J* = 7.6 Hz, 2H), 5.65 (d, *J* = 15.6 Hz, 2H), 5.38 (d, *J* = 15.6 Hz, 2H) ppm. <sup>13</sup>C NMR (100 MHz, CDCl<sub>3</sub>): δ = 149.2, 141.6, 135.0, 133.1, 132.2, 131.8, 130.9, 130.5, 130.1, 129.9, 129.31, 129.28, 128.5, 128.40, 128.36, 126.3, 121.8, 115.1, 50.9 ppm. HRMS (ESI<sup>+</sup>): calcd for C<sub>35</sub>H<sub>29</sub>N<sub>2</sub><sup>+</sup> [M-Br<sup>-</sup>]<sup>+</sup> 477.2325, found 477.2326.

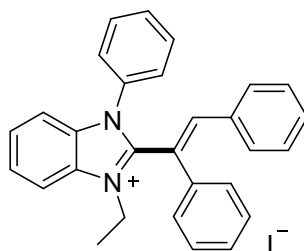

**(E)-2-(1,2-diphenylvinyl)-3-ethyl-1-phenyl-1H-benzo[d]imidazol-3-ium iodide (4e):**

Purification via column chromatography on silica gel (DCM/MeOH = 30/1, v/v) afforded **4e** as a light purple solid of inseparable *E/Z* isomers (94 mg, 89% yield). By <sup>1</sup>H NMR, the *E:Z* ratio was determined to be approximately 5:1. <sup>1</sup>H NMR (400 MHz, DMSO-*d*<sub>6</sub>): δ = 8.32 (d, *J* = 8.4 Hz, 1H), 7.90 (s, 1H), 7.86 (t, *J* = 7.6 Hz, 1H), 7.76 (t, *J* = 7.6 Hz, 1H), 7.62-7.49 (m, 5H), 7.46-7.38 (m, 6H), 7.30 (t, *J* = 7.6 Hz, 2H), 7.08-7.06 (m, 1H), 6.90 (d, *J* = 7.6 Hz, 2H), 4.42 (q, *J* = 7.2 Hz, 2H), 1.24 (t, *J* = 7.2 Hz, 3H) ppm. <sup>13</sup>C NMR (100 MHz, DMSO-*d*<sub>6</sub>): δ = 148.3, 141.4, 136.0, 133.9, 132.6, 131.6, 131.0, 130.7, 130.2, 129.9, 129.6, 129.3, 128.5, 128.1, 127.7, 126.8, 125.8, 121.0, 114.5, 113.8, 42.2, 13.5 ppm. HRMS (ESI<sup>+</sup>): calcd for C<sub>29</sub>H<sub>25</sub>N<sub>2</sub><sup>+</sup> [M-I<sup>-</sup>]<sup>+</sup> 401.2012, found 401.2012.

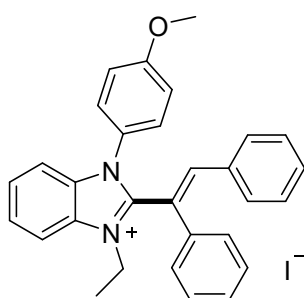

**(E)-2-(1,2-diphenylvinyl)-3-ethyl-1-(4-methoxyphenyl)-1H-benzo[d]imidazol-3-ium iodide (4f):**

Purification via column chromatography on silica gel (DCM/MeOH = 30/1, v/v) afforded **4f** as a white solid of inseparable *E/Z* isomers (96 mg, 86% yield). By <sup>1</sup>H NMR, the *E:Z* ratio was determined to be approximately 3:1. <sup>1</sup>H NMR (400 MHz, DMSO-*d*<sub>6</sub>): δ = 8.29 (d, *J* = 8.4 Hz, 1H), 7.91 (s, 1H), 7.85 (t, *J* = 7.6 Hz, 1H), 7.75 (t, *J* = 7.6 Hz, 1H), 7.58-7.57 (m, 2H), 7.52 (d, *J* = 8.0 Hz, 1H), 7.46-7.44 (m, 3H), 7.32 (t, *J* = 7.6 Hz, 3H), 7.07 (d, *J* = 8.4 Hz, 1H), 6.93-6.90 (m, 5H), 4.41 (q, *J* = 7.2 Hz, 2H), 3.75 (s, 3H), 1.23 (t, *J* = 7.2 Hz, 3H) ppm. <sup>13</sup>C NMR (100 MHz, DMSO-*d*<sub>6</sub>): δ = 160.5, 148.5, 141.1, 136.0, 134.0, 133.0, 130.9, 130.2, 129.6, 129.4, 128.6, 128.0, 127.6, 127.3, 126.7, 124.1, 121.1, 115.0, 114.4, 113.9, 55.7, 42.2, 13.5 ppm. HRMS (ESI<sup>+</sup>): calcd for C<sub>30</sub>H<sub>27</sub>N<sub>2</sub>O<sup>+</sup> [M-I<sup>-</sup>]<sup>+</sup> 431.2118, found 431.2119.

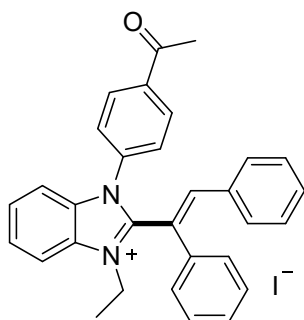

**(*E*)-1-(4-acetylphenyl)-2-(1,2-diphenylvinyl)-3-ethyl-1*H*-benzo[*d*]imidazol-3-ium iodide (4g):**

Purification via column chromatography on silica gel (DCM/MeOH = 30/1, v/v) afforded **4g** as a light yellow solid of inseparable *E/Z* isomers (34 mg, 30% yield). By <sup>1</sup>H NMR, the *E:Z* ratio was determined to be approximately 3:1. <sup>1</sup>H NMR (400 MHz, DMSO-*d*<sub>6</sub>): δ = 8.33 (d, *J* = 8.4 Hz, 1H), 7.94 (d, *J* = 8.8 Hz, 2H), 7.89 (s, 1H), 7.80-7.74 (m, 2H), 7.66-7.58 (m, 3H), 7.49-7.45 (m, 3H), 7.42-7.38 (m, 1H), 7.32-7.27 (m, 3H), 7.08-7.06 (m, 1H), 6.87 (d, *J* = 7.6 Hz, 2H), 4.43 (q, *J* = 7.2 Hz, 2H), 2.58 (s, 3H), 1.25 (t, *J* = 7.2 Hz, 3H) ppm. <sup>13</sup>C NMR (100 MHz, DMSO-*d*<sub>6</sub>): δ = 197.1, 148.2, 141.9, 137.9, 135.9, 135.2, 133.9, 132.4, 131.1, 130.3, 129.7, 129.6, 129.38, 129.35, 128.5, 128.2, 127.8, 126.9, 126.3, 120.9, 114.6, 113.8, 42.4, 27.0, 13.4 ppm. HRMS (ESI<sup>+</sup>): calcd for C<sub>31</sub>H<sub>27</sub>N<sub>2</sub>O<sup>+</sup> [M-I<sup>-</sup>]<sup>+</sup> 443.2118, found 443.2110.

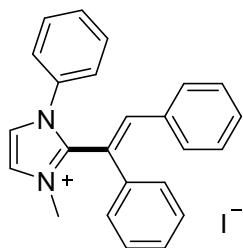

**(*E*)-2-(1,2-diphenylvinyl)-3-methyl-1-phenyl-1*H*-imidazol-3-ium iodide (4h):**

Purification via column chromatography on silica gel (DCM/MeOH = 30/1, v/v) afforded **4h** as a gray solid of inseparable *E/Z* isomers (53 mg, 57% yield). By <sup>1</sup>H NMR, the *E:Z* ratio was determined to be more than 20:1. <sup>1</sup>H NMR (400 MHz, DMSO-*d*<sub>6</sub>): δ = 8.27 (s, 1H), 8.23 (s, 1H), 7.81 (s, 1H),



7.44-7.39 (m, 7H), 7.36-7.30 (m, 4H), 6.98 (d,  $J = 8.0$  Hz, 2H), 6.80 (d,  $J = 7.6$  Hz, 2H), 3.61 (s, 3H) ppm.  $^{13}\text{C}$  NMR (100 MHz, DMSO- $d_6$ ):  $\delta = 142.5, 140.4, 135.8, 134.2, 134.2, 130.1, 129.8, 129.5, 129.4, 129.2, 128.1, 126.2, 125.2, 124.2, 121.2, 35.7$  ppm. HRMS (ESI $^+$ ): calcd for  $\text{C}_{24}\text{H}_{21}\text{N}_2^+$   $[\text{M}-\text{I}^-]^+$  337.1699, found 337.1694.

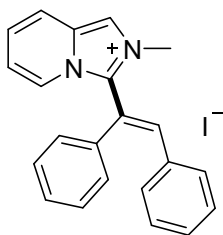

**(*E*)-3-(1,2-diphenylvinyl)-2-methylimidazo[1,5-*a*]pyridin-2-ium iodide (4i):**

Purification via column chromatography on silica gel (DCM/MeOH = 30/1, v/v) afforded **4i** as a brown solid of inseparable *E/Z* isomers (50.5 mg, 58% yield). By  $^1\text{H}$  NMR, the *E:Z* ratio was determined to be more than 20:1.  $^1\text{H}$  NMR (400 MHz, DMSO- $d_6$ ):  $\delta = 8.49$  (s, 1H), 8.11 (s, 1H), 8.01 (d,  $J = 9.2$  Hz, 1H), 7.92 (d,  $J = 7.2$  Hz, 1H), 7.48-7.40 (m, 5H), 7.30-7.23 (m, 4H), 7.04 (t,  $J = 6.8$  Hz, 1H), 6.84 (d,  $J = 6.8$  Hz, 2H), 3.78 (s, 3H) ppm.  $^{13}\text{C}$  NMR (100 MHz, DMSO- $d_6$ ):  $\delta = 141.2, 135.8, 134.4, 131.9, 129.7, 129.6, 129.5, 129.4, 129.1, 128.0, 126.4, 125.1, 122.4, 120.5, 118.9, 118.6, 116.2, 36.4$  ppm. HRMS (ESI $^+$ ): calcd for  $\text{C}_{22}\text{H}_{19}\text{N}_2^+$   $[\text{M}-\text{I}^-]^+$  311.1543, found 311.1538.

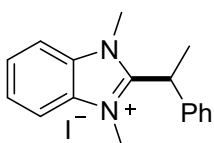

**1,3-dimethyl-2-(1-phenylethyl)-1H-benzo[*d*]imidazol-3-ium iodide (5):**

Purification via column chromatography on silica gel (DCM/MeOH = 30/1, v/v) afforded **5** as a light yellow solid (34.0 mg, 45% yield).  $^1\text{H}$  NMR (400 MHz,  $\text{CDCl}_3$ ):  $\delta = 7.81$ -7.76 (m, 2H), 7.66-7.62 (m, 2H), 7.43-7.39 (m, 2H), 7.35 (t,  $J = 7.6$  Hz, 1H), 7.24 (d,  $J = 7.6$  Hz, 2H), 5.43 (q,  $J = 7.2$  Hz, 1H), 4.08 (s, 6H), 2.10 (d,  $J = 7.2$  Hz, 3H) ppm.  $^{13}\text{C}$  NMR (100 MHz,  $\text{CDCl}_3$ ):  $\delta = 154.4, 135.9, 131.9, 129.9, 128.7, 127.5, 127.1, 113.1, 35.4, 34.3, 17.5$  ppm. HRMS (ESI $^+$ ): calcd for  $\text{C}_{17}\text{H}_{19}\text{N}_2^+$   $[\text{M}-\text{I}^-]^+$  251.1543, found 251.1540.

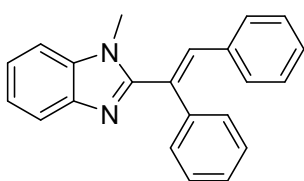

**(*E*)-2-(1,2-diphenylvinyl)-1-methyl-1H-benzo[*d*]imidazole (6):**

Purification via column chromatography on silica gel PE/EA (v/v = 3/1) afforded **6** as a white solid (61.5 mg, 99% yield).  $^1\text{H}$  NMR (400 MHz,  $\text{CDCl}_3$ ):  $\delta = 7.87$ -7.84 (m, 1H), 7.45 (s, 1H), 7.36-7.30

(m, 8H), 7.19 (s, 1H), 7.16-7.14 (m, 2H), 6.95-6.93 (m, 2H), 3.37 (s, 3H) ppm.  $^{13}\text{C}$  NMR (100 MHz,  $\text{CDCl}_3$ ):  $\delta$  = 152.3, 143.4, 139.9, 136.0, 135.3, 134.0, 128.8, 128.765, 128.755, 128.4, 128.3, 126.8, 122.9, 122.4, 120.4, 109.8, 30.2 ppm. HRMS (ESI<sup>+</sup>): calcd for  $\text{C}_{22}\text{H}_{19}\text{N}_2^+$  [M+H]<sup>+</sup> 311.1543, found 311.1543.

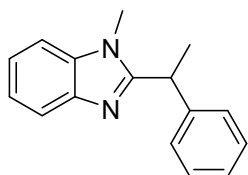

### 1-methyl-2-(1-phenylethyl)-1*H*-benzo[*d*]imidazole (7):

Purification via column chromatography on silica gel PE/EA (v/v = 3/1) afforded **7** as a white solid (45.8 mg, 97% yield).  $^1\text{H}$  NMR (400 MHz,  $\text{CDCl}_3$ ):  $\delta$  = 7.87-7.83 (m, 1H), 7.31-7.19 (m, 8H), 4.35 (q,  $J$  = 7.2 Hz, 1H), 3.48 (s, 3H), 1.87 (d,  $J$  = 7.2 Hz, 3H) ppm.  $^{13}\text{C}$  NMR (100 MHz,  $\text{CDCl}_3$ ):  $\delta$  = 156.9, 143.0, 142.4, 136.2, 129.0, 127.5, 127.0, 122.4, 121.9, 119.7, 109.0, 39.1, 29.9, 21.8 ppm. HRMS (ESI<sup>+</sup>): calcd for  $\text{C}_{16}\text{H}_{17}\text{N}_2^+$  [M+H]<sup>+</sup> 237.1386, found 237.1386.

## V. Single Crystal X-Ray Crystallographic Data

**Table S7.** Crystal data and structure refinement for **3a**

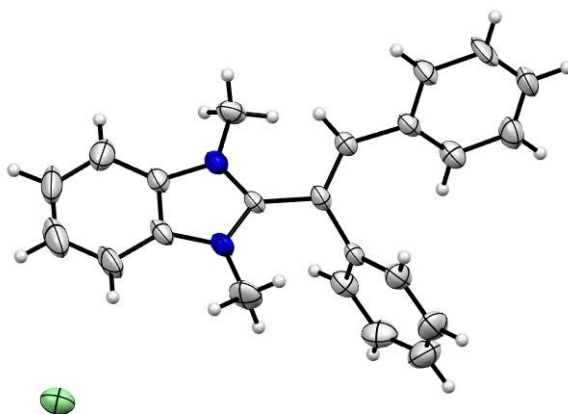

|                     |                                        |
|---------------------|----------------------------------------|
| Identification code | 2114144                                |
| Empirical formula   | $\text{C}_{23}\text{H}_{21}\text{N}_2$ |
| Formula weight      | 452.32                                 |

|                                             |                                                               |
|---------------------------------------------|---------------------------------------------------------------|
| Temperature/K                               | 292.2(6)                                                      |
| Crystal system                              | monoclinic                                                    |
| Space group                                 | P2 <sub>1</sub> /c                                            |
| a/Å                                         | 16.5543(4)                                                    |
| b/Å                                         | 8.6038(2)                                                     |
| c/Å                                         | 14.9273(4)                                                    |
| $\alpha$ /°                                 | 90                                                            |
| $\beta$ /°                                  | 105.336(3)                                                    |
| $\gamma$ /°                                 | 90                                                            |
| Volume/Å <sup>3</sup>                       | 2050.41(10)                                                   |
| Z                                           | 4                                                             |
| $\rho_{\text{calc}}/\text{cm}^3$            | 1.465                                                         |
| $\mu/\text{mm}^{-1}$                        | 12.315                                                        |
| F(000)                                      | 904.0                                                         |
| Crystal size/mm <sup>3</sup>                | 0.4 × 0.2 × 0.2                                               |
| Radiation                                   | CuK $\alpha$ ( $\lambda$ = 1.54184)                           |
| 2 $\Theta$ range for data collection/°      | 11.084 to 142.726                                             |
| Index ranges                                | -20 ≤ h ≤ 19, -6 ≤ k ≤ 10, -14 ≤ l ≤ 18                       |
| Reflections collected                       | 11549                                                         |
| Independent reflections                     | 3936 [R <sub>int</sub> = 0.0668, R <sub>sigma</sub> = 0.0539] |
| Data/restraints/parameters                  | 3936/0/237                                                    |
| Goodness-of-fit on F <sup>2</sup>           | 1.062                                                         |
| Final R indexes [I ≥ 2 $\sigma$ (I)]        | R <sub>1</sub> = 0.0618, wR <sub>2</sub> = 0.1693             |
| Final R indexes [all data]                  | R <sub>1</sub> = 0.0677, wR <sub>2</sub> = 0.1795             |
| Largest diff. peak/hole / e Å <sup>-3</sup> | 1.34/-2.03                                                    |

**Table S8.** Crystal data and structure refinement for **3r**

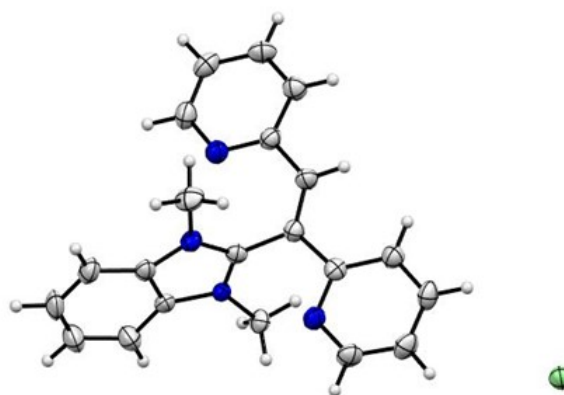

|                     |                                                 |
|---------------------|-------------------------------------------------|
| Identification code | 2114142                                         |
| Empirical formula   | C <sub>21</sub> H <sub>19</sub> IN <sub>4</sub> |
| Formula weight      | 454.30                                          |
| Temperature/K       | 150.0                                           |
| Crystal system      | triclinic                                       |

|                                             |                                                                |
|---------------------------------------------|----------------------------------------------------------------|
| Space group                                 | P-1                                                            |
| a/Å                                         | 7.887(3)                                                       |
| b/Å                                         | 10.676(5)                                                      |
| c/Å                                         | 11.448(4)                                                      |
| $\alpha$ /°                                 | 80.632(18)                                                     |
| $\beta$ /°                                  | 89.145(17)                                                     |
| $\gamma$ /°                                 | 86.29(2)                                                       |
| Volume/Å <sup>3</sup>                       | 949.1(7)                                                       |
| Z                                           | 2                                                              |
| $\rho_{\text{calc}}$ /cm <sup>3</sup>       | 1.590                                                          |
| $\mu$ /mm <sup>-1</sup>                     | 1.699                                                          |
| F(000)                                      | 452.0                                                          |
| Crystal size/mm <sup>3</sup>                | 0.3 × 0.3 × 0.1                                                |
| Radiation                                   | MoK $\alpha$ ( $\lambda$ = 0.71073)                            |
| 2 $\theta$ range for data collection/°      | 4.846 to 51.358                                                |
| Index ranges                                | -9 ≤ h ≤ 9, -13 ≤ k ≤ 13, -13 ≤ l ≤ 13                         |
| Reflections collected                       | 30470                                                          |
| Independent reflections                     | 3565 [ $R_{\text{int}}$ = 0.1207, $R_{\text{sigma}}$ = 0.0578] |
| Data/restraints/parameters                  | 4495/4/289                                                     |
| Goodness-of-fit on F <sup>2</sup>           | 1.030                                                          |
| Final R indexes [ $I \geq 2\sigma(I)$ ]     | $R_1$ = 0.0498, $wR_2$ = 0.1222                                |
| Final R indexes [all data]                  | $R_1$ = 0.0555, $wR_2$ = 0.1258                                |
| Largest diff. peak/hole / e Å <sup>-3</sup> | 1.78/-1.94                                                     |

## VI. References

(1) (a) Zhang, H.; Cai, Q.; Ma, D. Amino Acid Promoted CuI-Catalyzed C–N Bond Formation between Aryl Halides and Amines or N-Containing Heterocycles. *J. Org. Chem.* **2005**, *70*, 5164-5173. (b) Zhu, L.; Cheng, L.; Zhang, Y.; Xie, R.; You, J. Highly Efficient Copper-Catalyzed *N*-Arylation of Nitrogen-Containing Heterocycles with Aryl and Heteroaryl Halides. *J. Org. Chem.* **2007**, *72*, 2737-2743. (c) Zhu, L.; Guo, P.; Li, G.; Lan, J.; Xie R.; You, J. Simple Copper Salt-Catalyzed *N*-Arylation of Nitrogen-Containing Heterocycles with Aryl and Heteroaryl Halides. *J. Org. Chem.* **2007**, *72*, 8535-8538. (d) Zhu, L.; Li, G.; Luo, L.; Guo, P.; Lan J.; You, J. Highly Functional Group Tolerance in Copper-Catalyzed *N*-Arylation of Nitrogen-Containing Heterocycles under Mild Conditions. *J. Org. Chem.* **2009**, *74*, 2200-2202.

(2) (a) Mio, M. J.; Kopel, L. C.; Braun, J. B.; Gadzikwa, T. L.; Hull, K. L.; Brisbois, R. G.; Markworth, C. J.; Grieco, P. A. One-Pot Synthesis of Symmetrical and Unsymmetrical Bisarylethynes by A Modification of the Sonogashira Coupling Reaction. *Org. Lett.* **2002**, *4*, 3199-

3202. (b) Park, K.; Bae, G.; Moon, J.; Choe, J.; Song, K. H.; Lee, S. Synthesis of Symmetrical and Unsymmetrical Diarylalkynes from Propiolic Acid Using Palladium-Catalyzed Decarboxylative Coupling. *J. Org. Chem.* **2010**, *75*, 6244-6251.

## VII. Copies of $^1\text{H}$ , $^1\text{H}$ - $^1\text{H}$ NOESY and $^{13}\text{C}$ NMR Spectra

### $^1\text{H}$ NMR Spectra (400 MHz, $\text{DMSO-}d_6$ ) of 3a

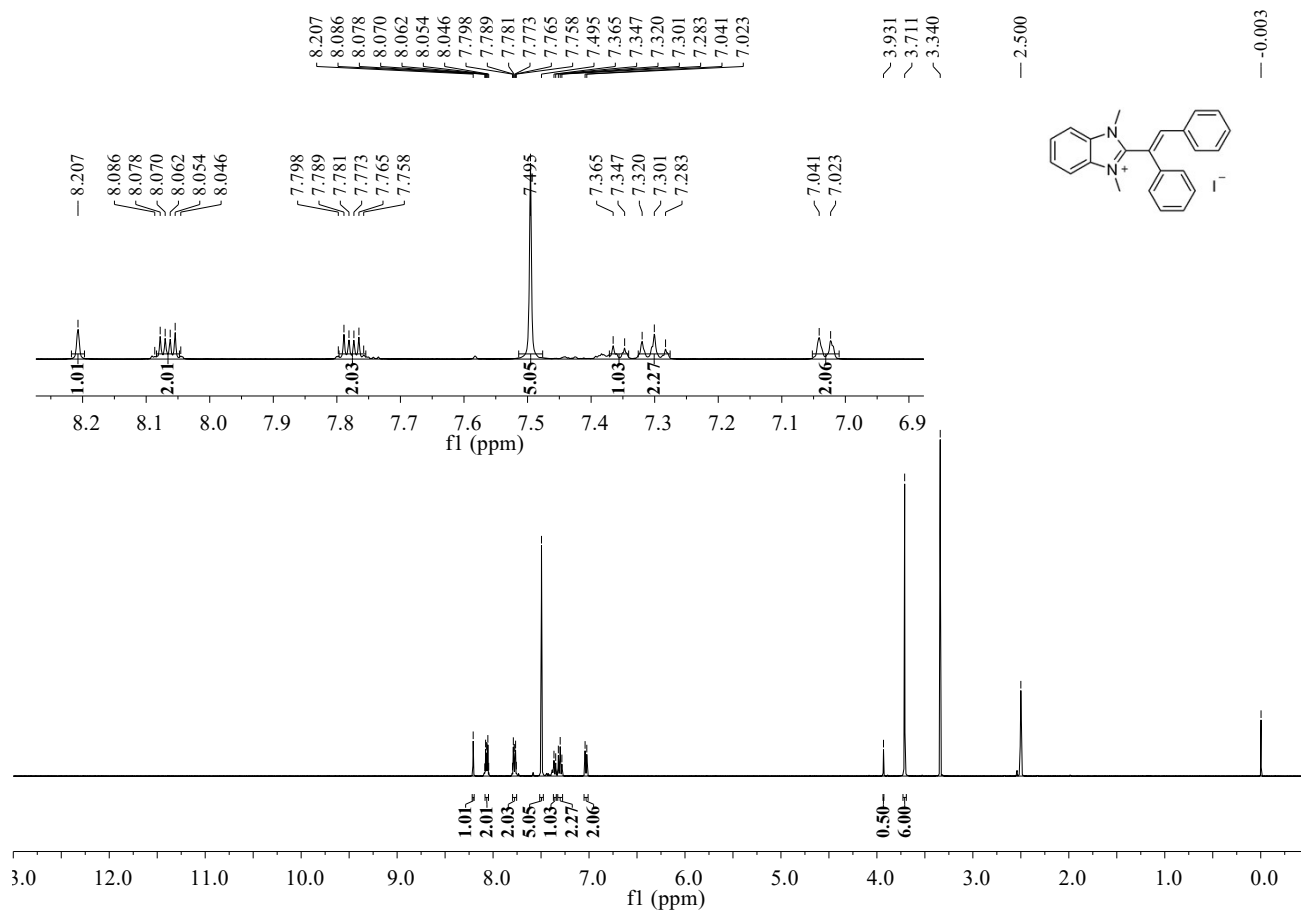

### $^{13}\text{C}$ NMR Spectra (100 MHz, $\text{CDCl}_3$ ) of 3a

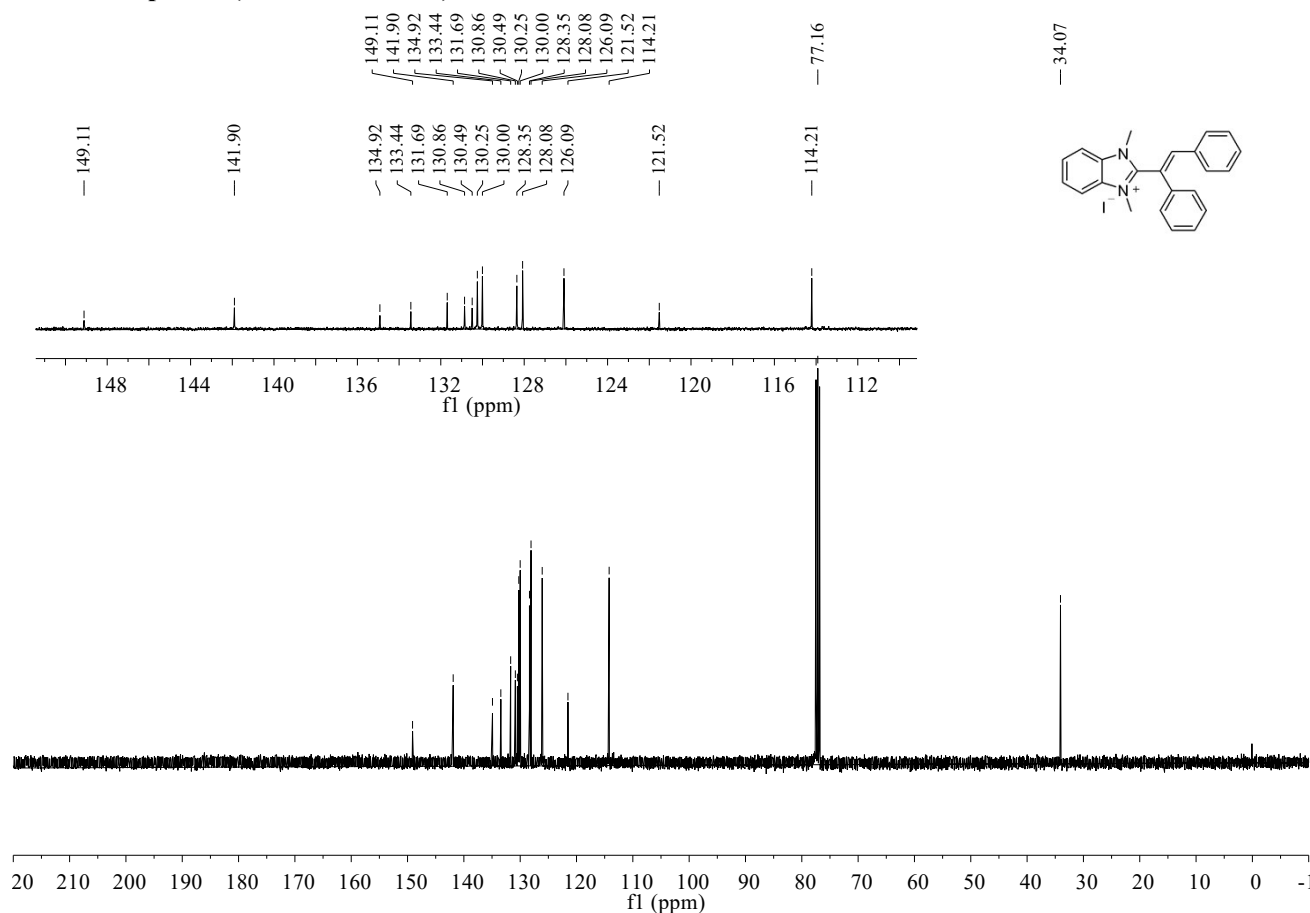

### <sup>1</sup>H NMR Spectra (400 MHz, DMSO-*d*<sub>6</sub>) of 3b

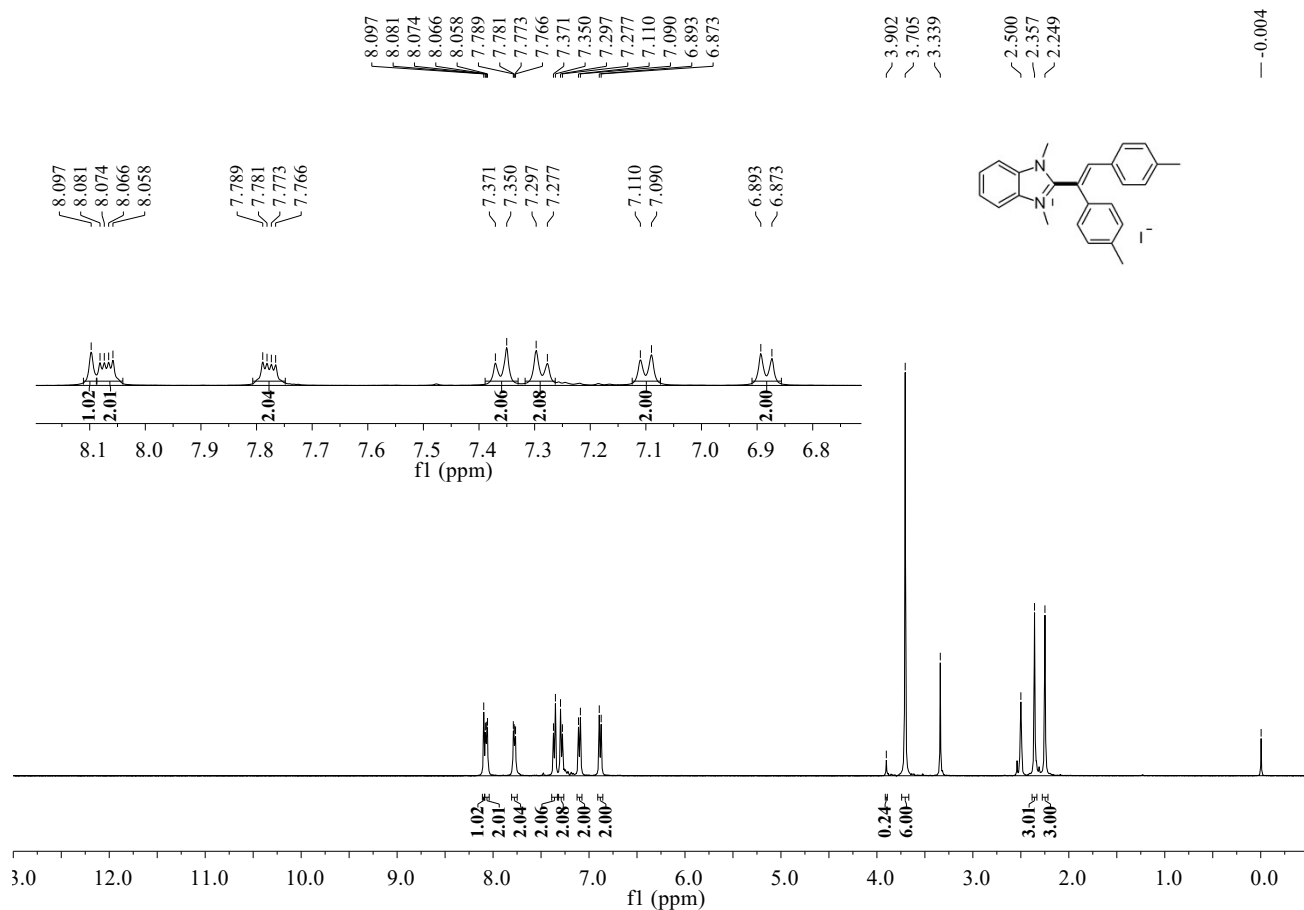

### <sup>13</sup>C NMR Spectra (100 MHz, DMSO-*d*<sub>6</sub>) of 3b

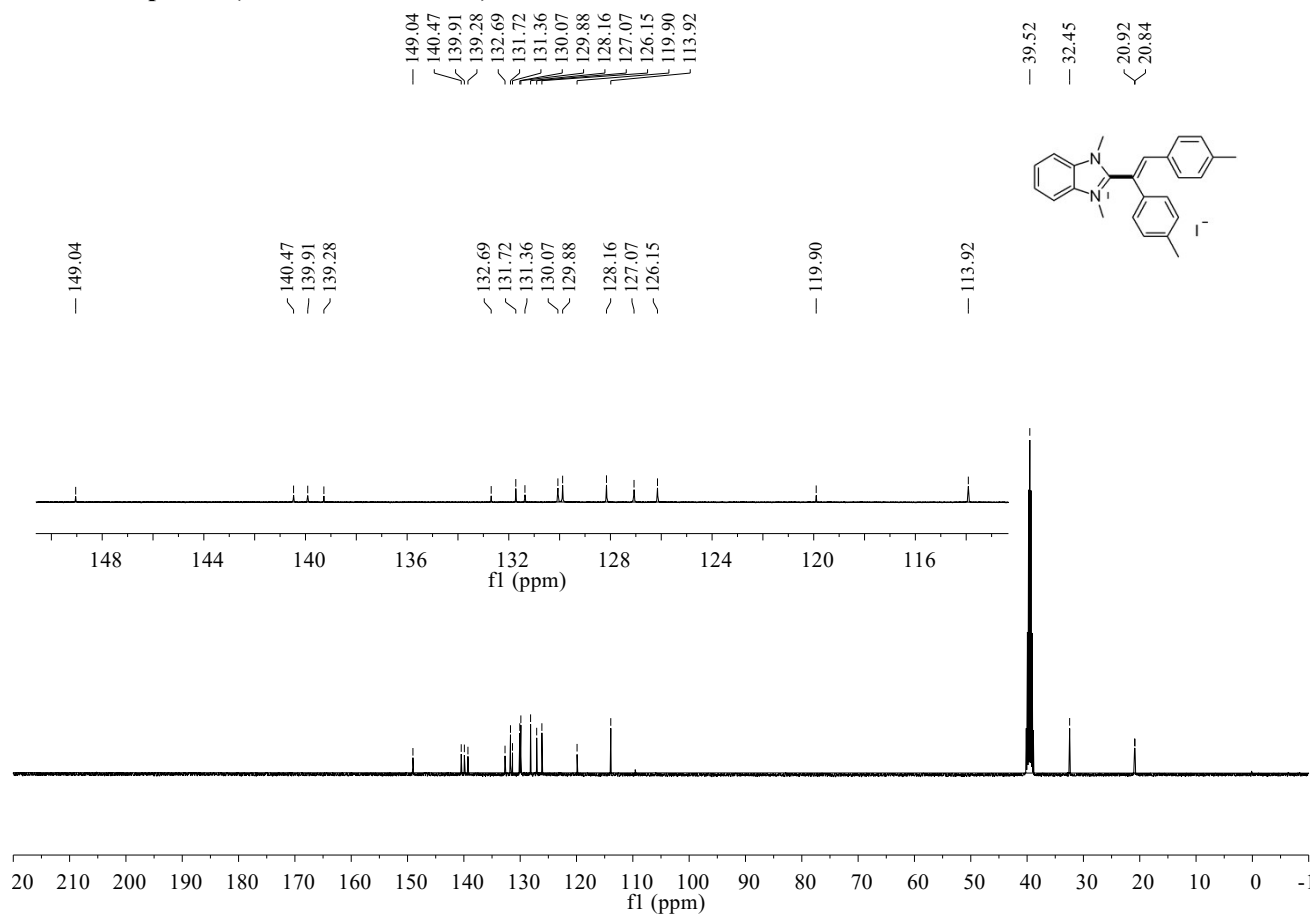

### <sup>1</sup>H NMR Spectra (400 MHz, DMSO-*d*<sub>6</sub>) of 3c

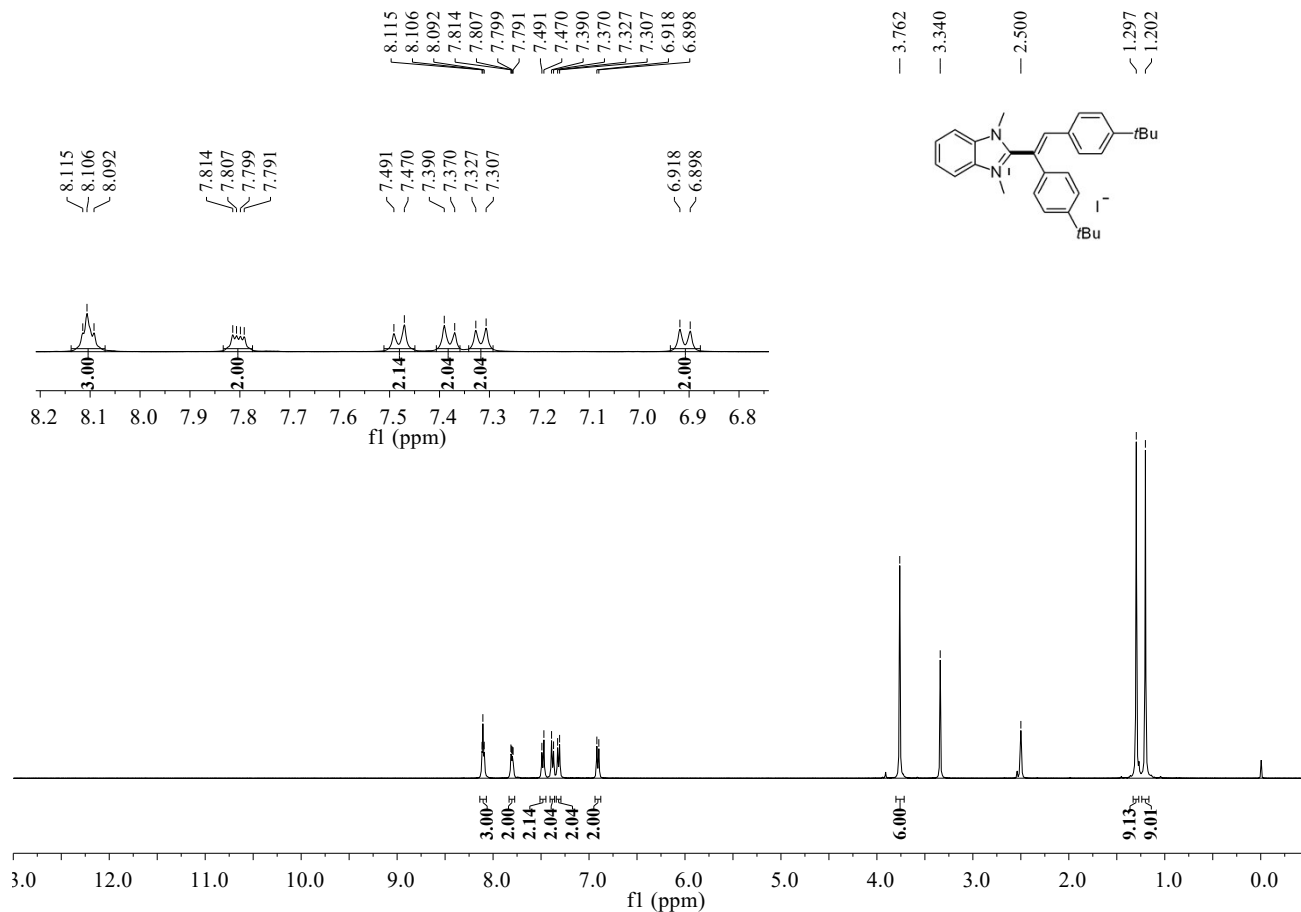

### <sup>13</sup>C NMR Spectra (100 MHz, DMSO-*d*<sub>6</sub>) of 3c

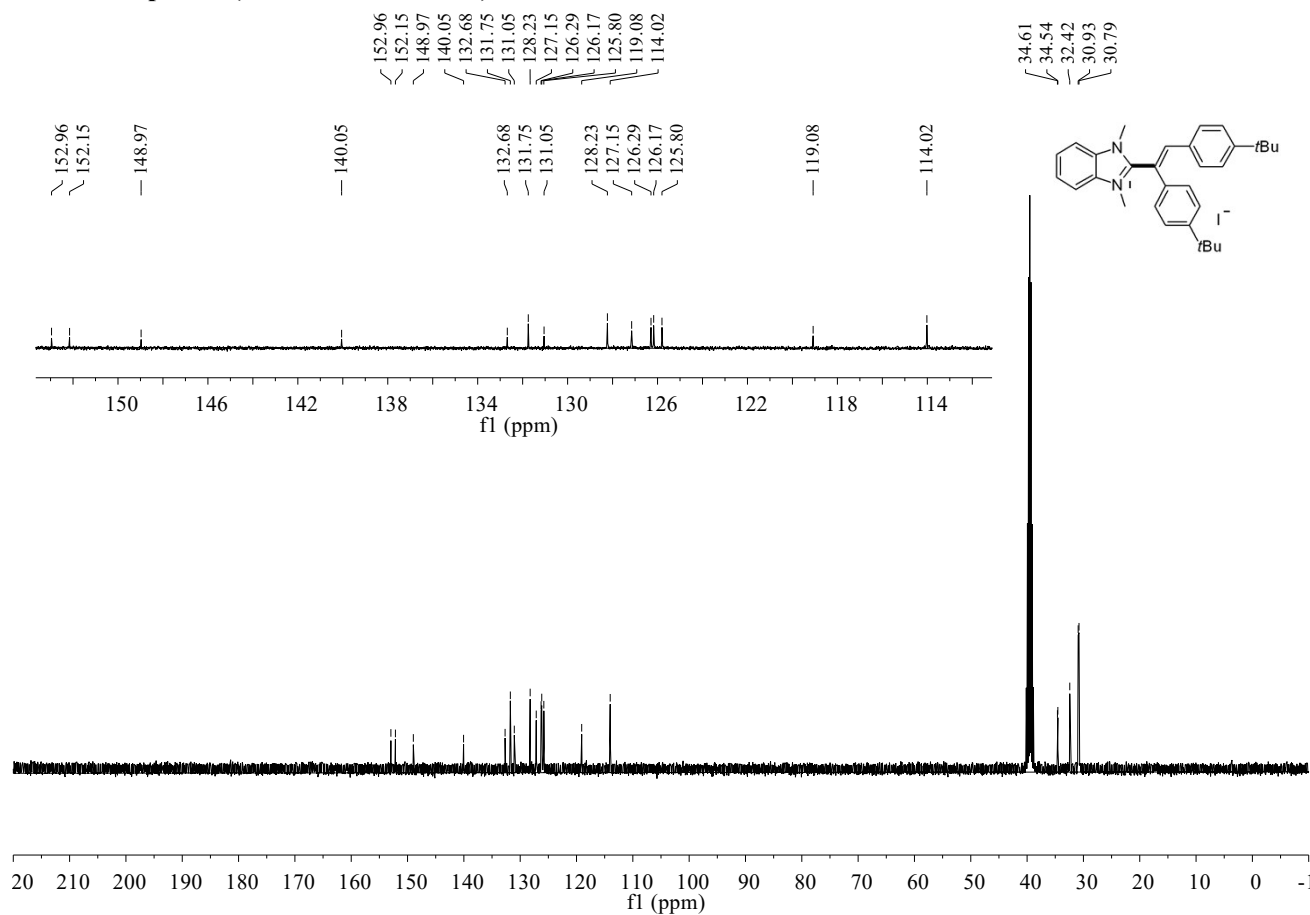



### <sup>1</sup>H NMR Spectra (400 MHz, CDCl<sub>3</sub>) of 3d

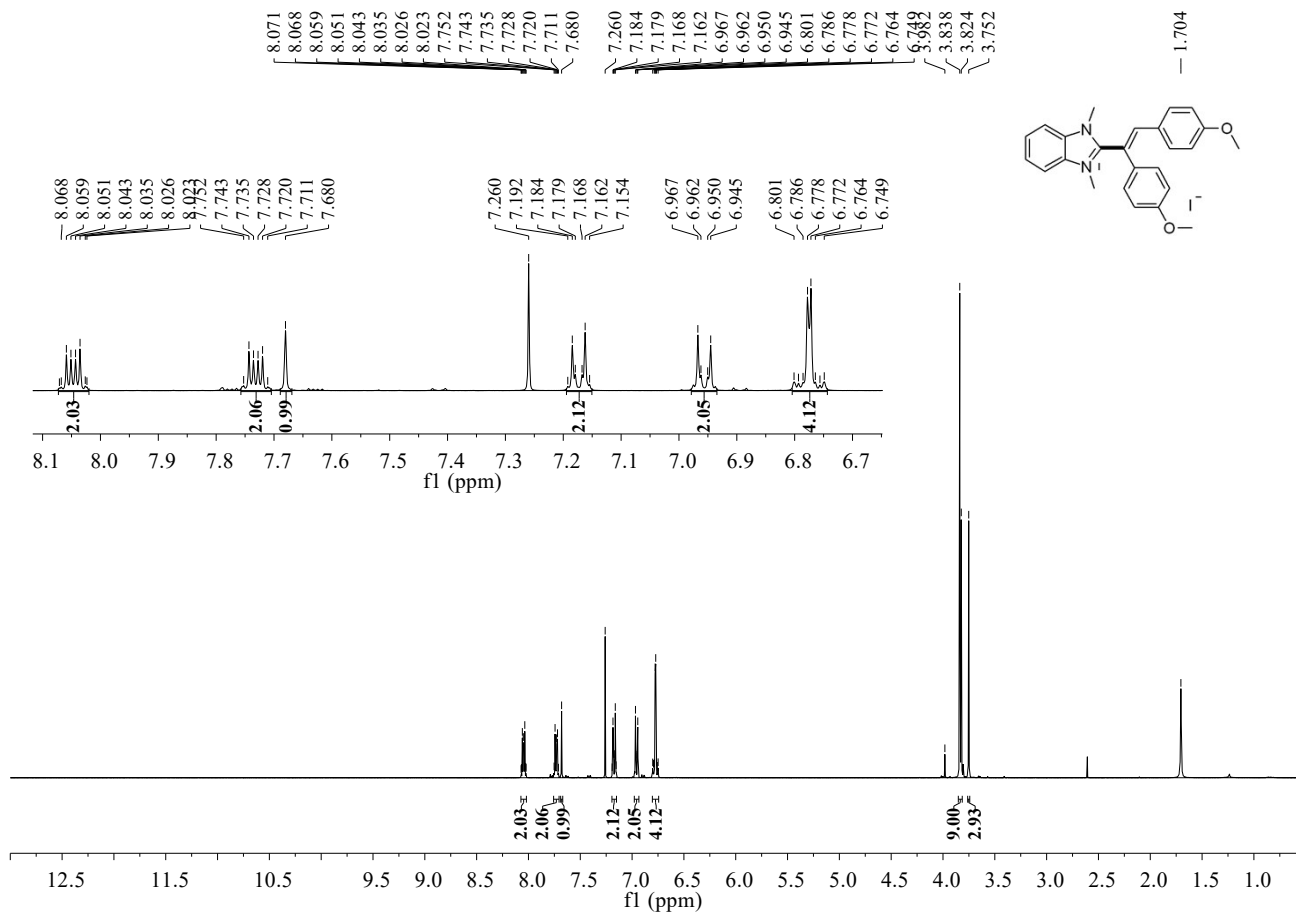

### <sup>13</sup>C NMR Spectra (100 MHz, CDCl<sub>3</sub>) of 3d

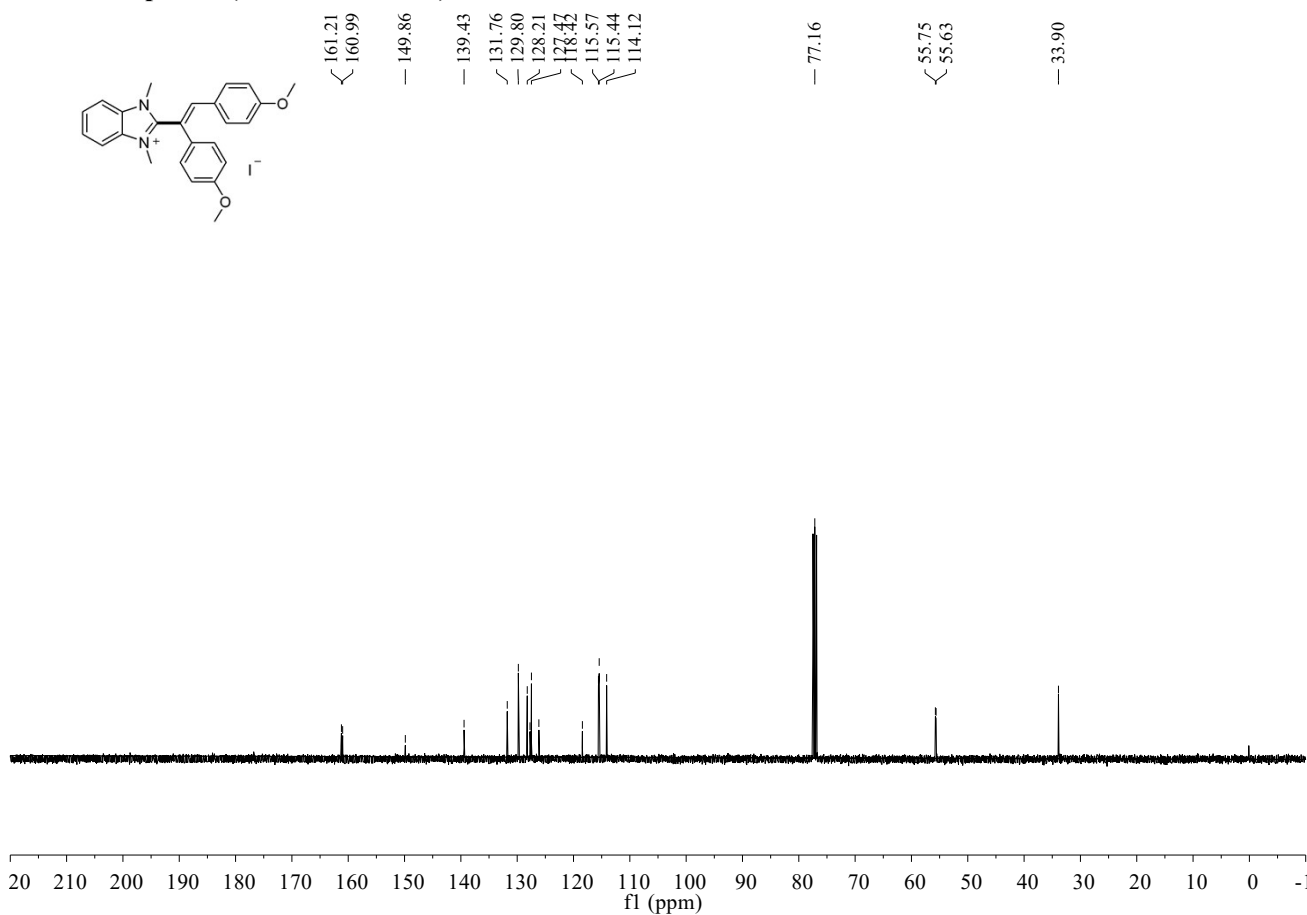



**<sup>1</sup>H NMR Spectra (400 MHz, DMSO-*d*<sub>6</sub>) of 3f**

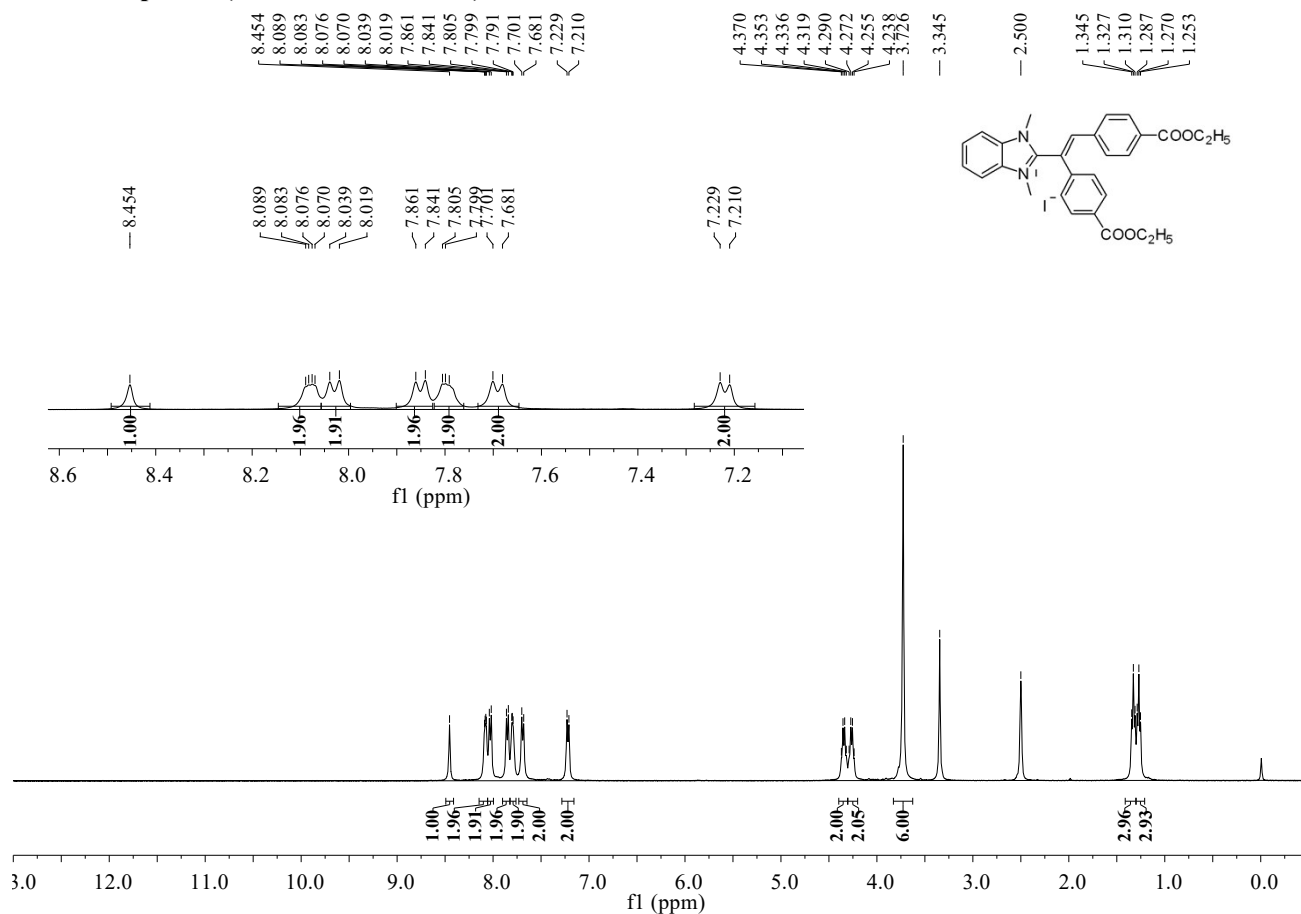

**<sup>13</sup>C NMR Spectra (100 MHz, DMSO-*d*<sub>6</sub>) of 3f**

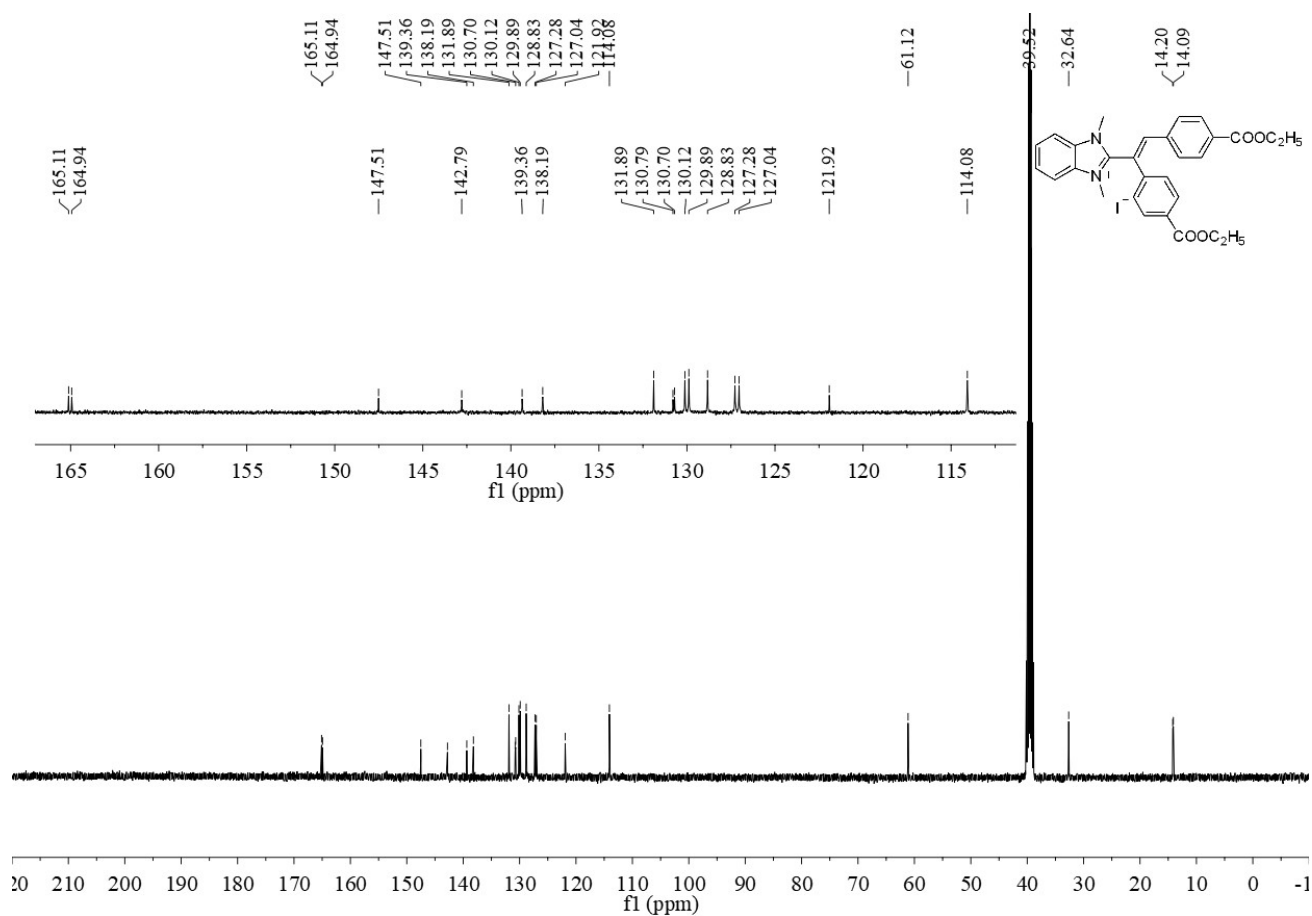

### <sup>1</sup>H NMR Spectra (400 MHz, DMSO-*d*<sub>6</sub>) of 3g

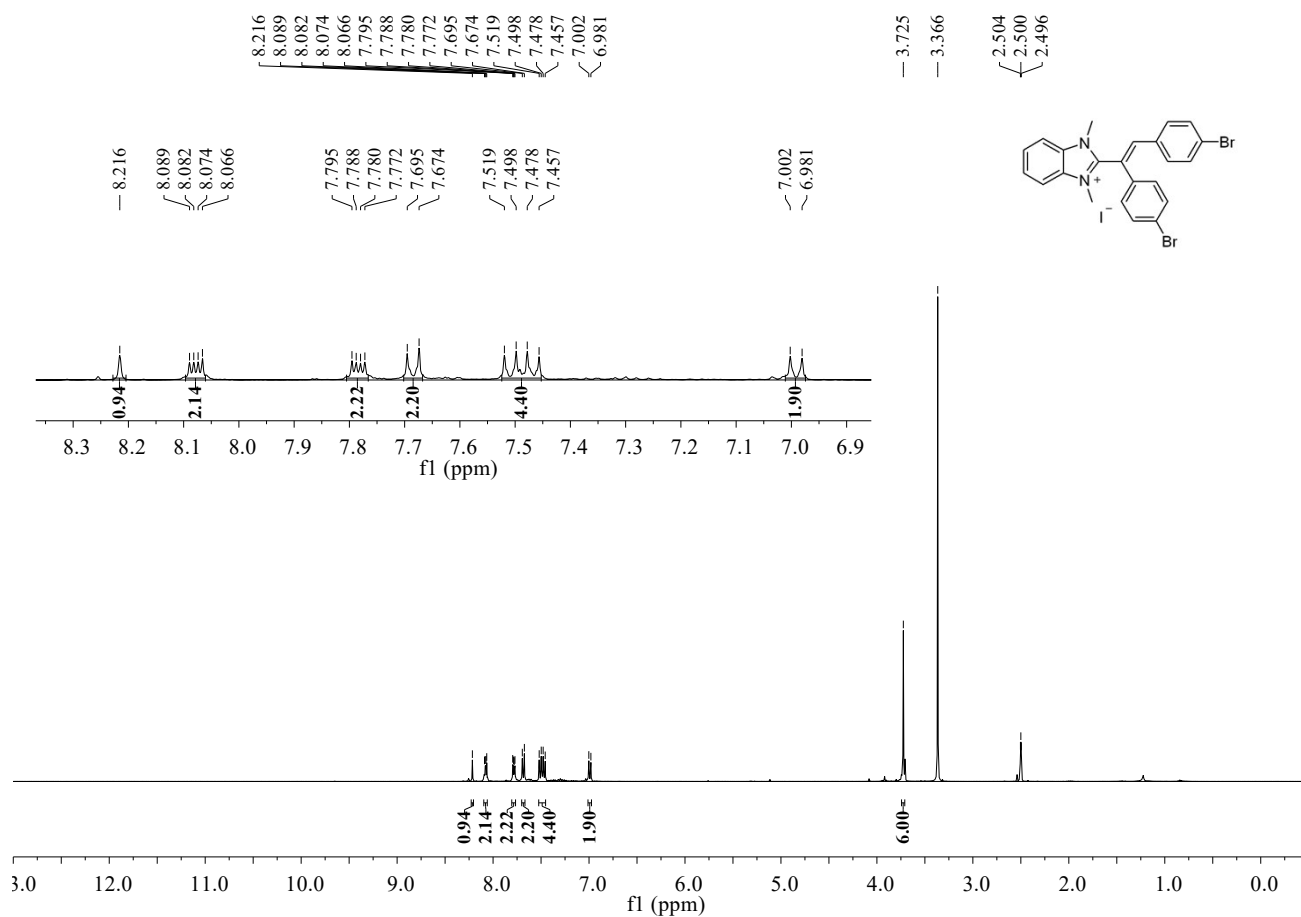

### <sup>13</sup>C NMR Spectra (100 MHz, DMSO-*d*<sub>6</sub>) of 3g

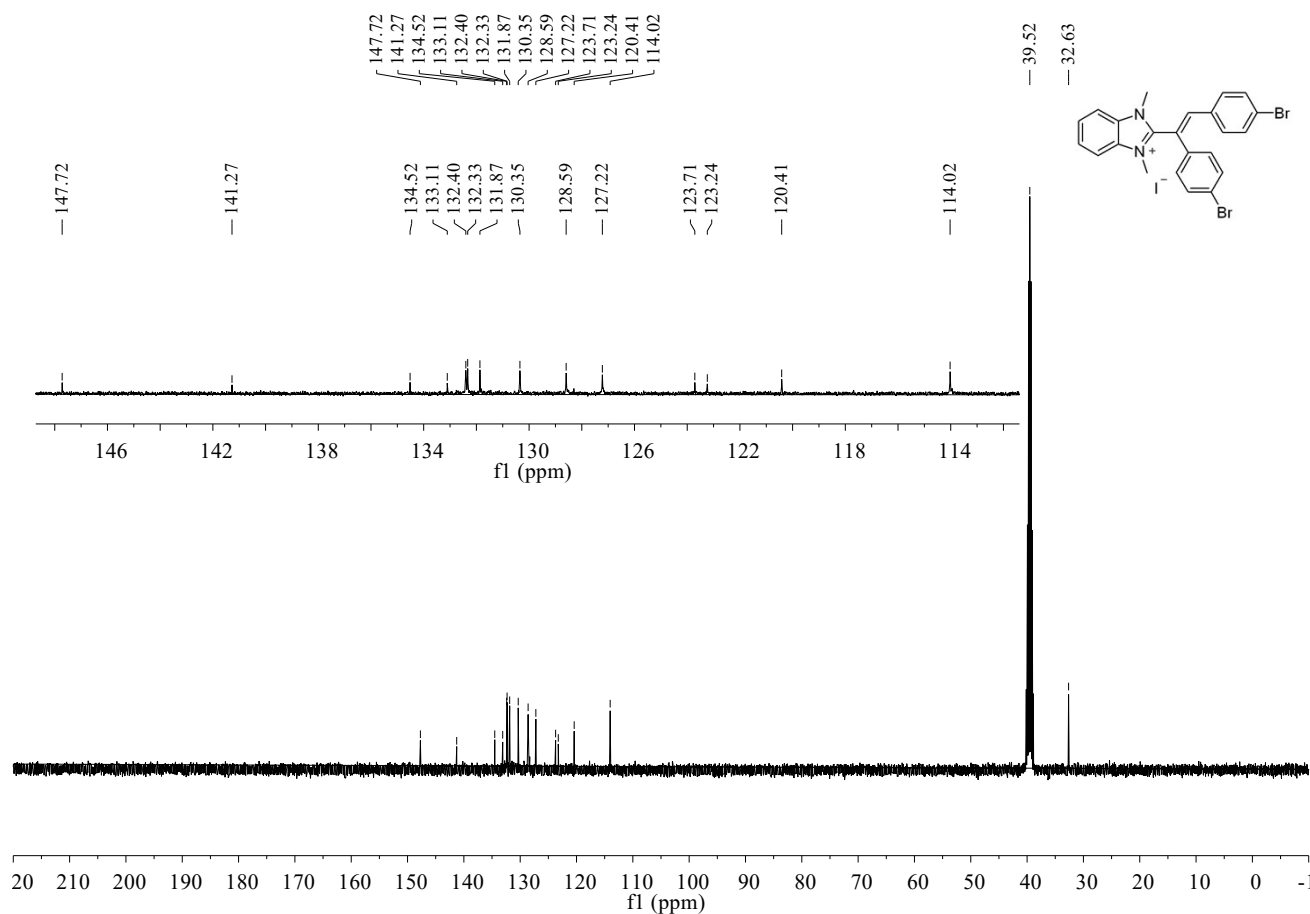

### <sup>1</sup>H NMR Spectra (400 MHz, DMSO-*d*<sub>6</sub>) of 3h

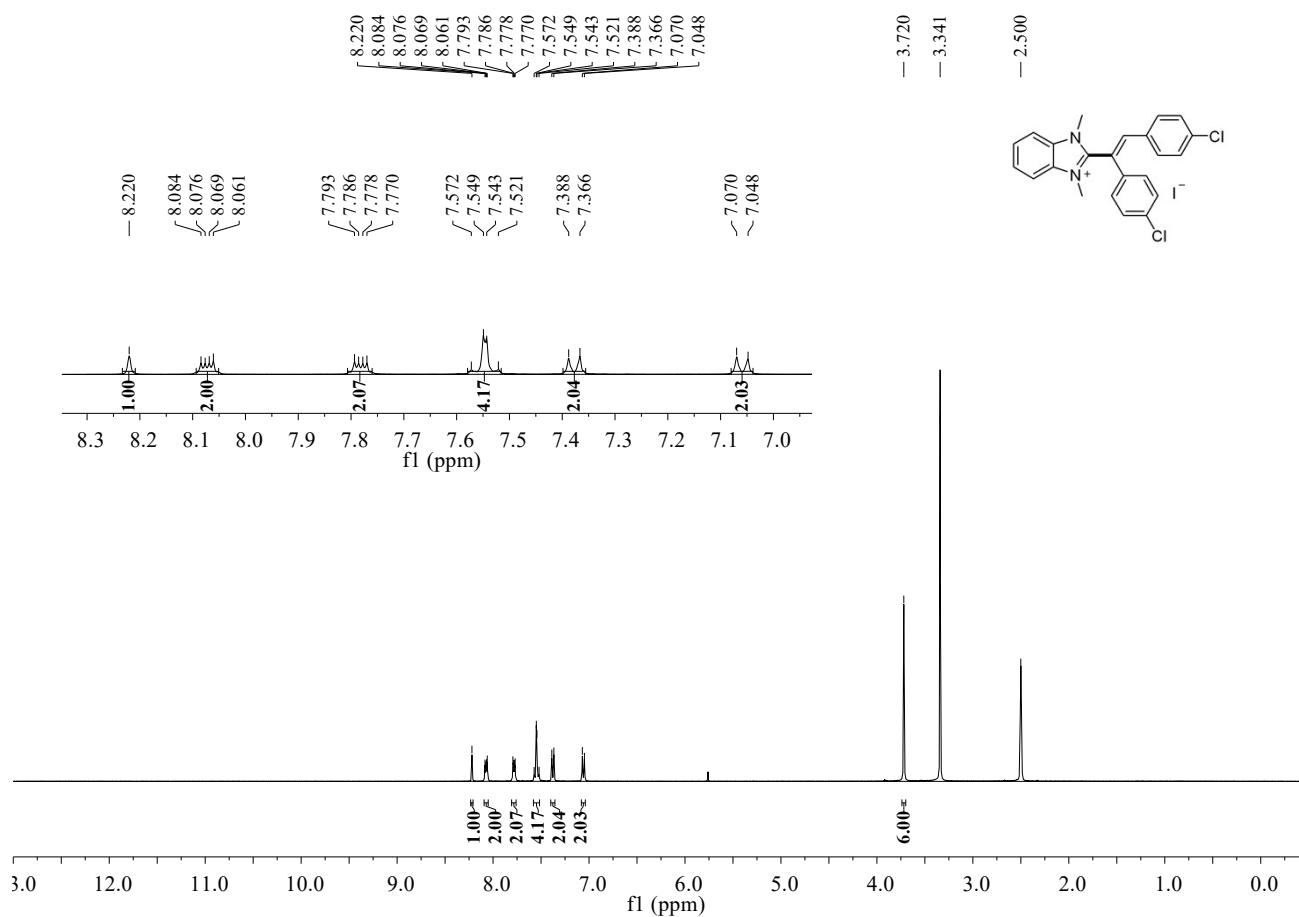

### <sup>13</sup>C NMR Spectra (100 MHz, DMSO-*d*<sub>6</sub>) of 3h

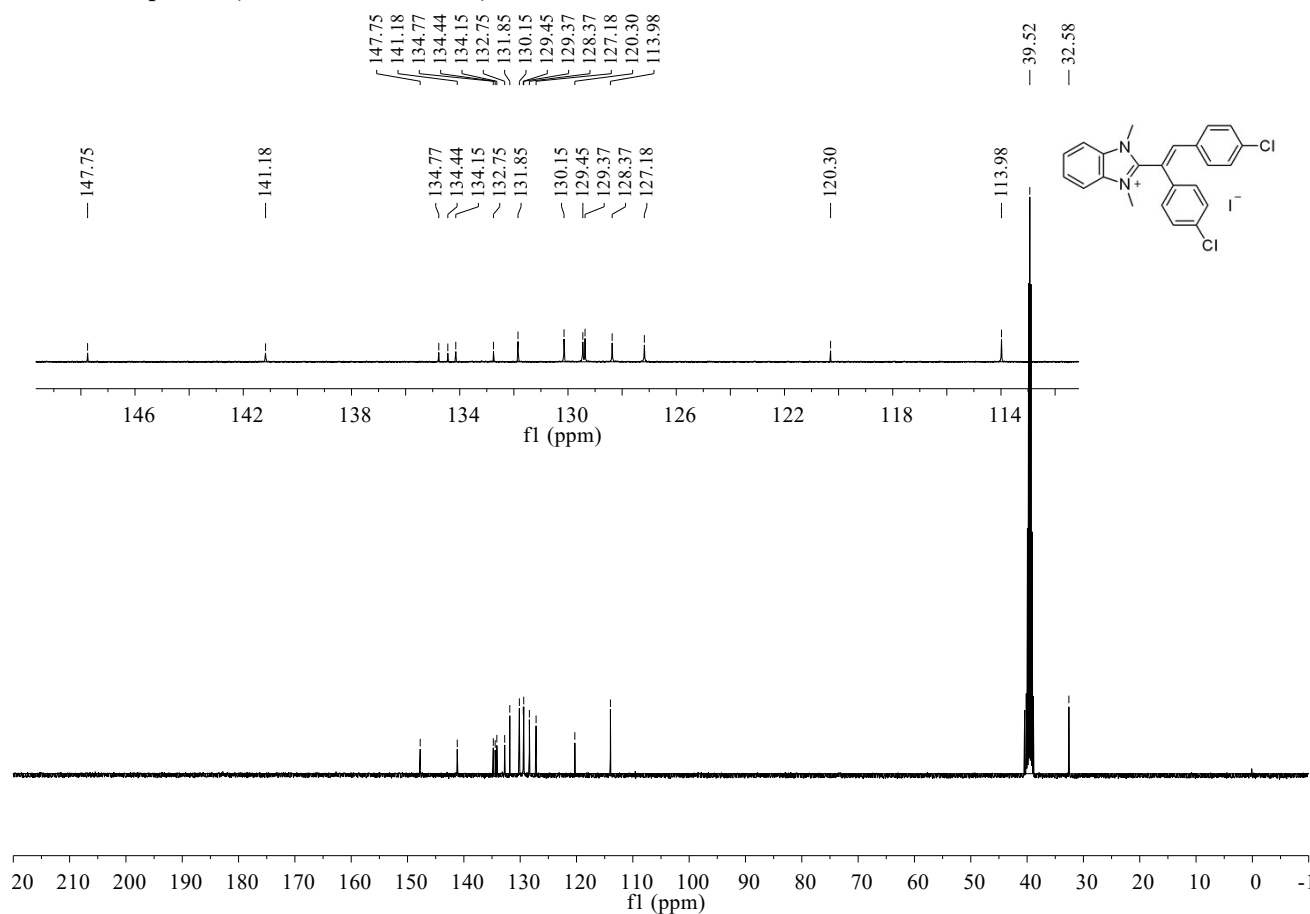

### <sup>1</sup>H NMR Spectra (400 MHz, DMSO-*d*<sub>6</sub>) of 3i

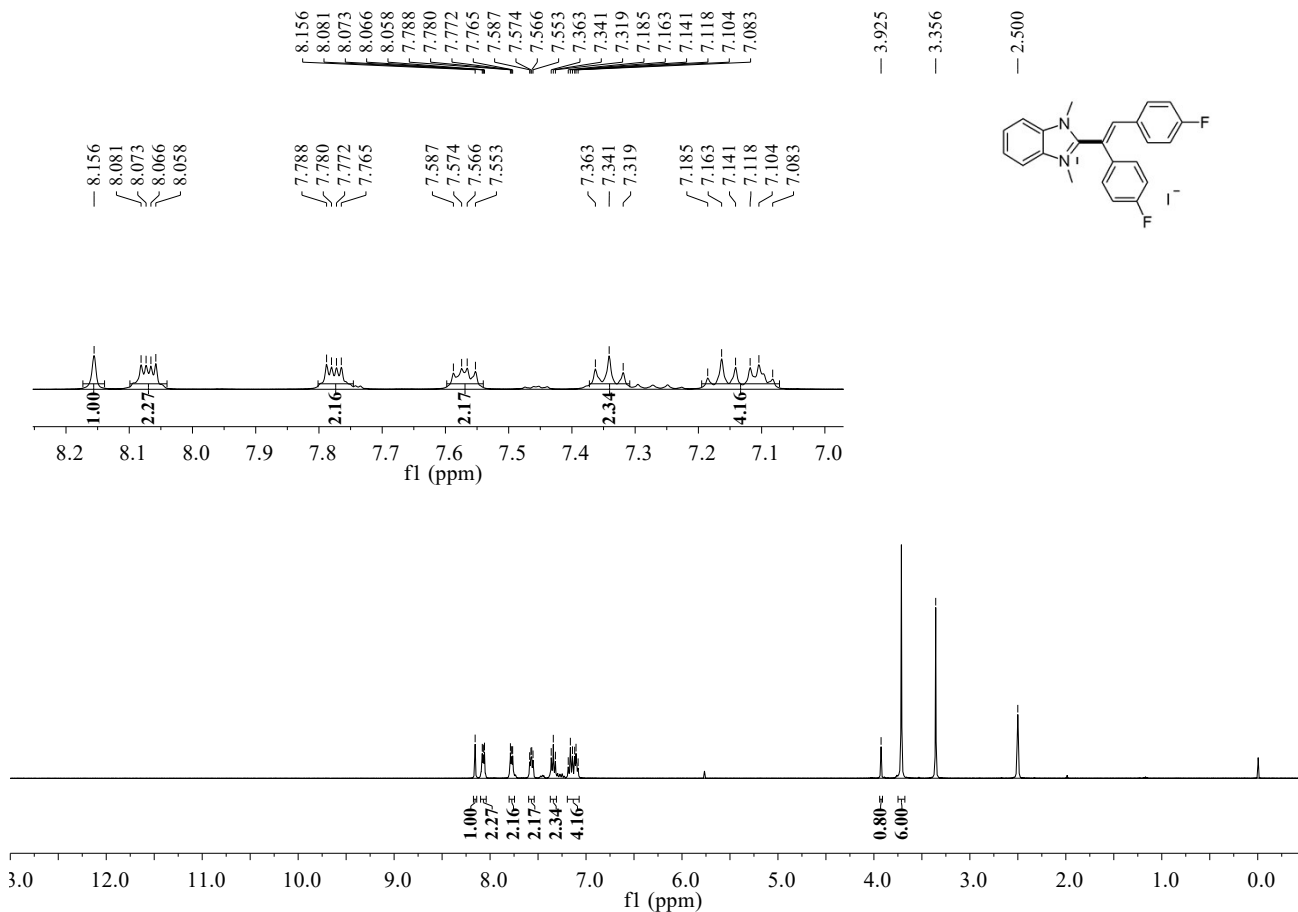

### <sup>13</sup>C NMR Spectra (100 MHz, DMSO-*d*<sub>6</sub>) of 3i

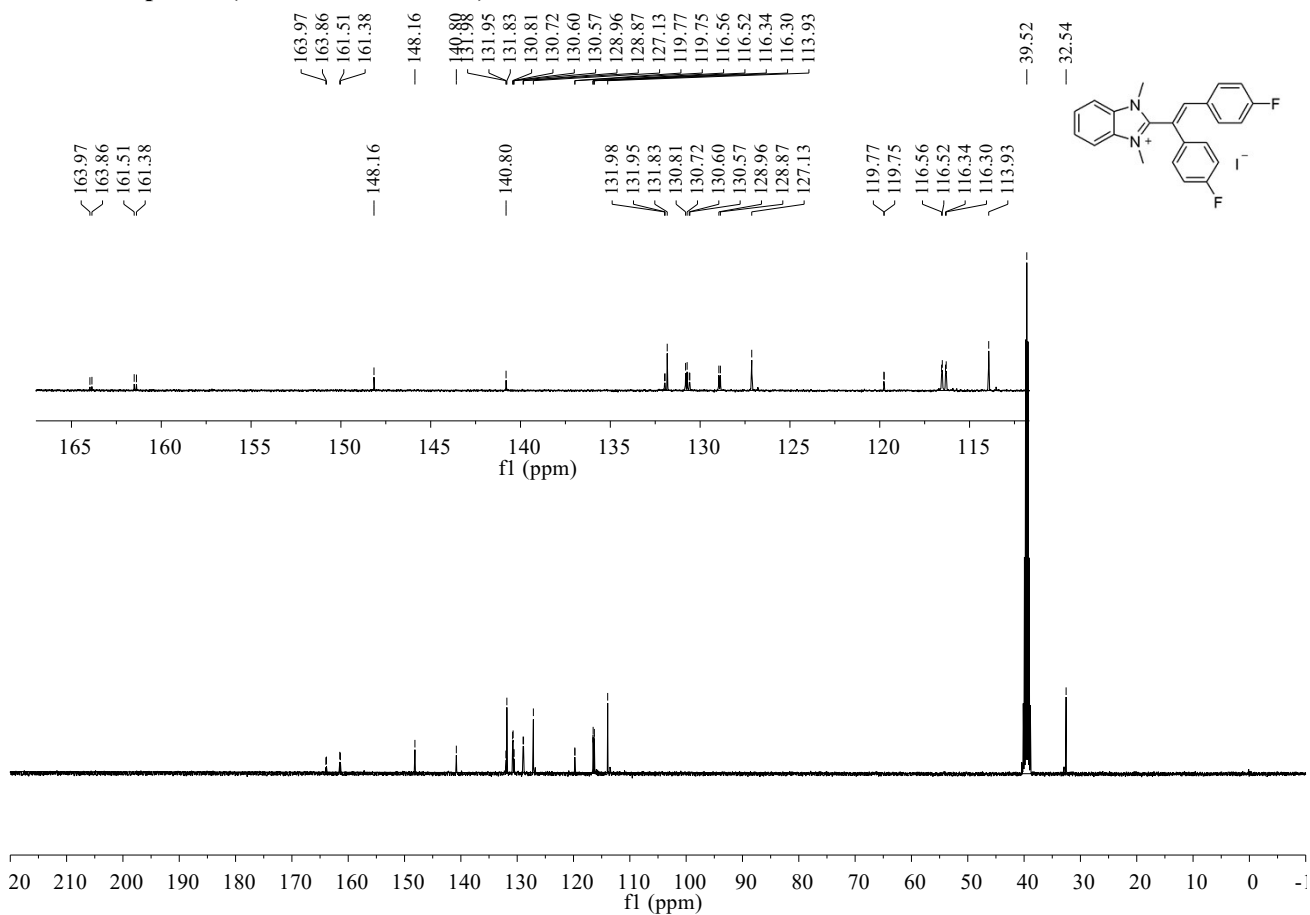

### <sup>1</sup>H NMR Spectra (400 MHz, DMSO-*d*<sub>6</sub>) of 3j

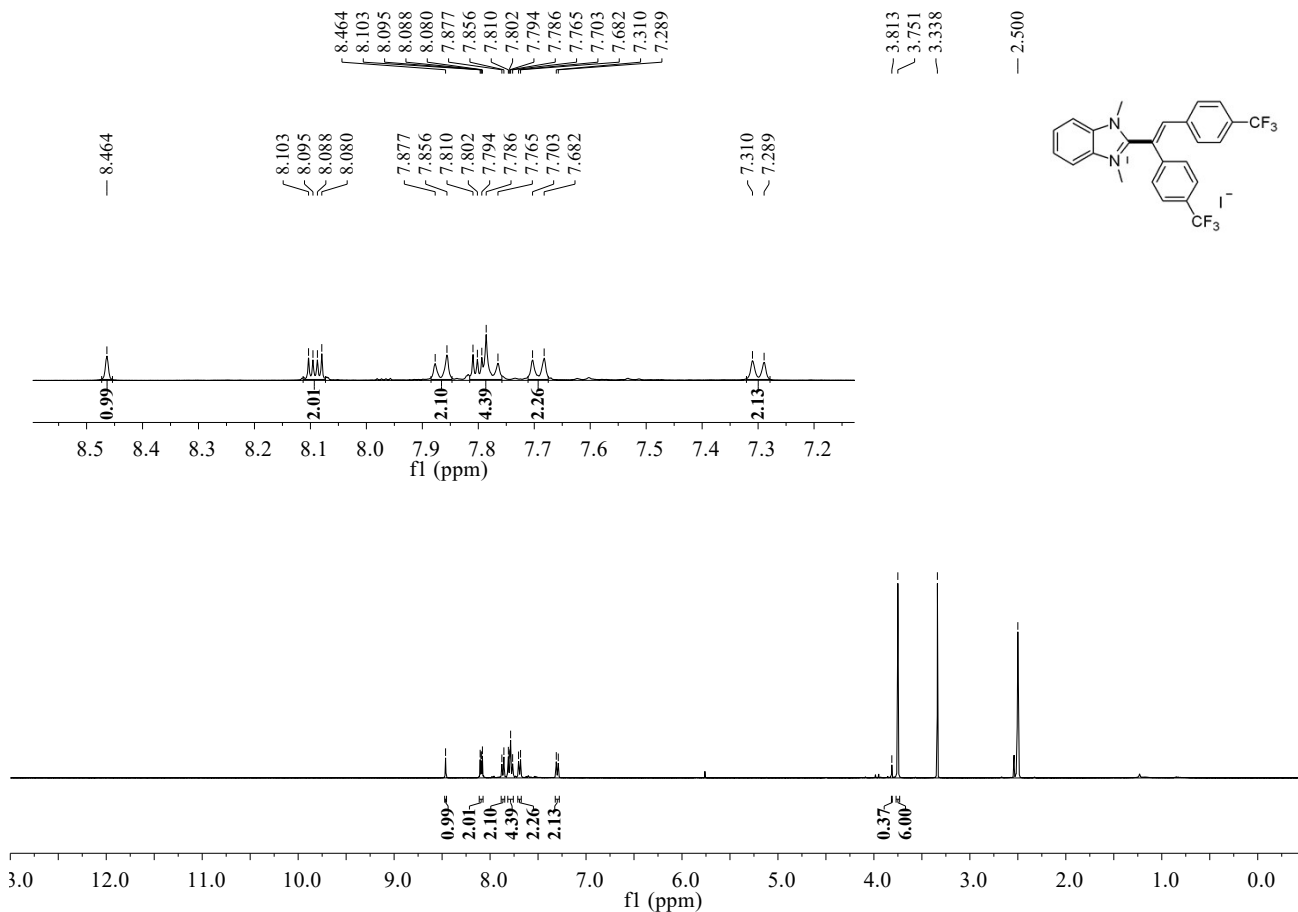

### <sup>13</sup>C NMR Spectra (100 MHz, DMSO-*d*<sub>6</sub>) of 3j

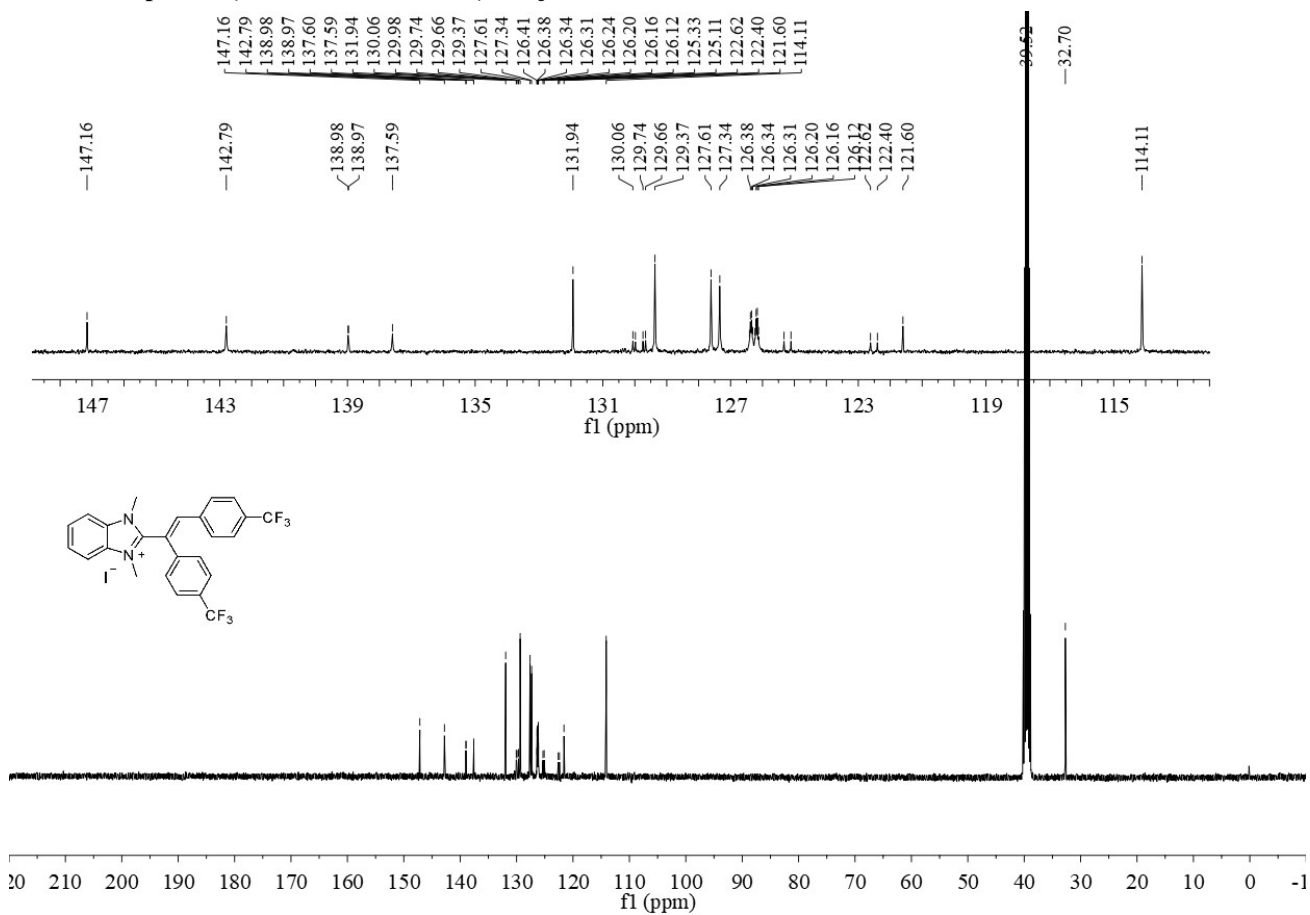

### <sup>1</sup>H NMR Spectra (400 MHz, DMSO-*d*<sub>6</sub>) of 3k

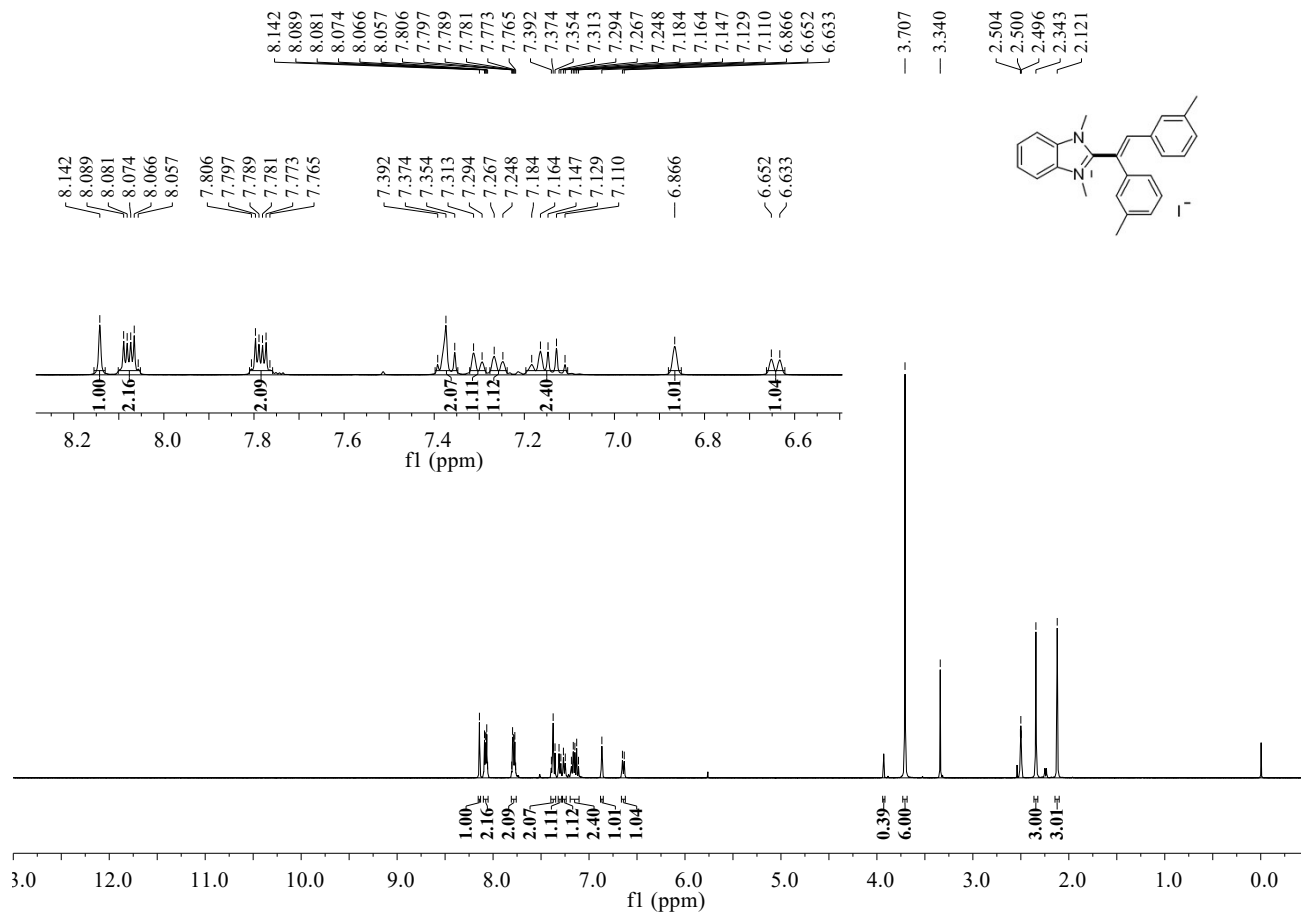

### <sup>13</sup>C NMR Spectra (100 MHz, DMSO-*d*<sub>6</sub>) of 3k

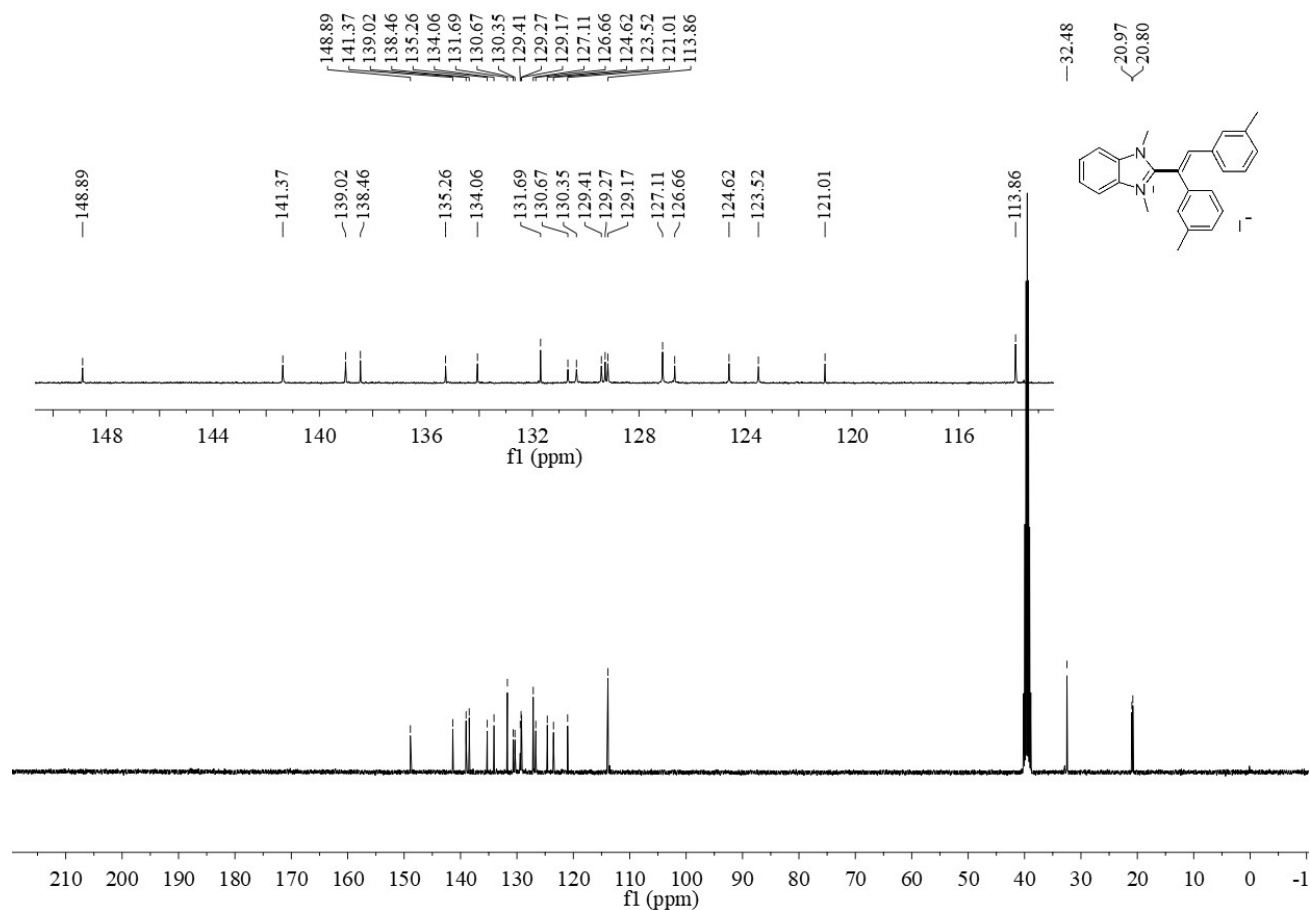



**<sup>1</sup>H NMR Spectra (400 MHz, CDCl<sub>3</sub>) of 31**

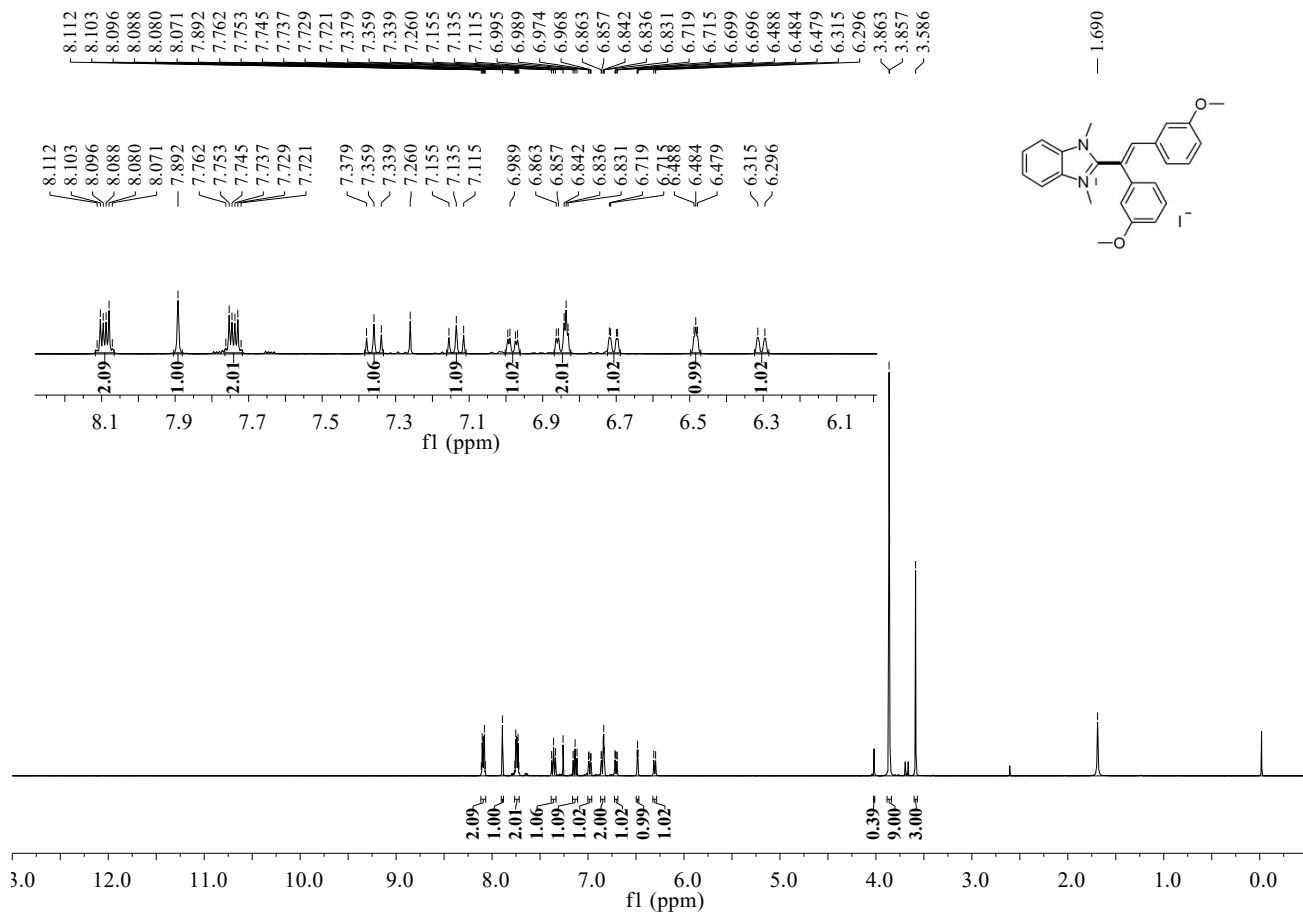

**<sup>13</sup>C NMR Spectra (100 MHz, CDCl<sub>3</sub>) of 31**

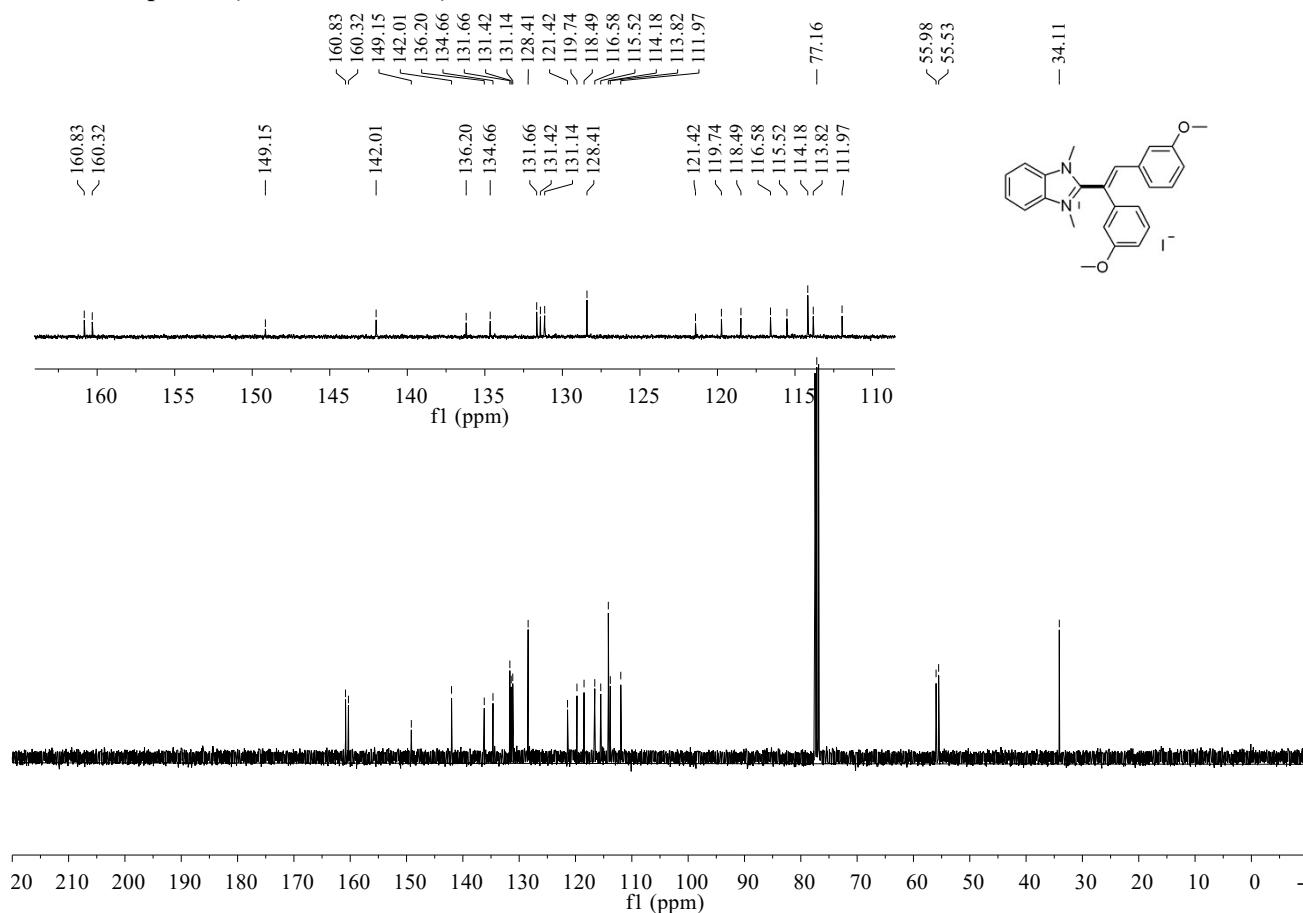

### <sup>1</sup>H NMR Spectra (400 MHz, DMSO-*d*<sub>6</sub>) of 3m

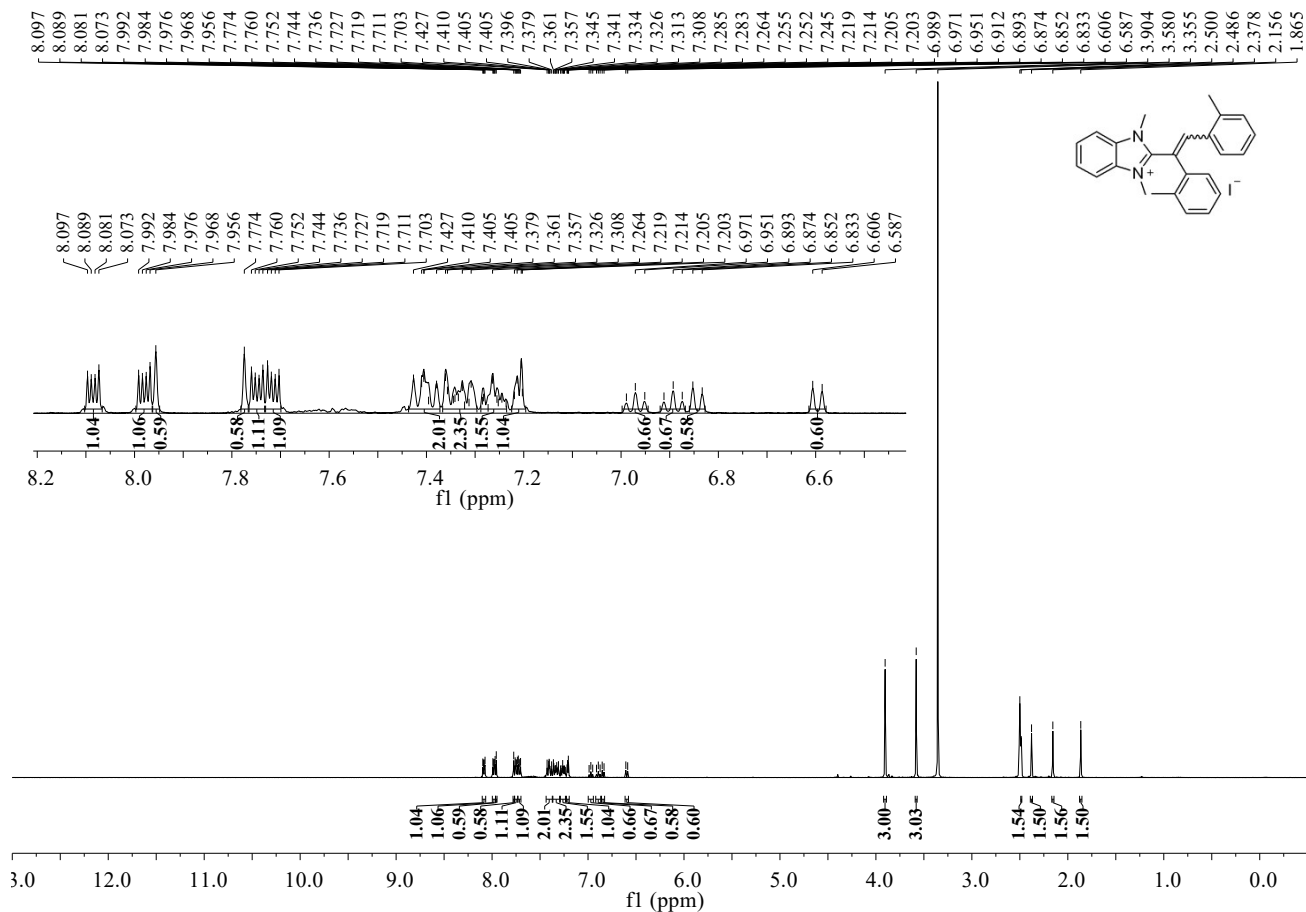

### <sup>13</sup>C NMR Spectra (100 MHz, DMSO-*d*<sub>6</sub>) of 3m

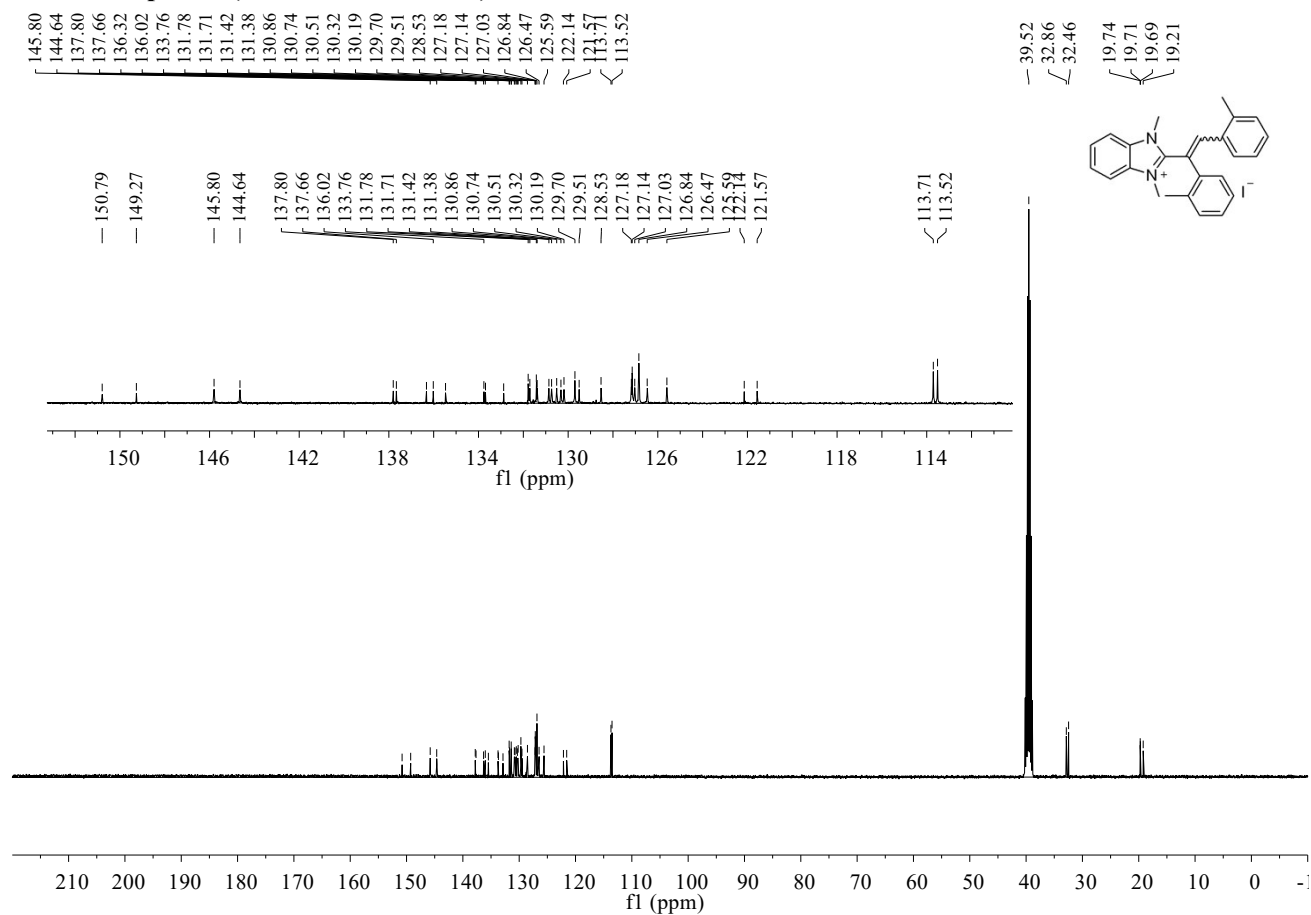

### <sup>1</sup>H NMR Spectra (400 MHz, CDCl<sub>3</sub>) of 3n

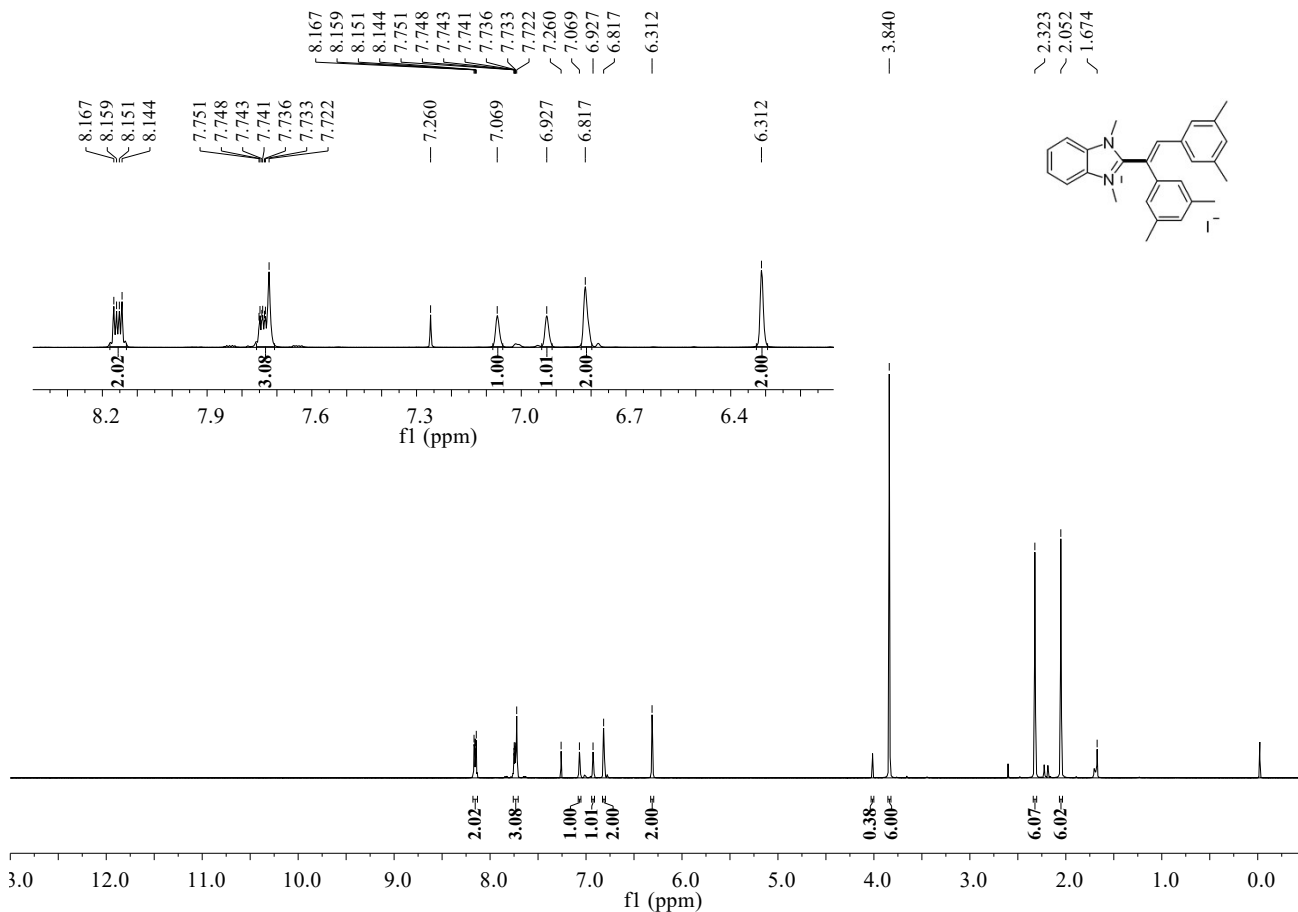

### <sup>13</sup>C NMR Spectra (100 MHz, CDCl<sub>3</sub>) of 3n

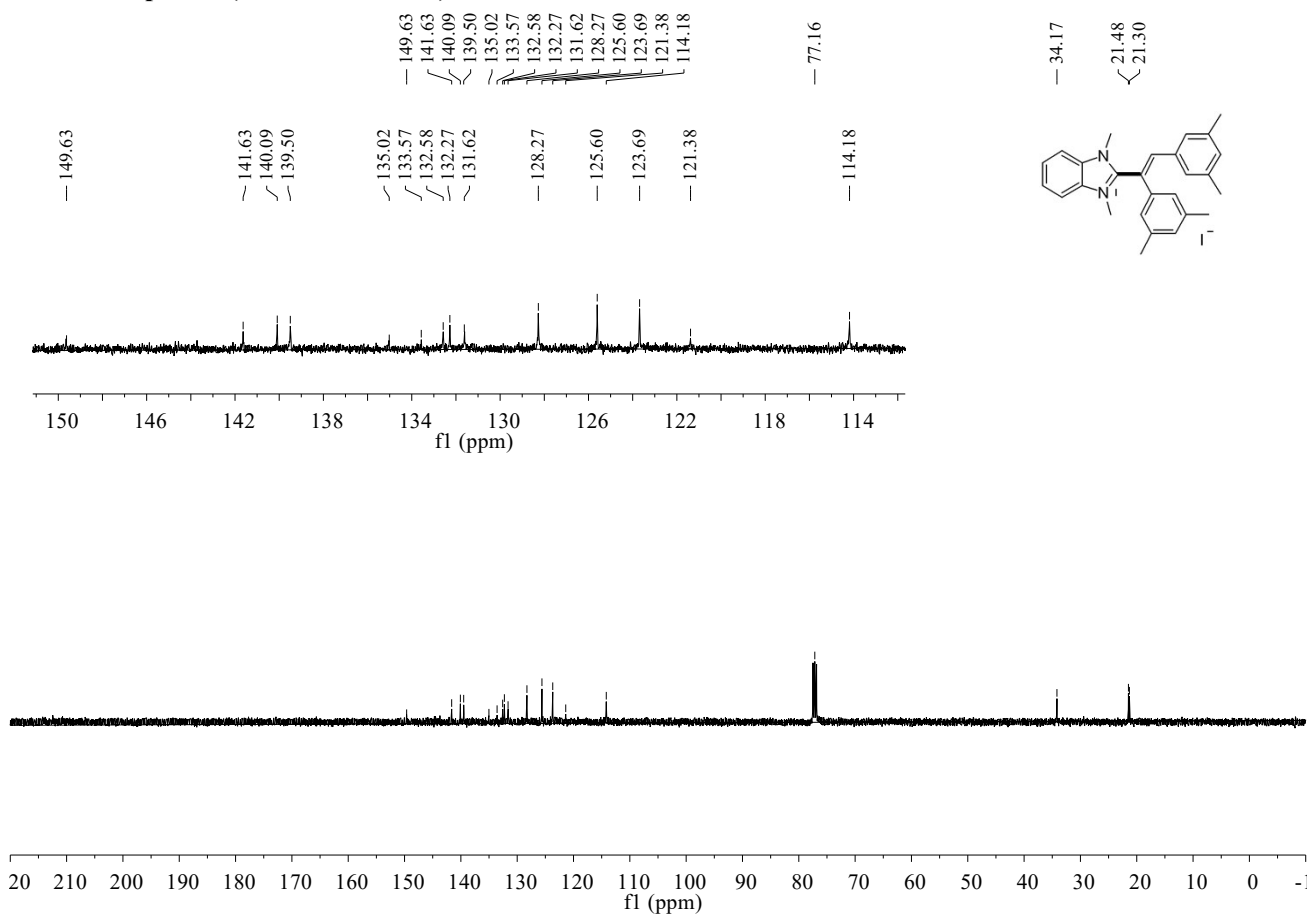

### <sup>1</sup>H NMR Spectra (400 MHz, DMSO-*d*<sub>6</sub>) of 3o

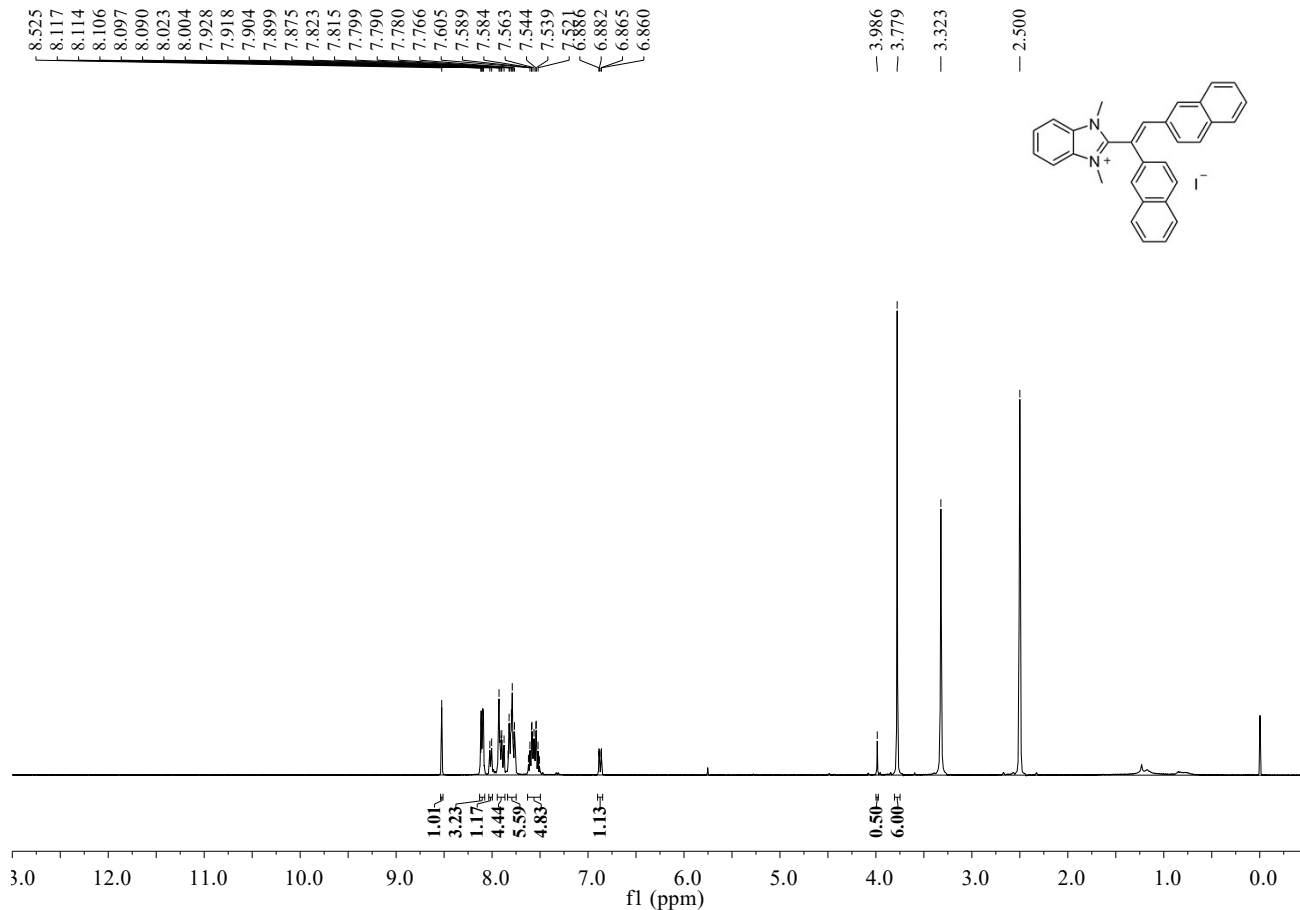

### <sup>13</sup>C NMR Spectra (100 MHz, DMSO-*d*<sub>6</sub>) of 3o

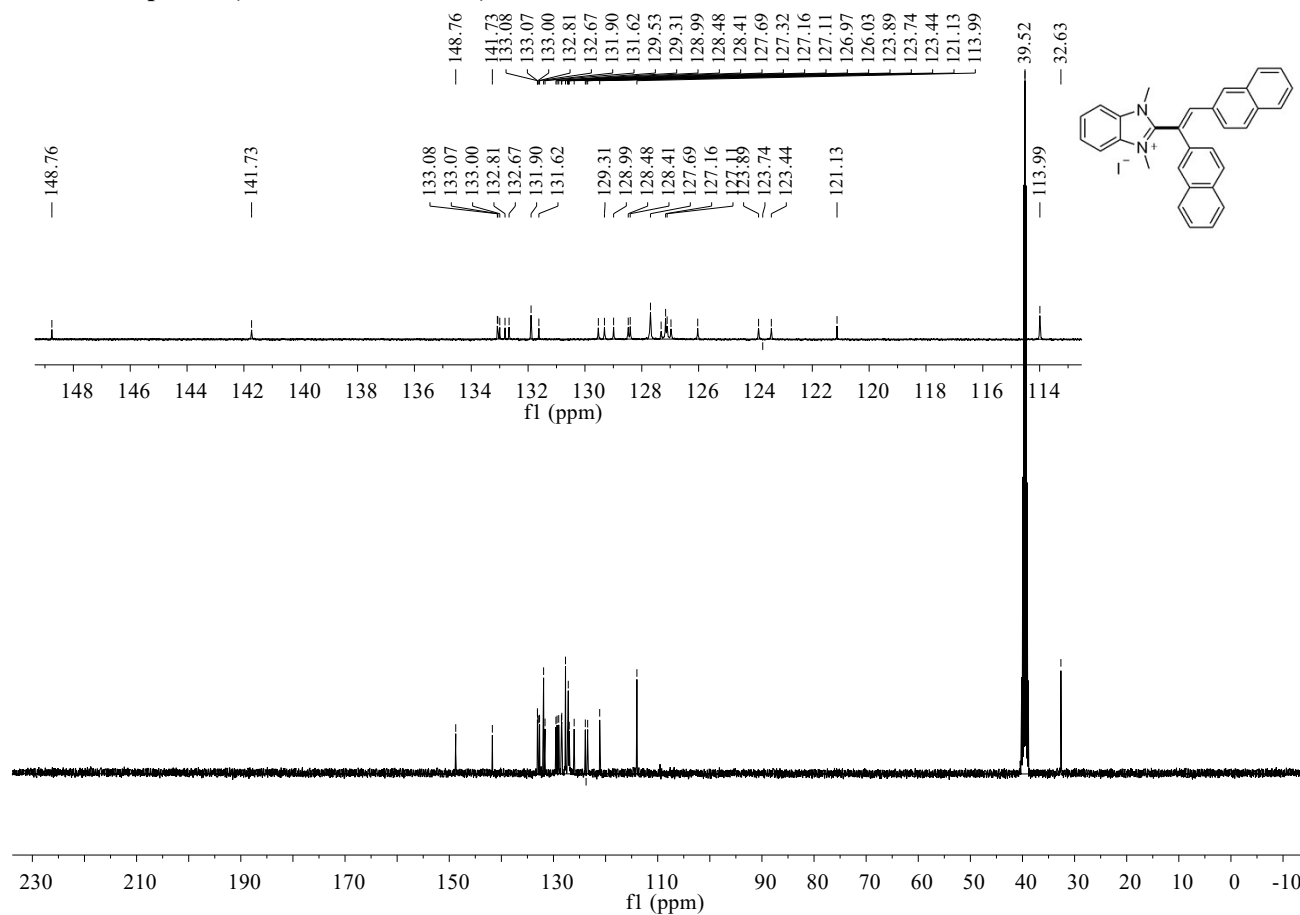

### <sup>1</sup>H NMR Spectra (400 MHz, CDCl<sub>3</sub>) of 3p

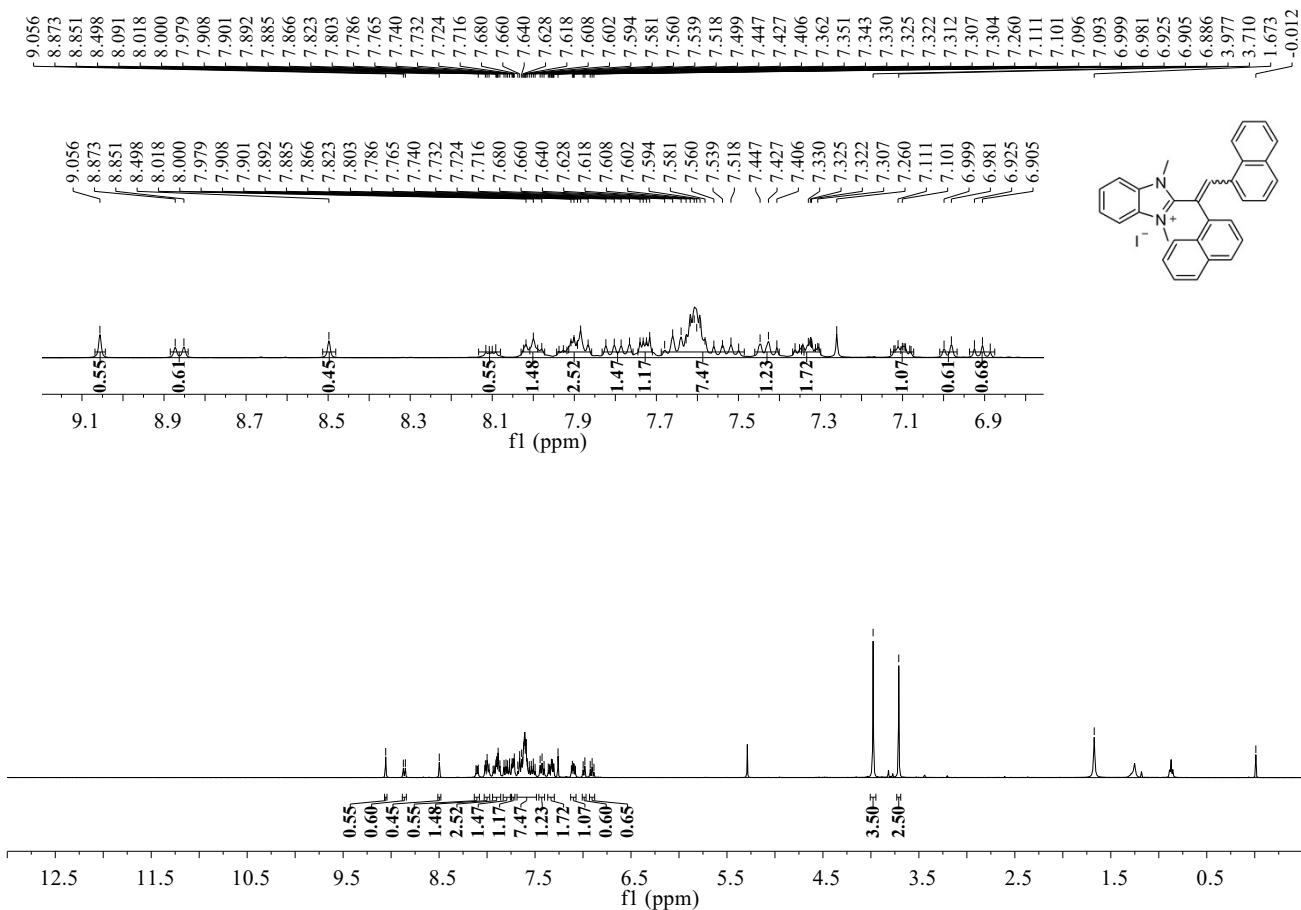

### <sup>13</sup>C NMR Spectra (100 MHz, CDCl<sub>3</sub>) of 3p

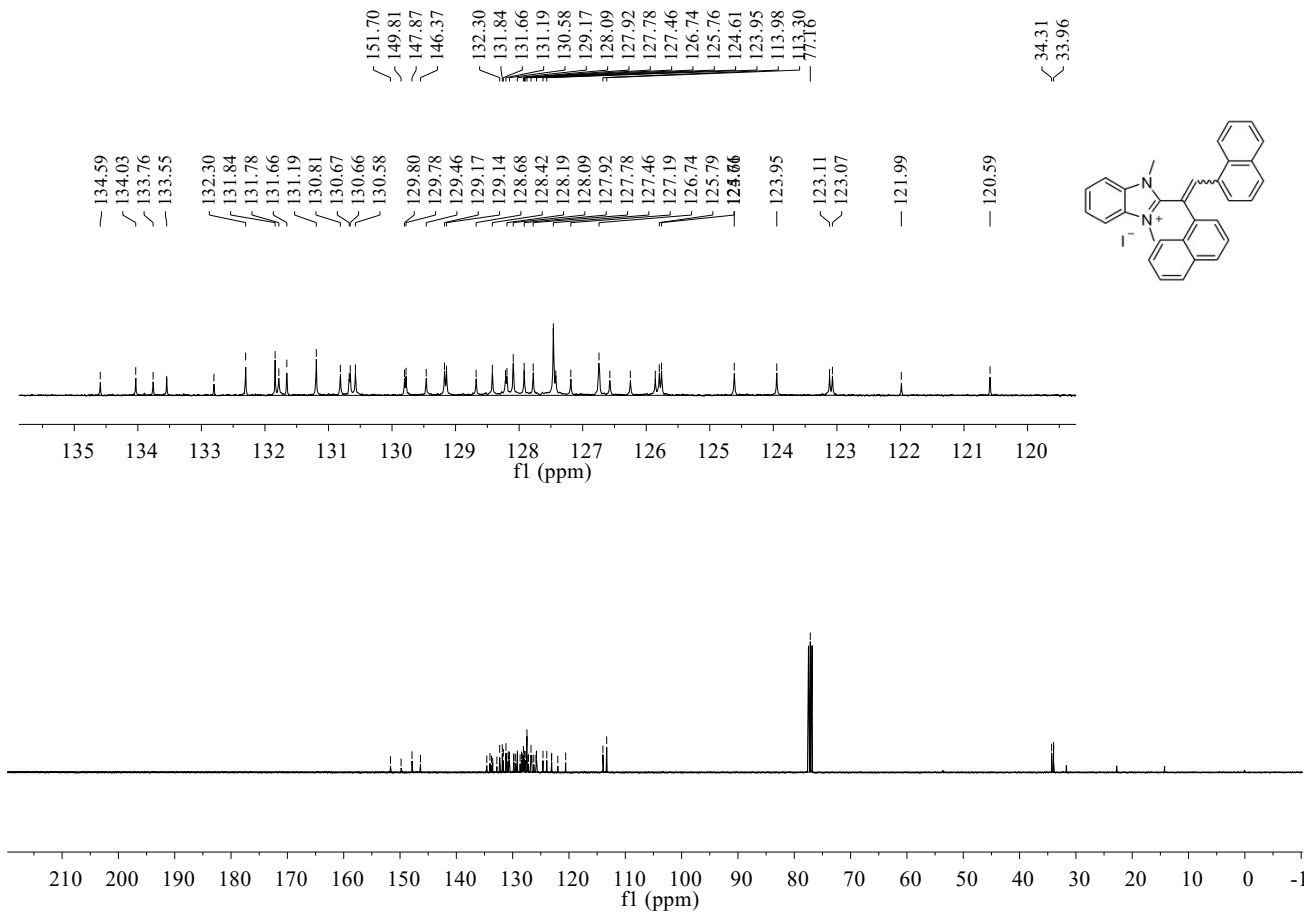

### <sup>1</sup>H NMR Spectra (400 MHz, DMSO-*d*<sub>6</sub>) of 3q

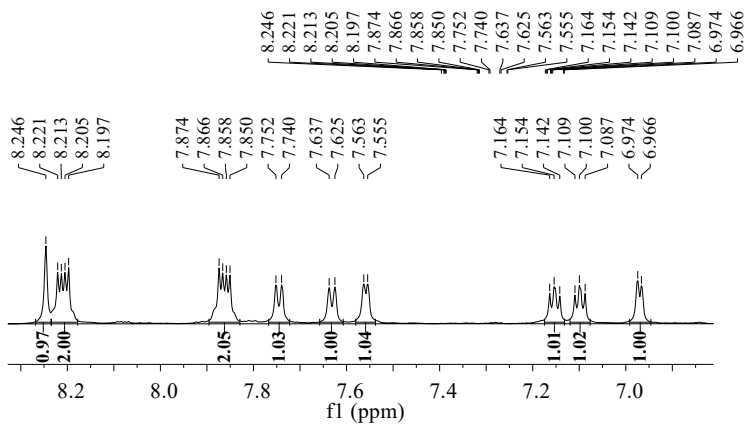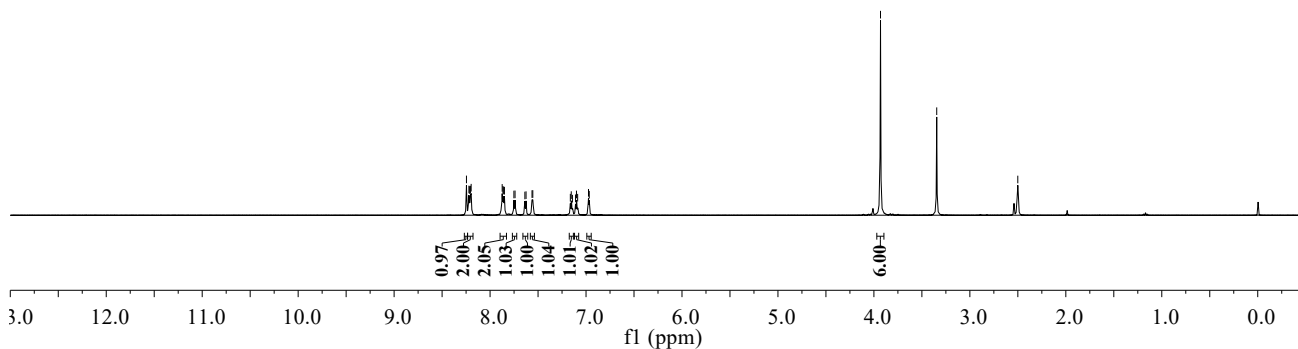

### <sup>13</sup>C NMR Spectra (100 MHz, DMSO-*d*<sub>6</sub>) of 3q

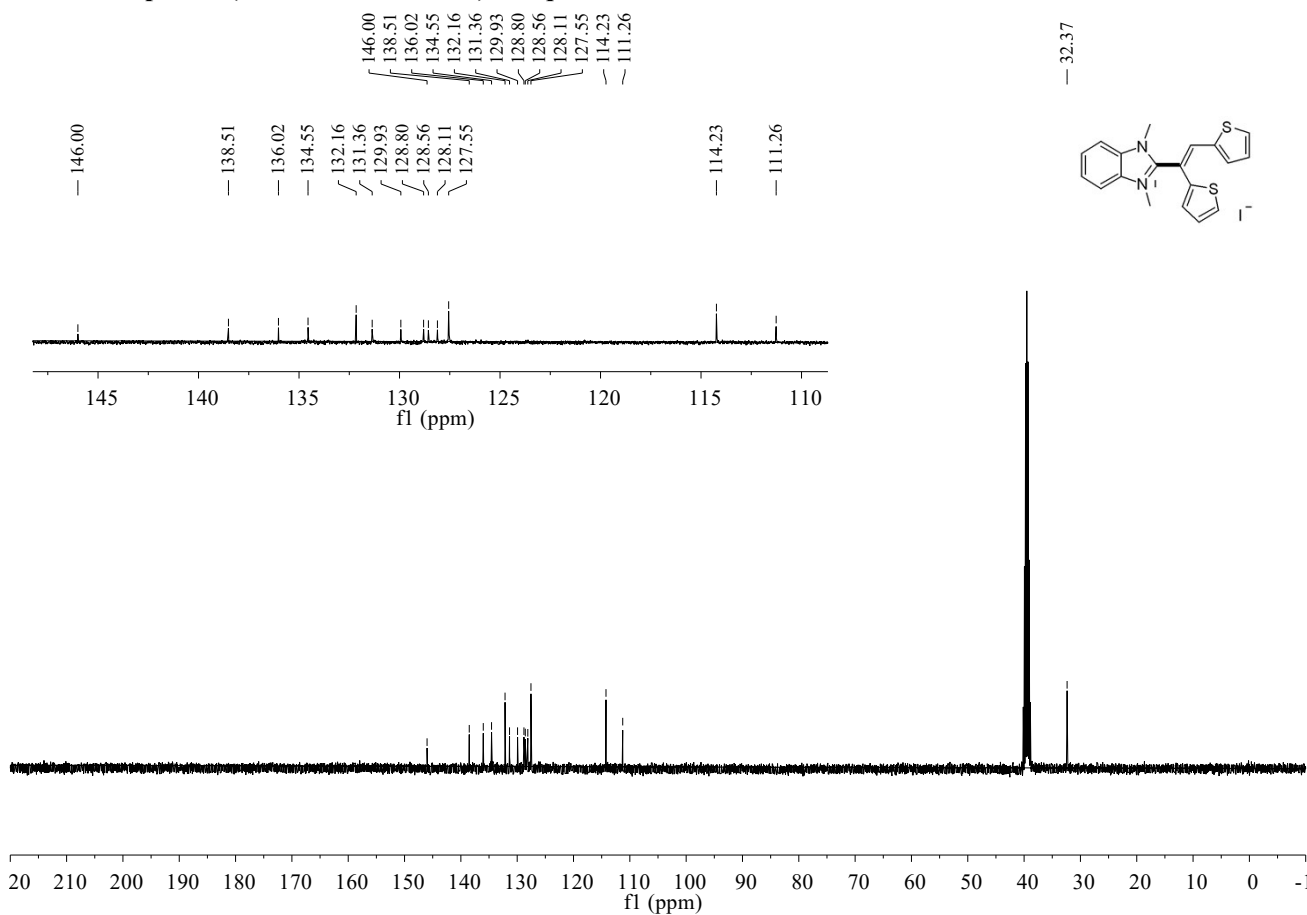

### <sup>1</sup>H NMR Spectra (400 MHz, DMSO-*d*<sub>6</sub>) of 3r

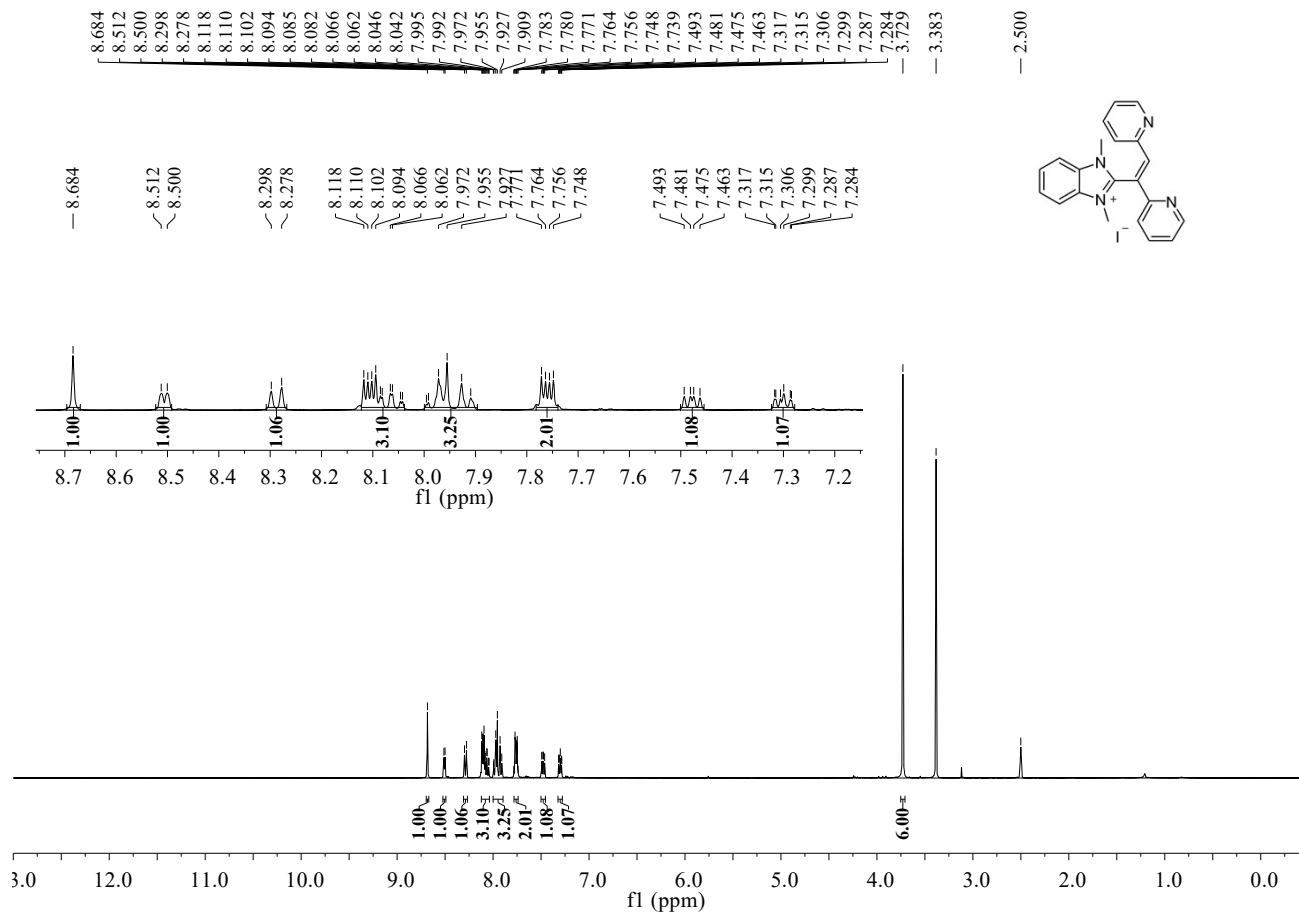

### <sup>13</sup>C NMR Spectra (100 MHz, CDCl<sub>3</sub>) of 3r

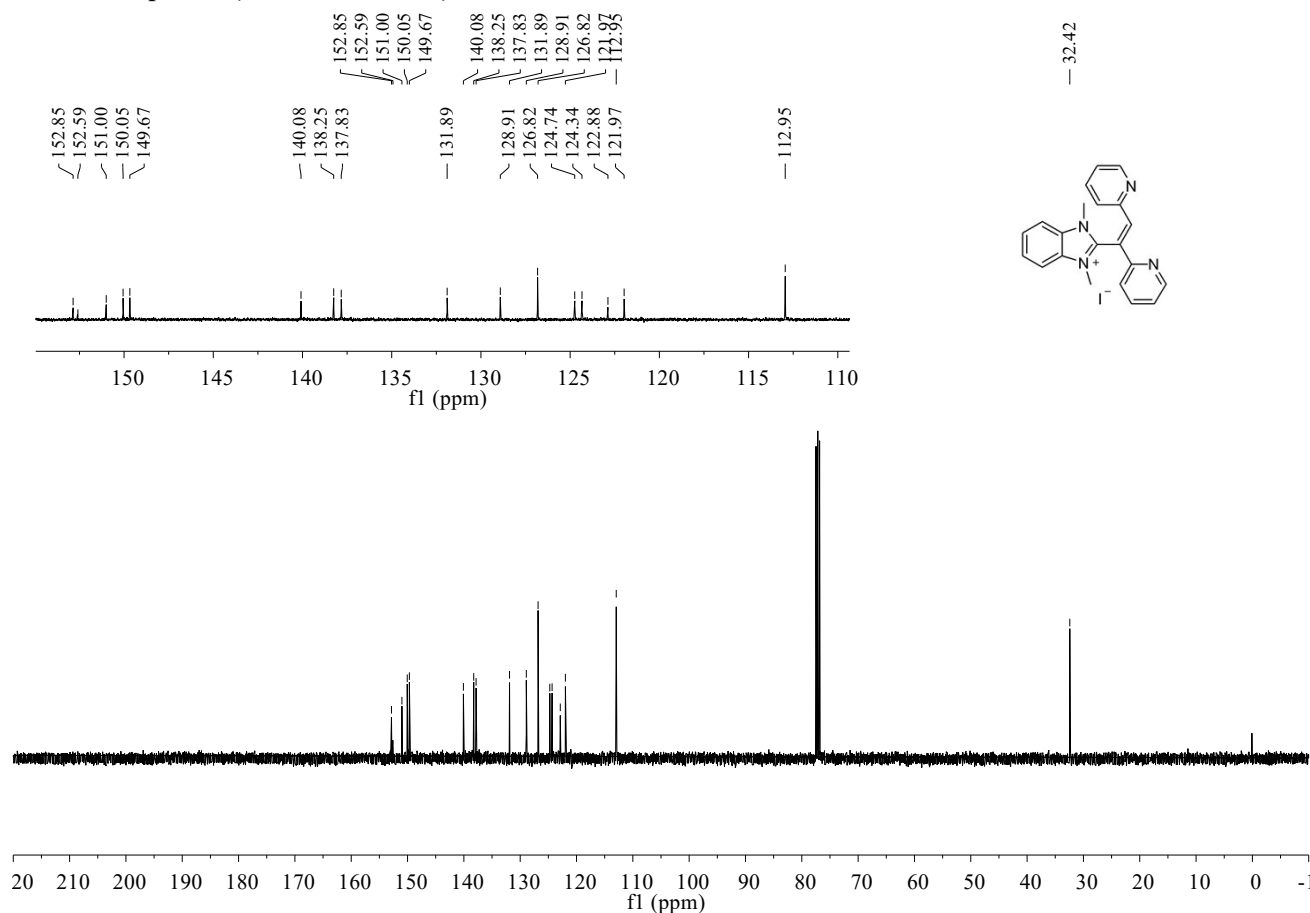

**<sup>1</sup>H NMR Spectra (400 MHz, DMSO-*d*<sub>6</sub>) of 4a**

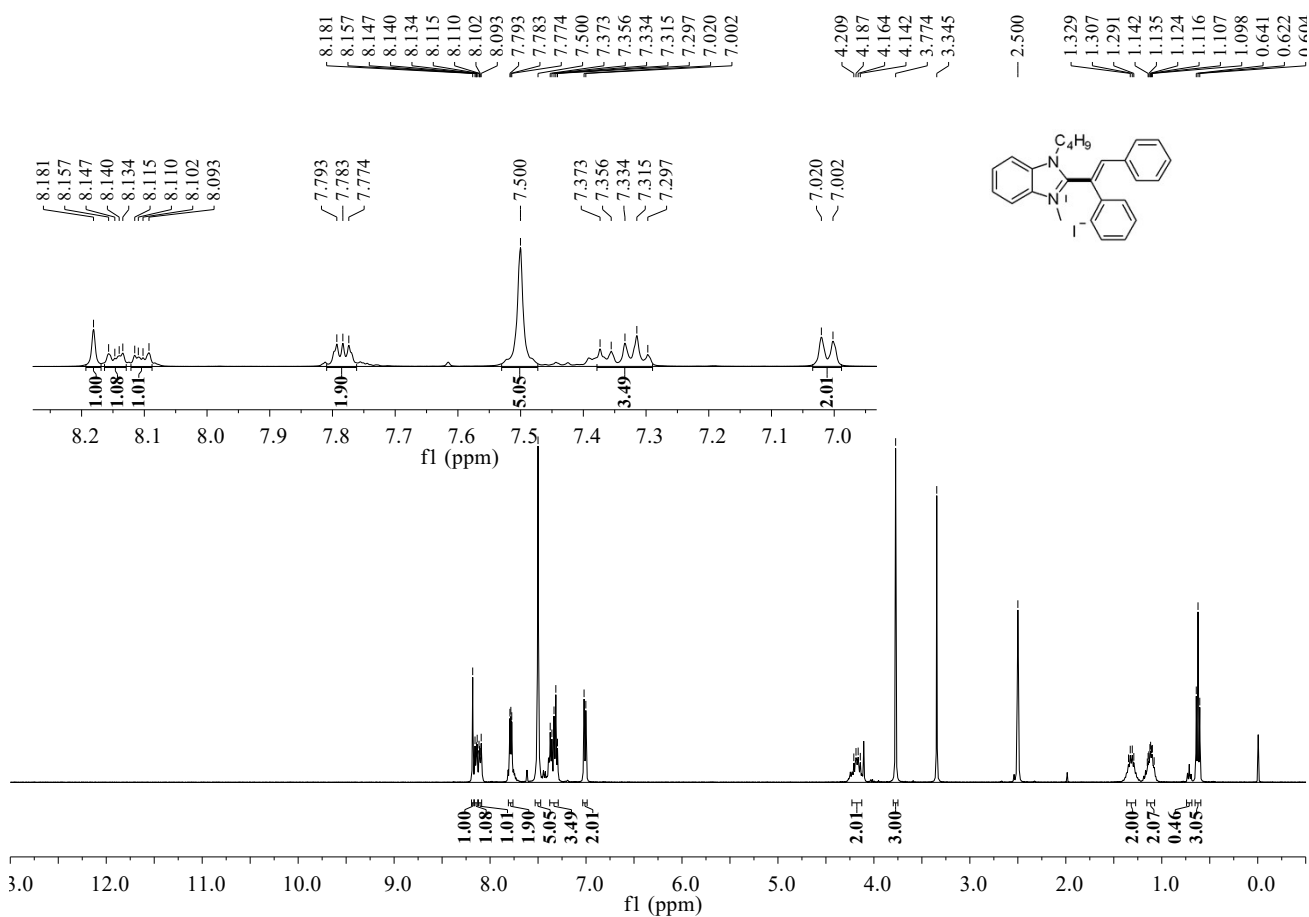

**<sup>13</sup>C NMR Spectra (100 MHz, CDCl<sub>3</sub>) of 4a**

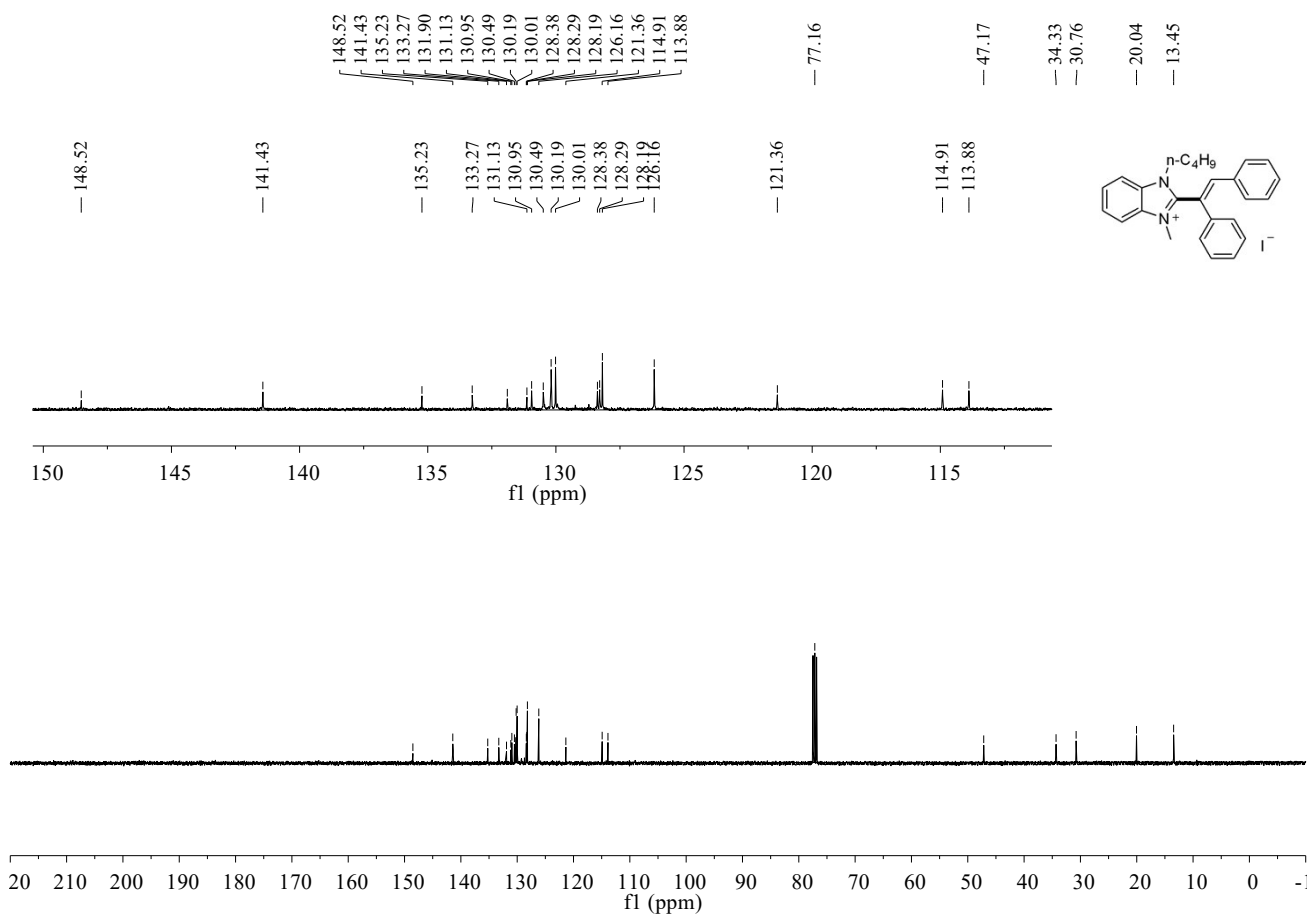



### <sup>1</sup>H NMR Spectra (400 MHz, DMSO-*d*<sub>6</sub>) of 4b

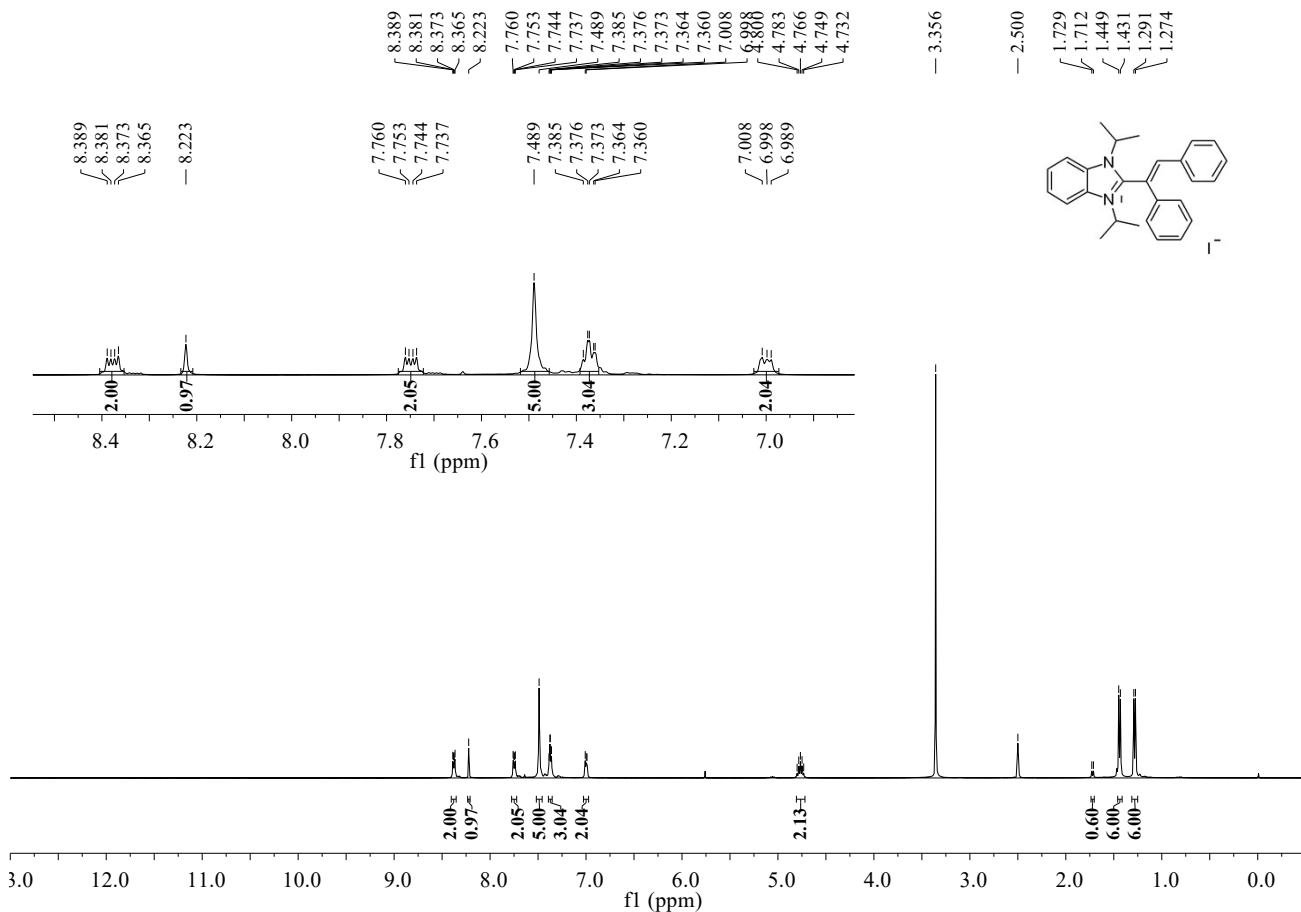

### <sup>13</sup>C NMR Spectra (100 MHz, DMSO-*d*<sub>6</sub>) of 4b

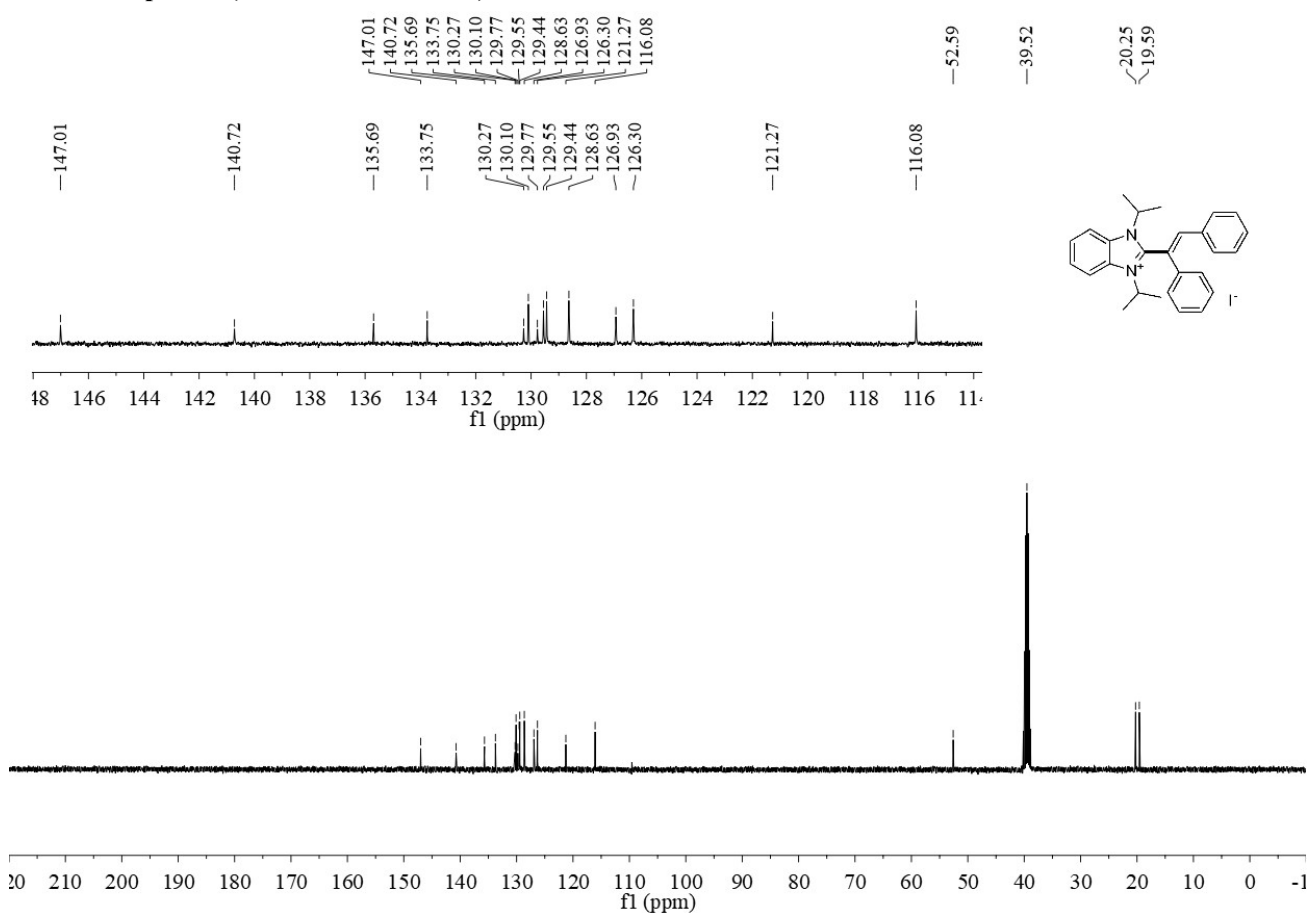

### <sup>1</sup>H NMR Spectra (400 MHz, DMSO-*d*<sub>6</sub>) of 4c

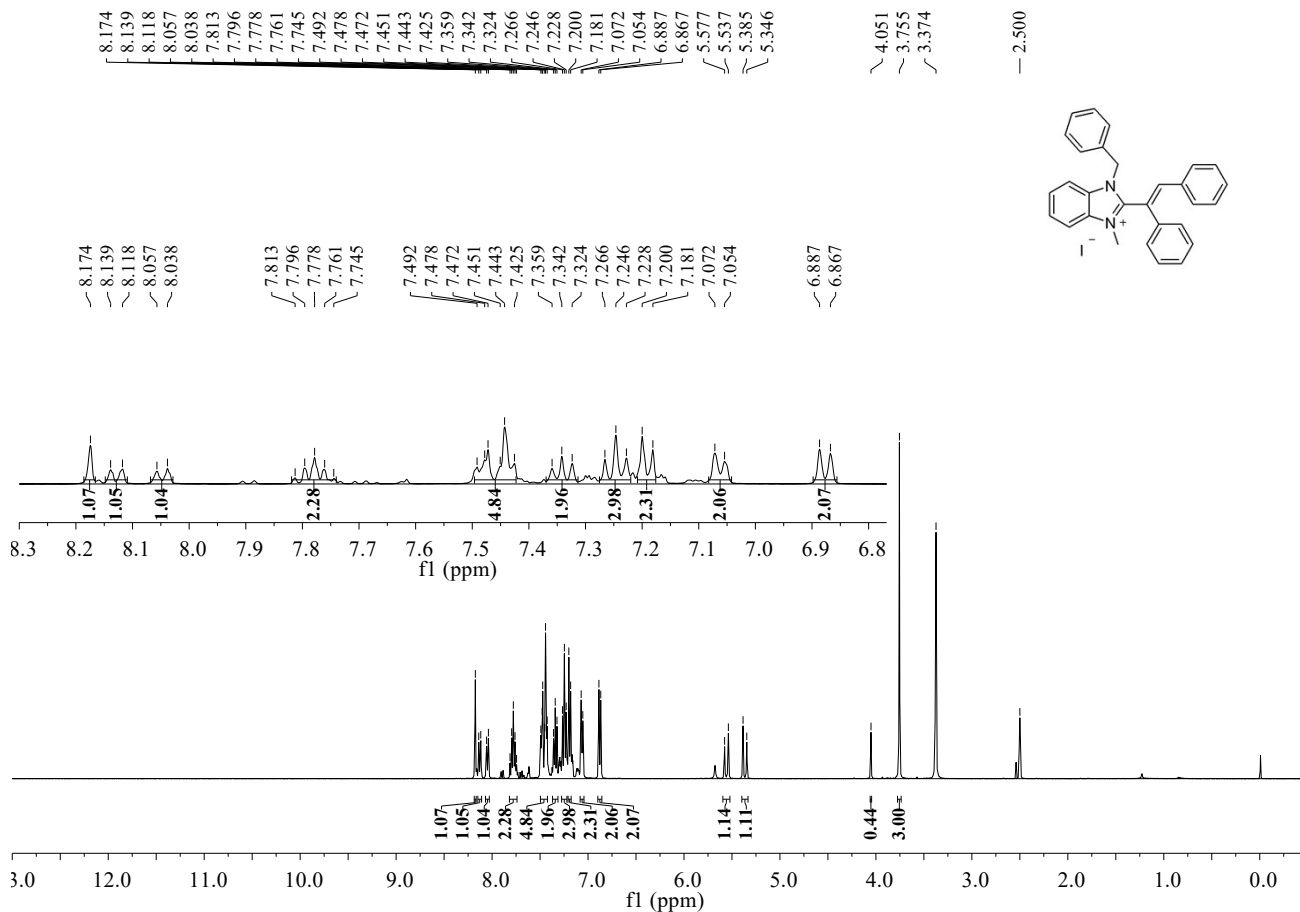

### <sup>13</sup>C NMR Spectra (100 MHz, DMSO-*d*<sub>6</sub>) of 4c

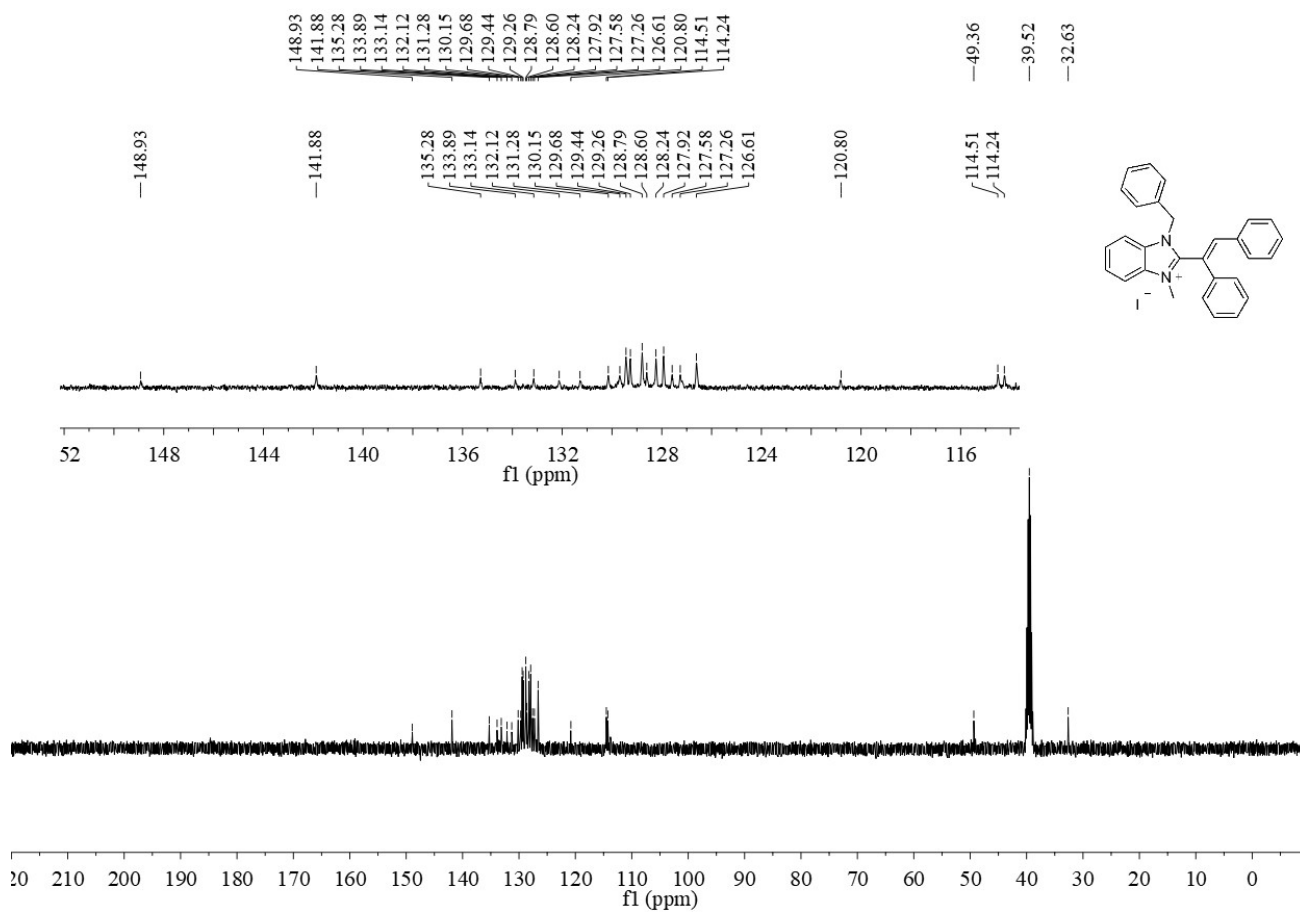

### $^1\text{H}$ NMR Spectra (400 MHz, $\text{CDCl}_3$ ) of 4d

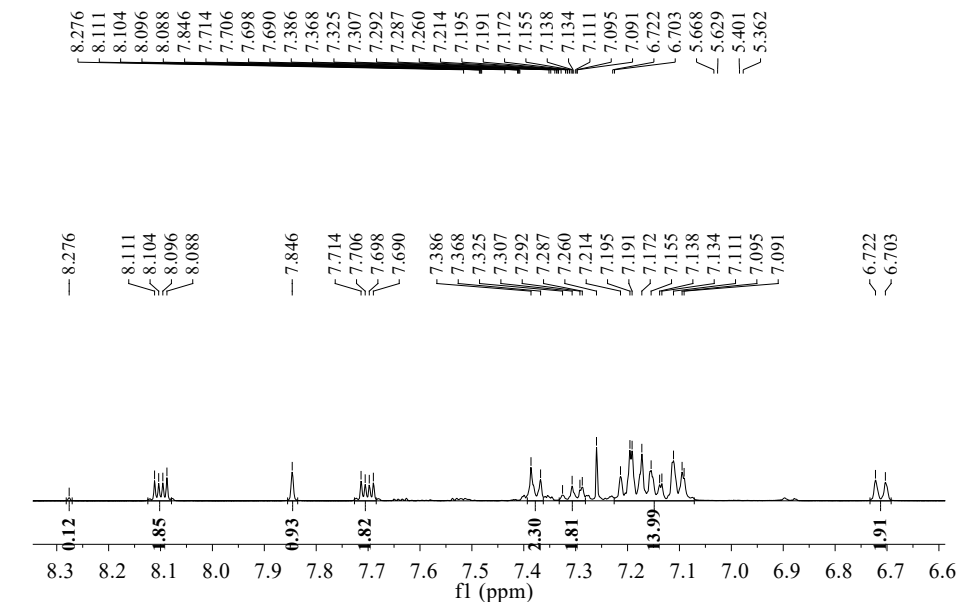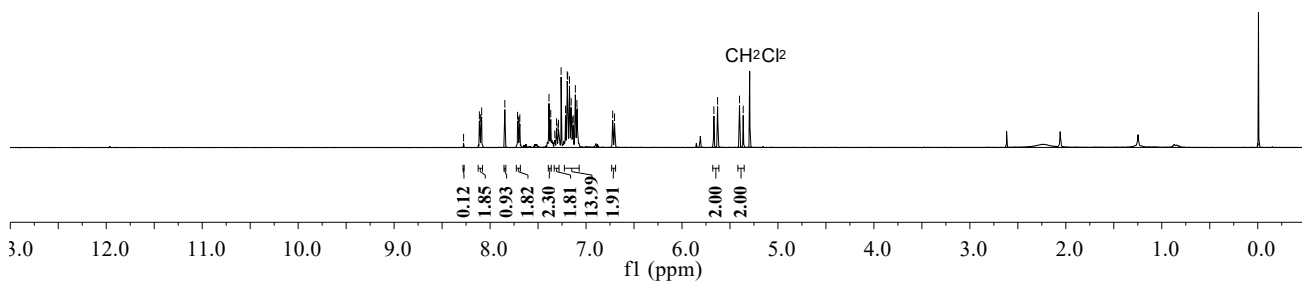

### $^{13}\text{C}$ NMR Spectra (100 MHz, $\text{CDCl}_3$ ) of 4d

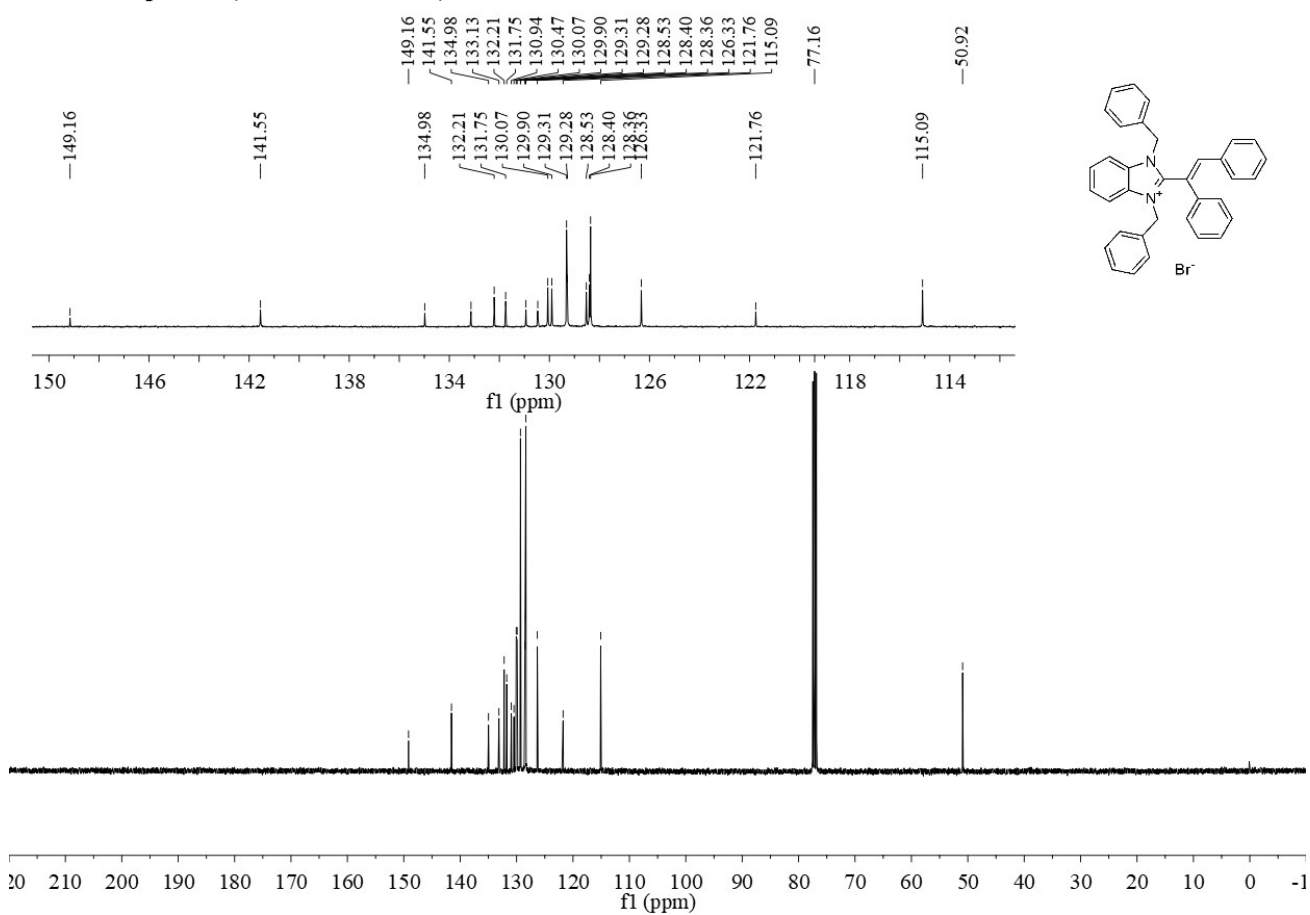

**<sup>1</sup>H NMR Spectra (400 MHz, DMSO-*d*<sub>6</sub>) of 4e**

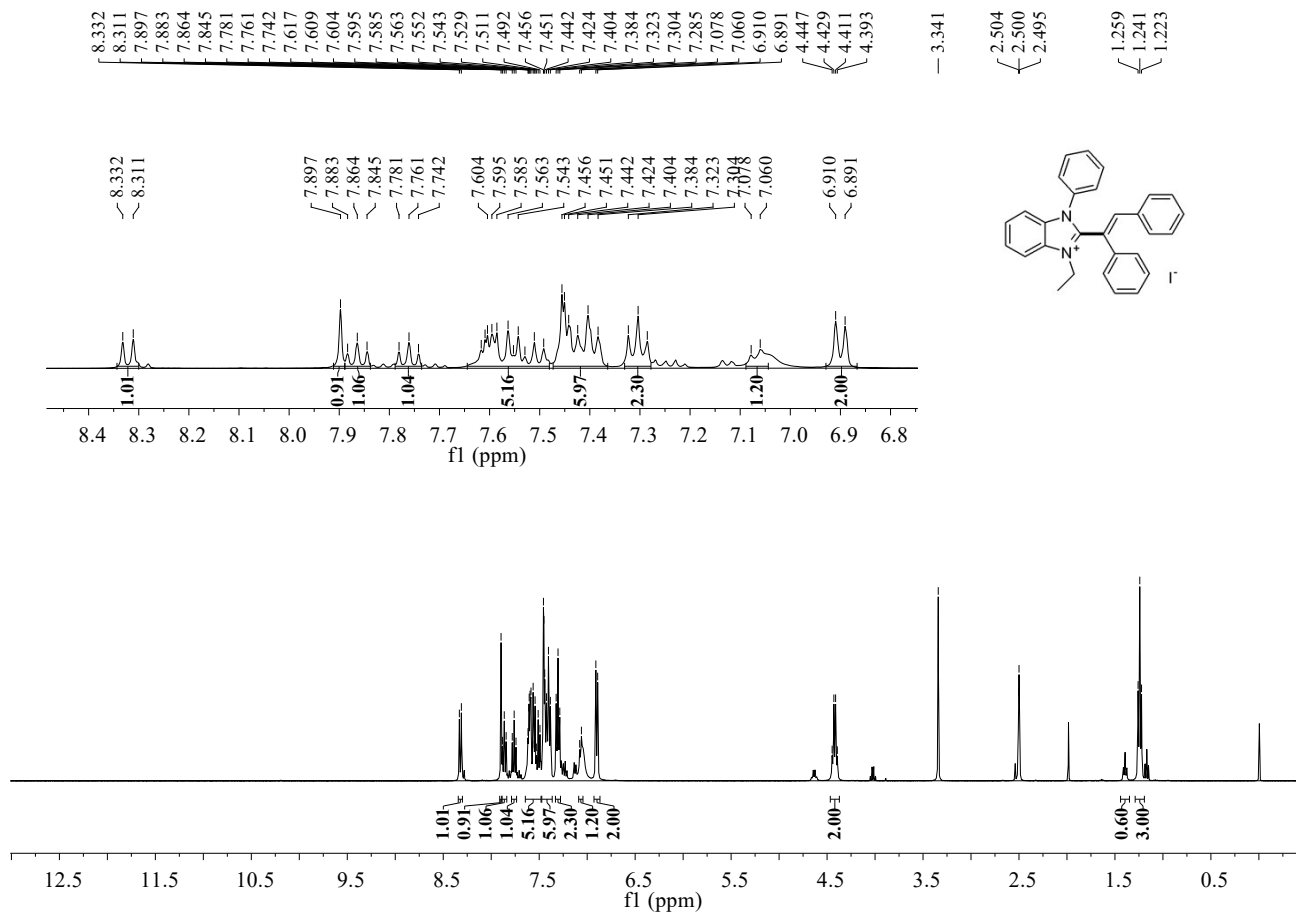

**<sup>13</sup>C NMR Spectra (100 MHz, DMSO-*d*<sub>6</sub>) of 4e**

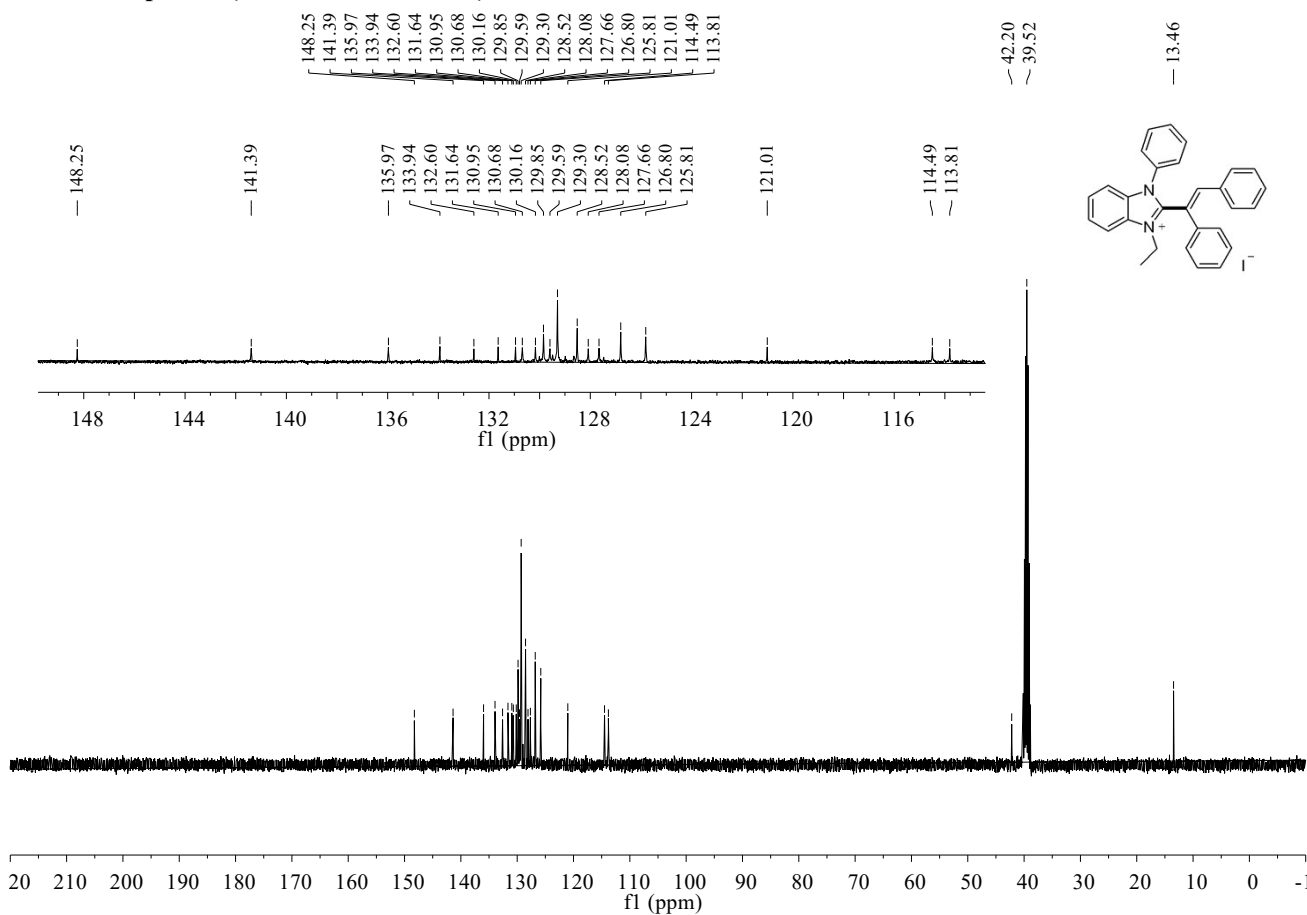

### <sup>1</sup>H NMR Spectra (400 MHz, DMSO-*d*<sub>6</sub>) of 4f

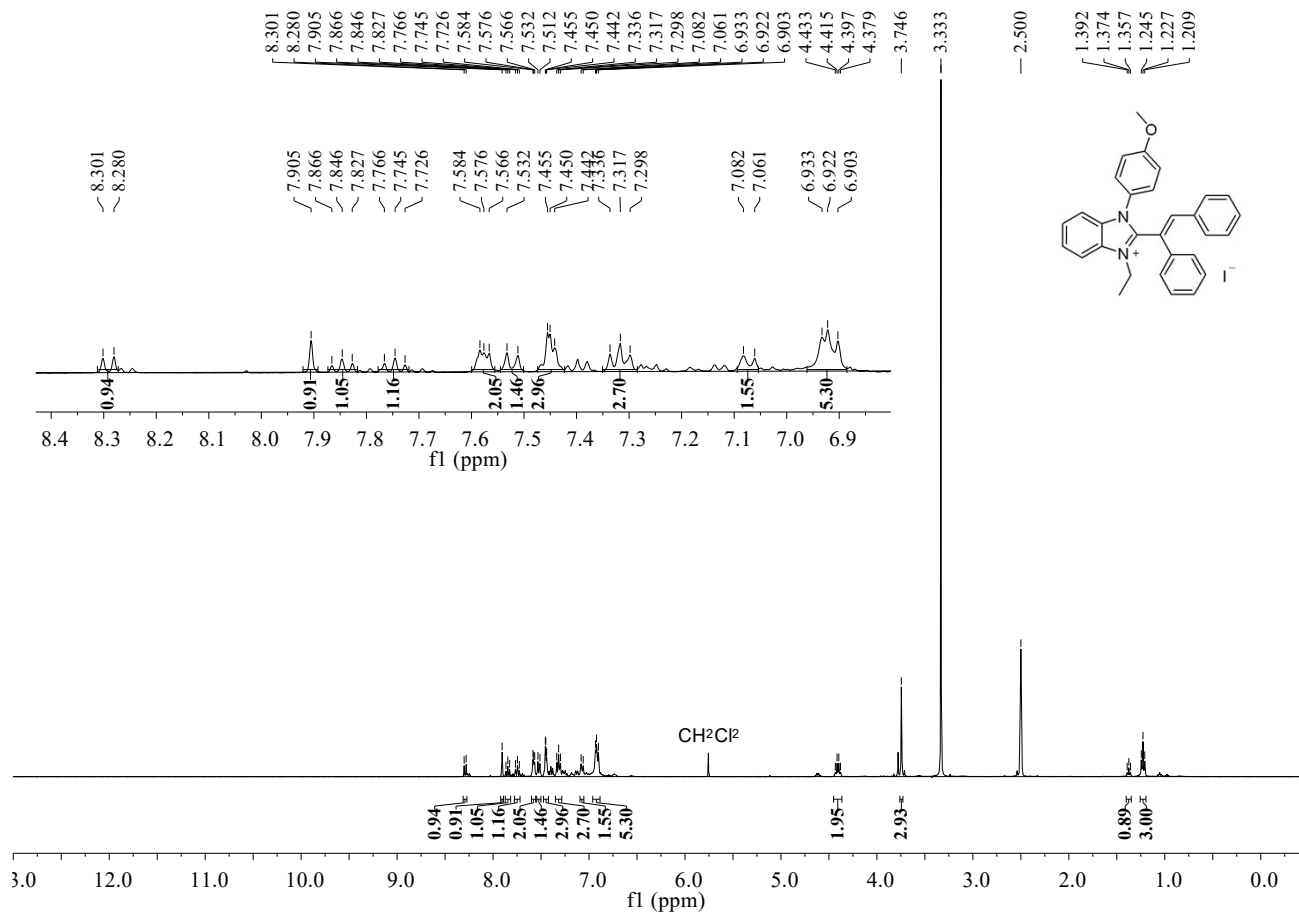

### <sup>13</sup>C NMR Spectra (100 MHz, DMSO-*d*<sub>6</sub>) of 4f

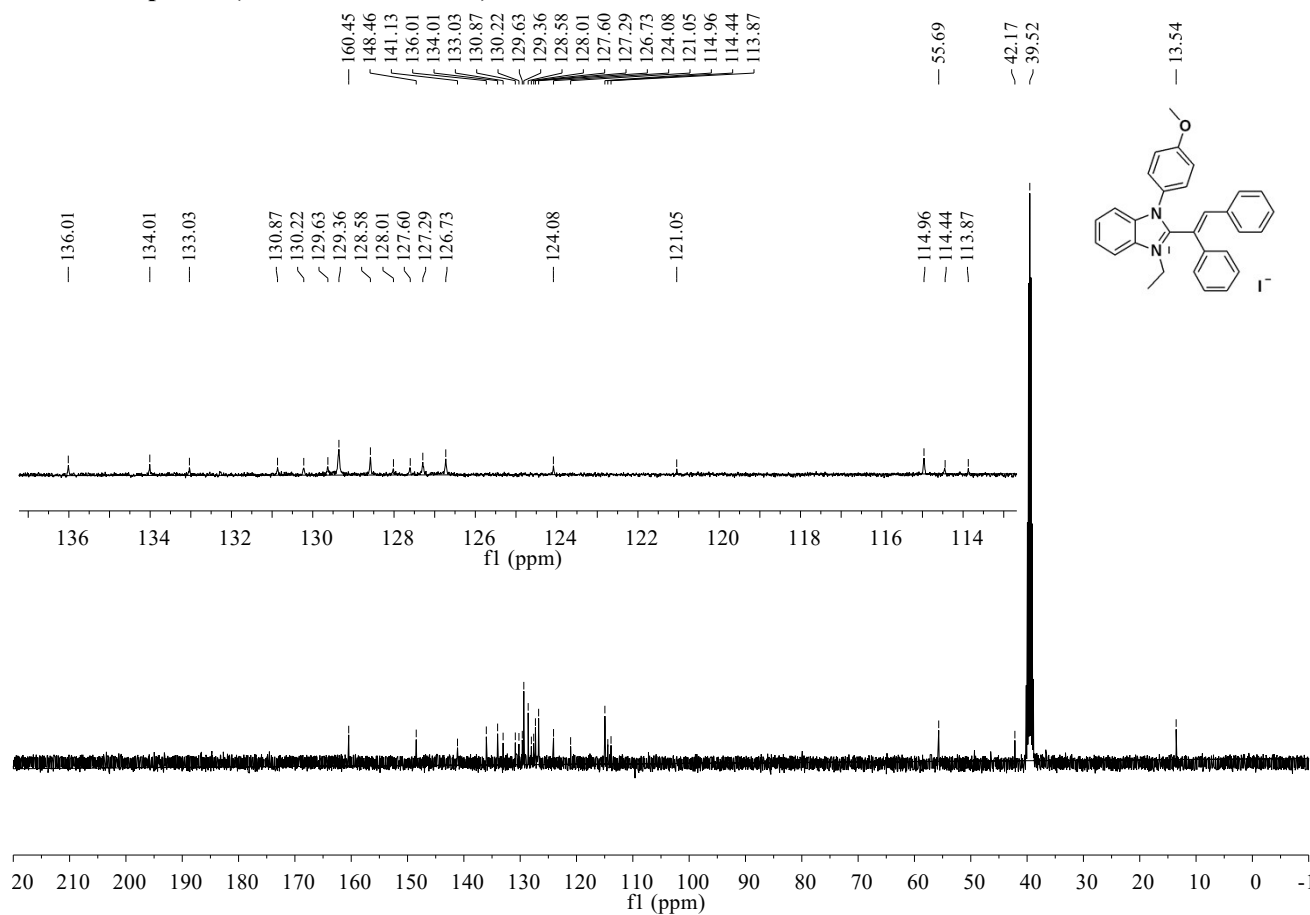

### <sup>1</sup>H NMR Spectra (400 MHz, DMSO-d<sub>6</sub>) of 4g

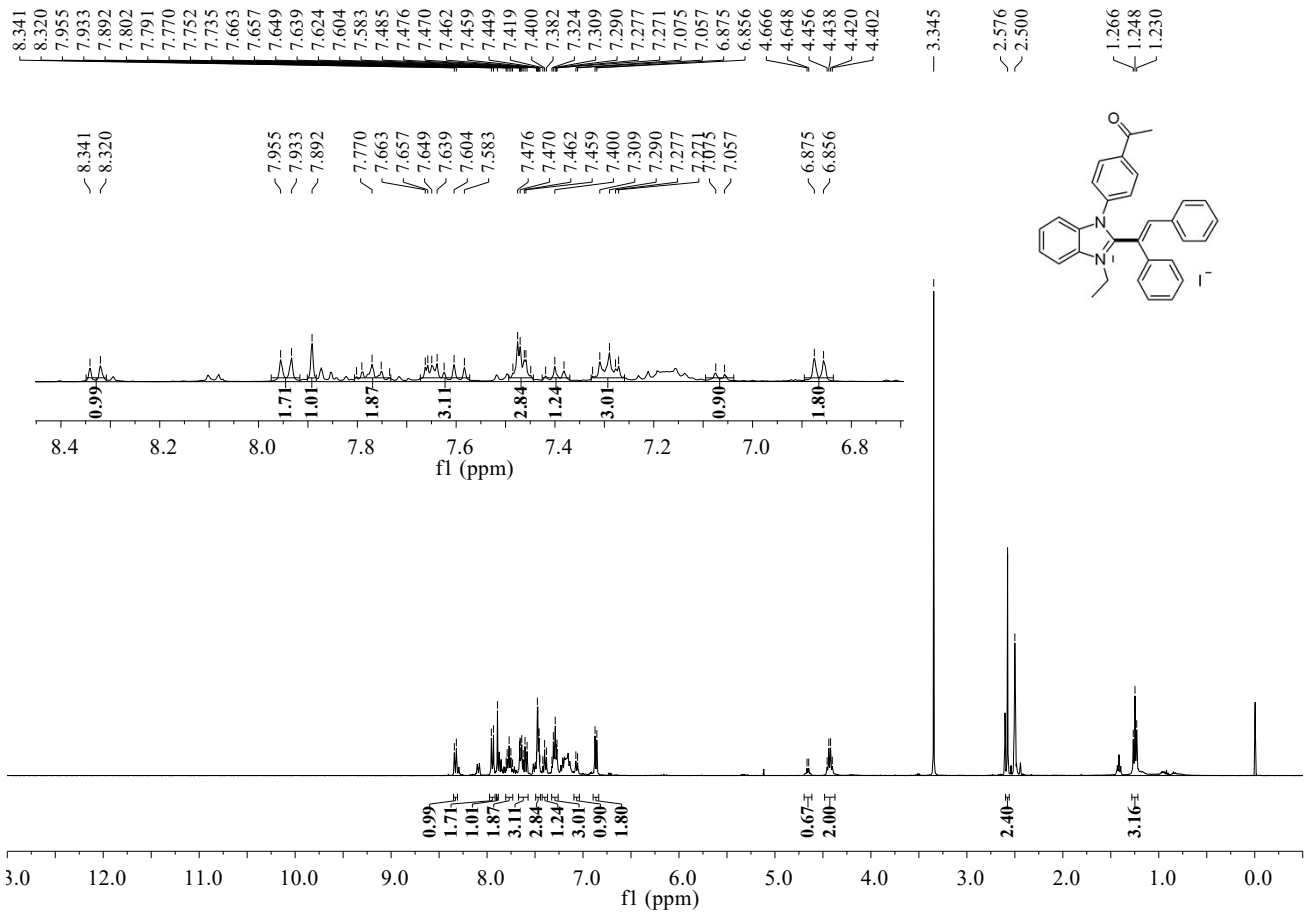

### <sup>13</sup>C NMR Spectra (100 MHz, DMSO-d<sub>6</sub>) of 4g

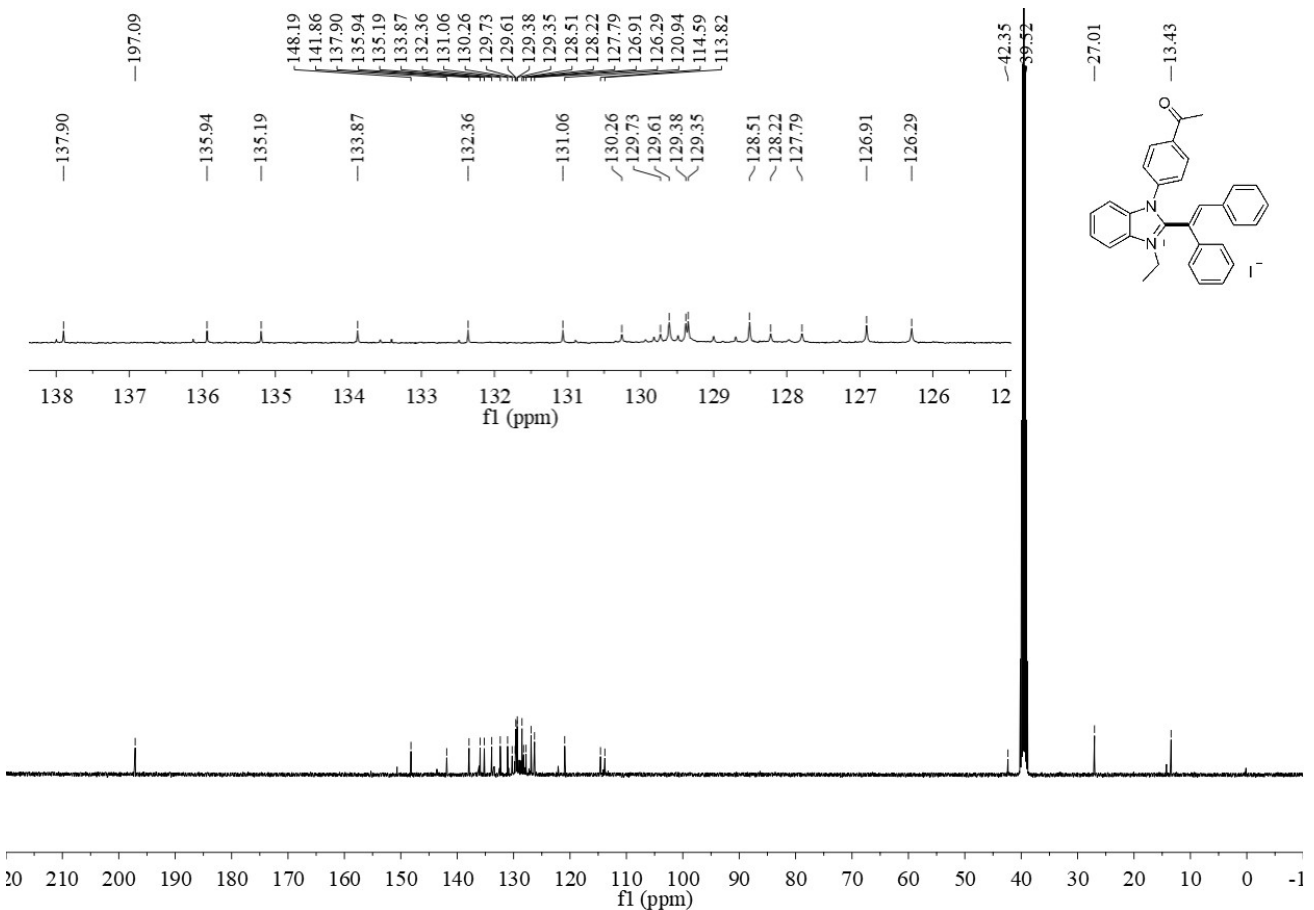

### <sup>1</sup>H NMR Spectra (400 MHz, DMSO-d<sub>6</sub>) of 4h

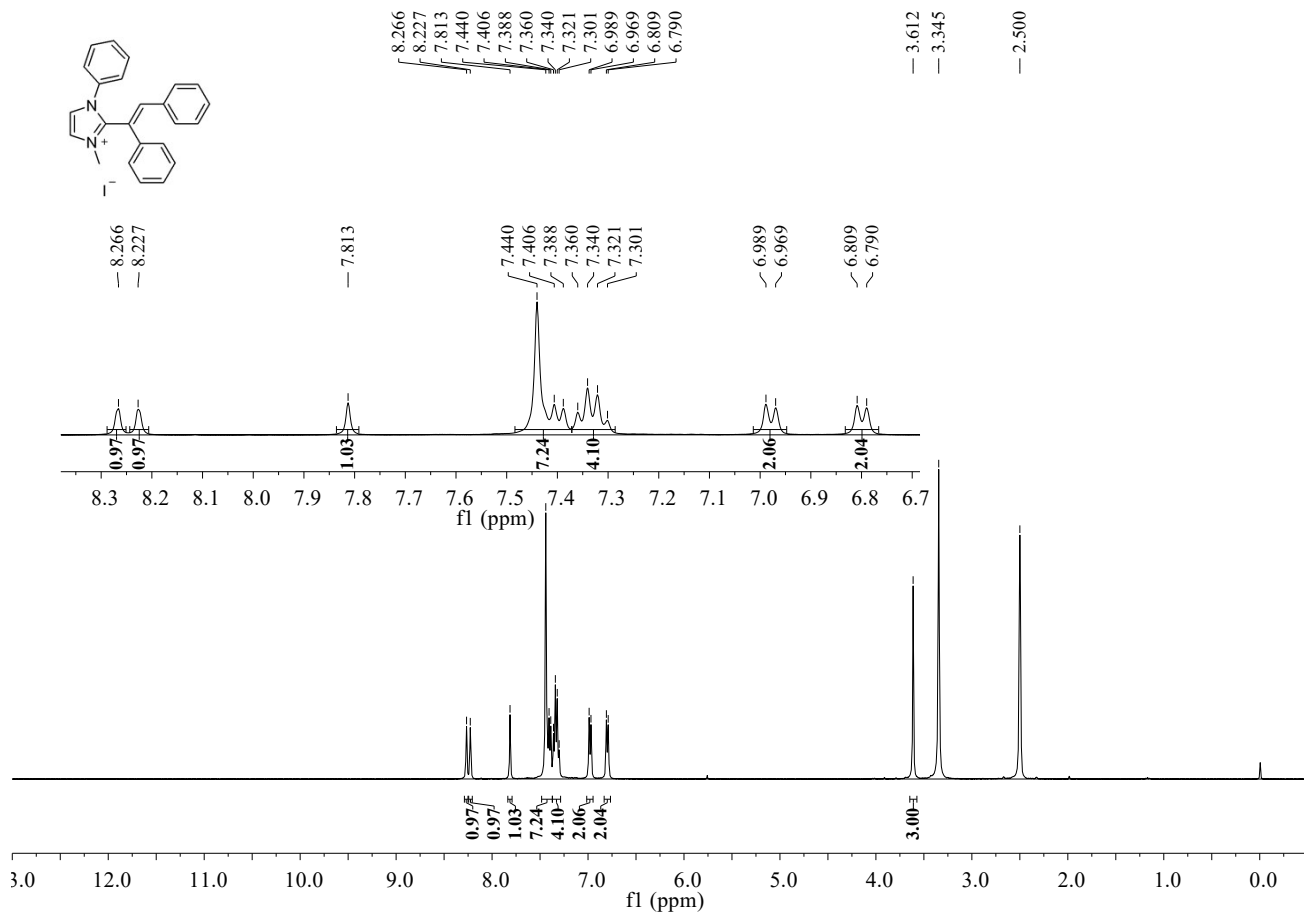

### <sup>13</sup>C NMR Spectra (100 MHz, DMSO-d<sub>6</sub>) of 4h

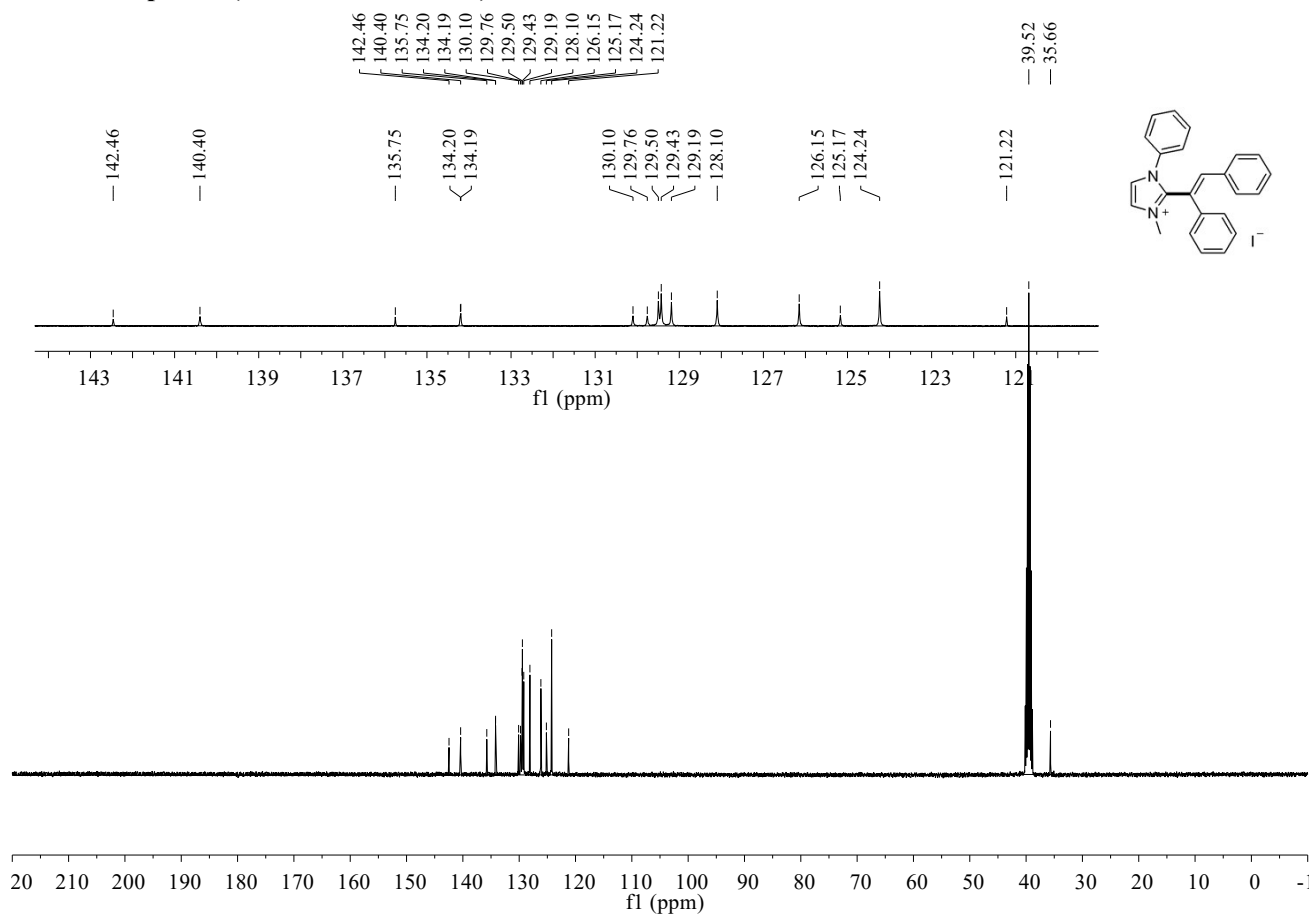

### <sup>1</sup>H NMR Spectra (400 MHz, DMSO-*d*<sub>6</sub>) of 4i

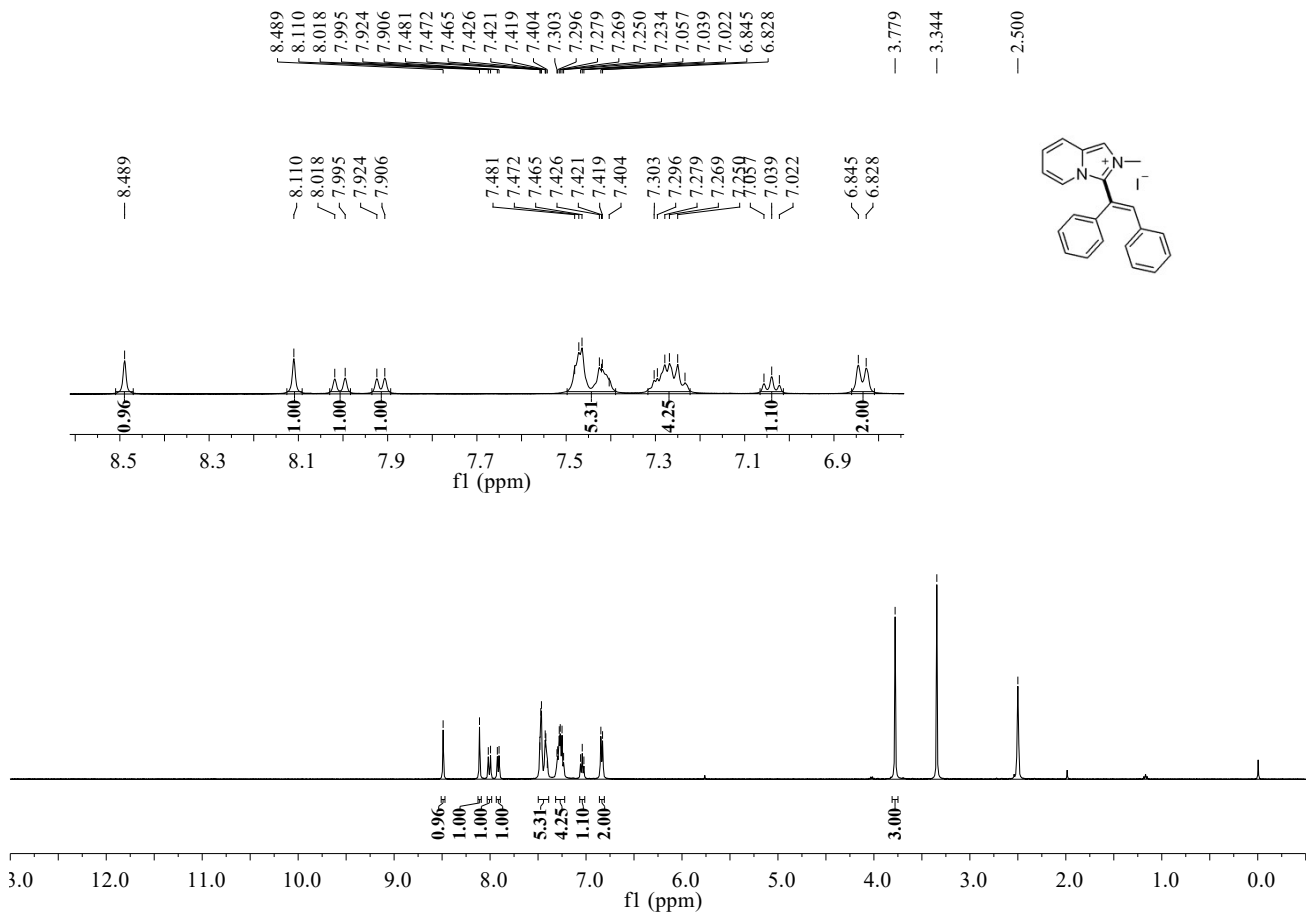

### <sup>13</sup>C NMR Spectra (100 MHz, DMSO-*d*<sub>6</sub>) of 4i

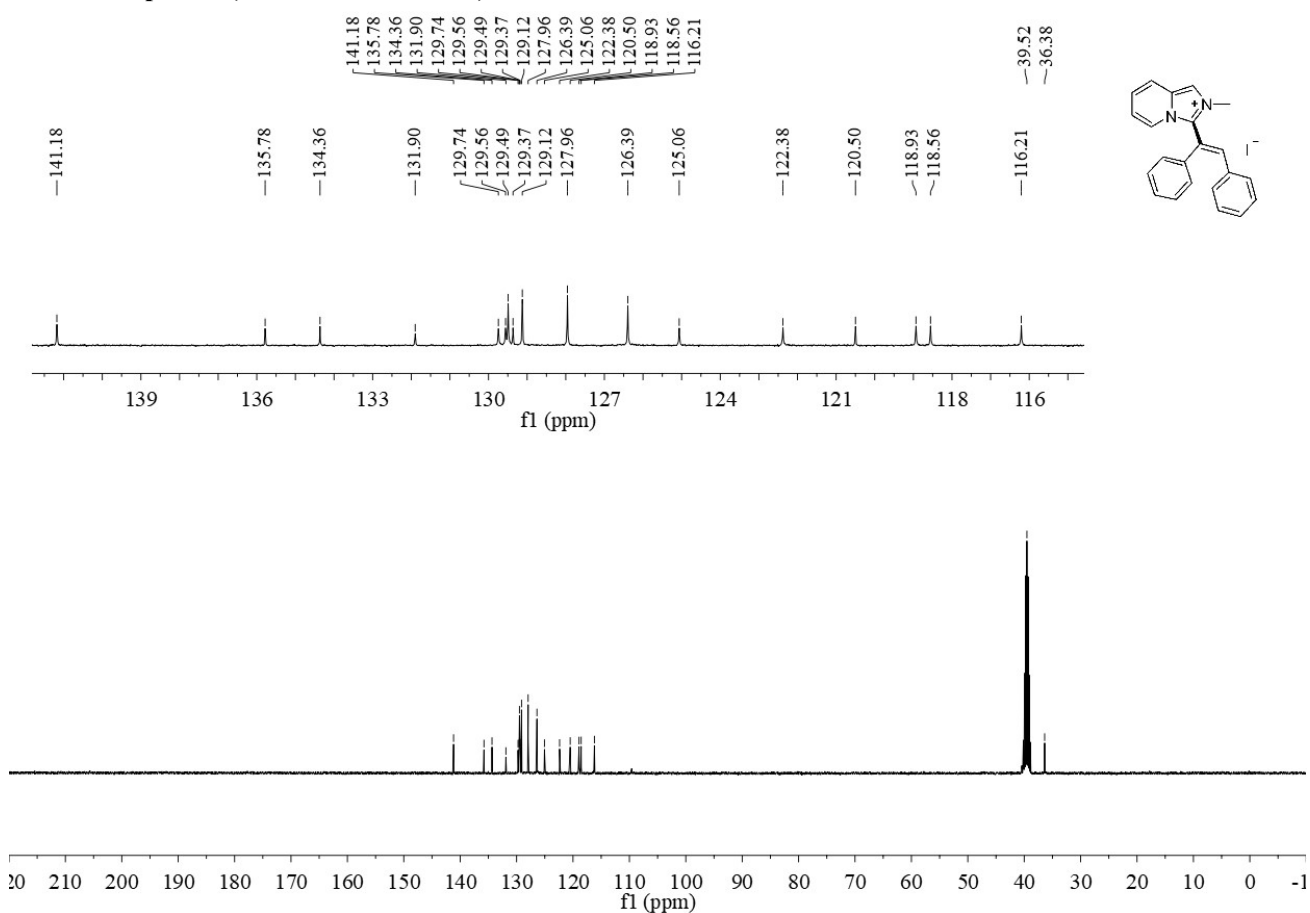



**<sup>1</sup>H NMR Spectra (400 MHz, CDCl<sub>3</sub>) of 5**

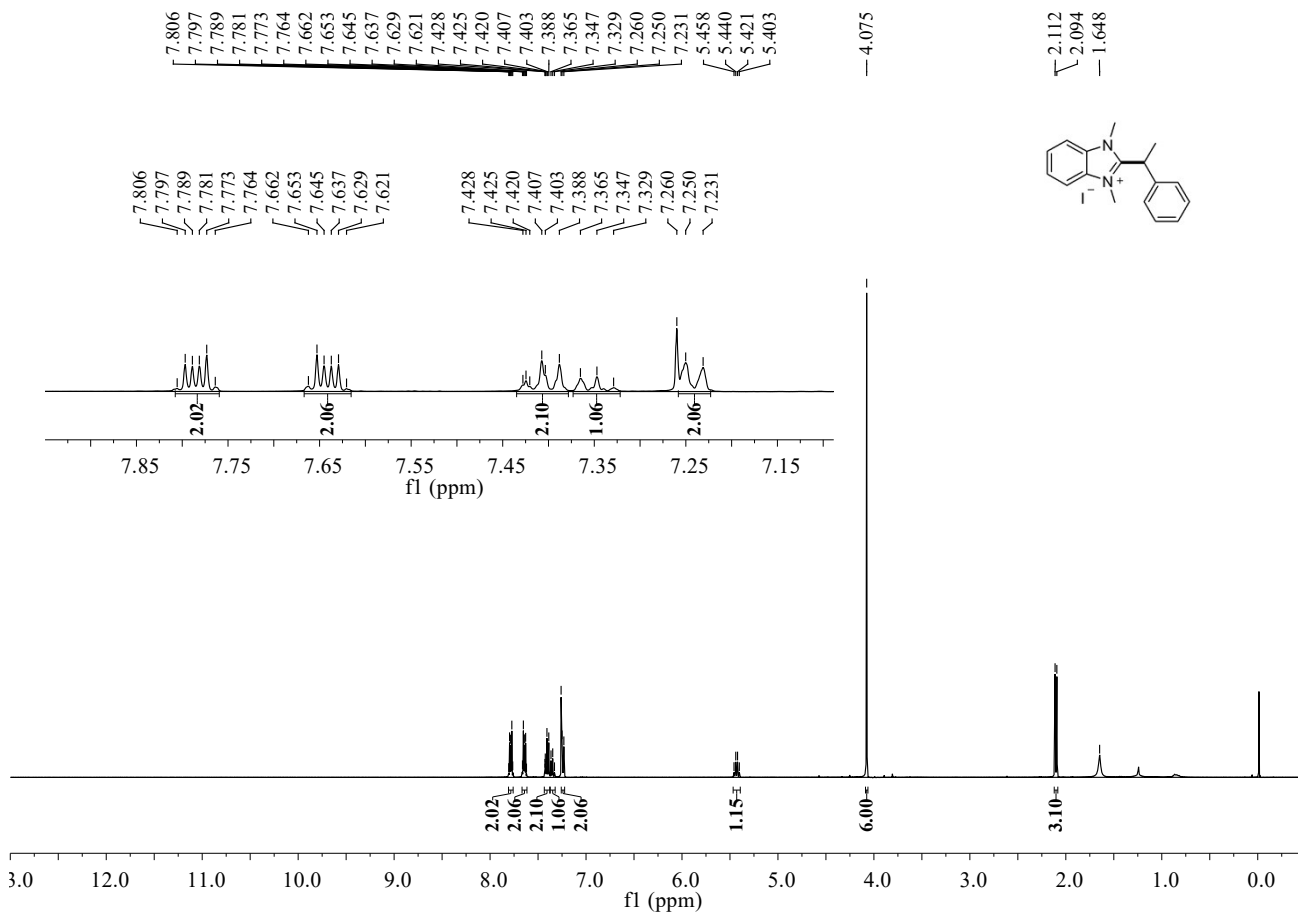

**<sup>13</sup>C NMR Spectra (100 MHz, CDCl<sub>3</sub>) of 5**

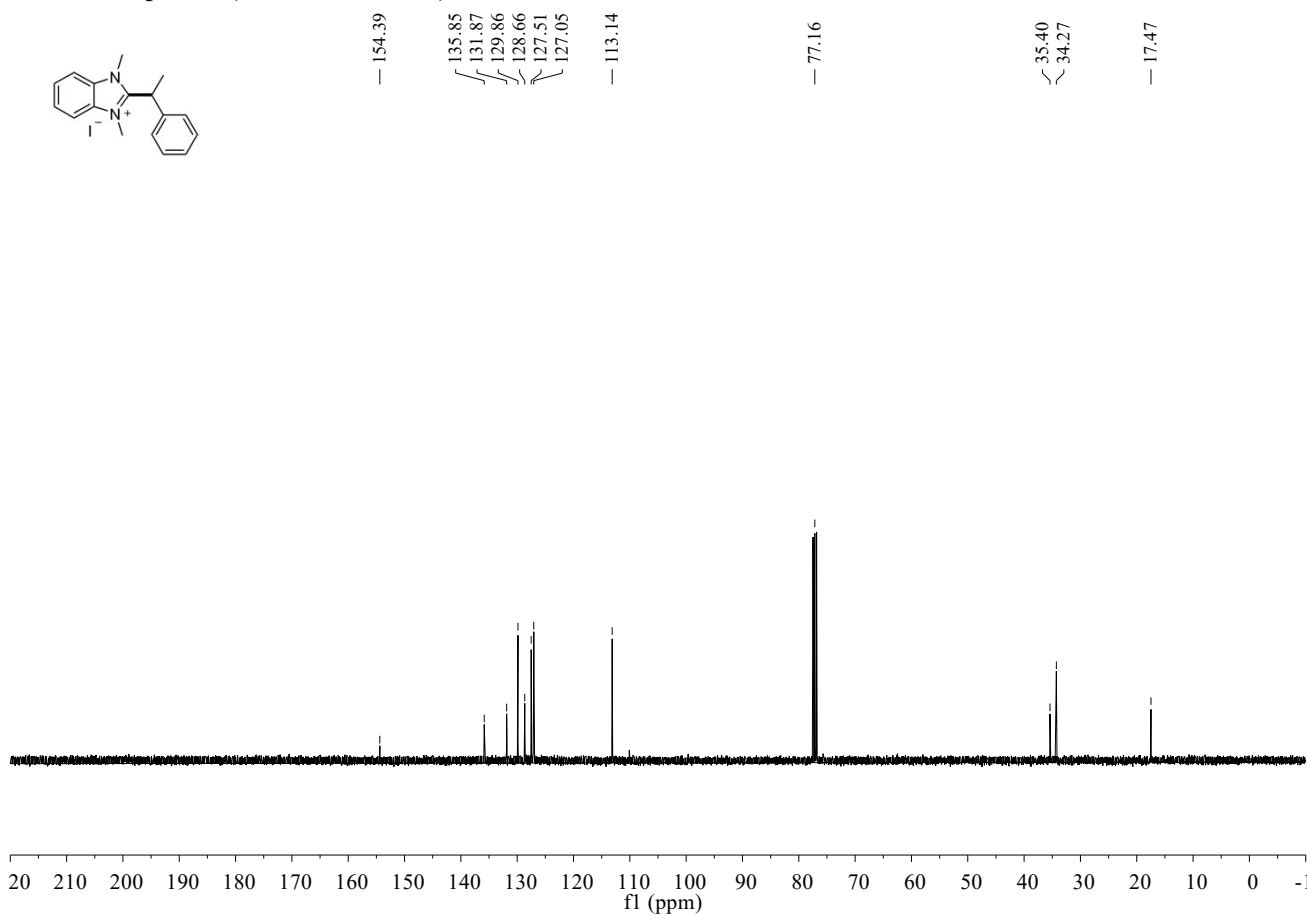

### <sup>1</sup>H NMR Spectra (400 MHz, CDCl<sub>3</sub>) of 6

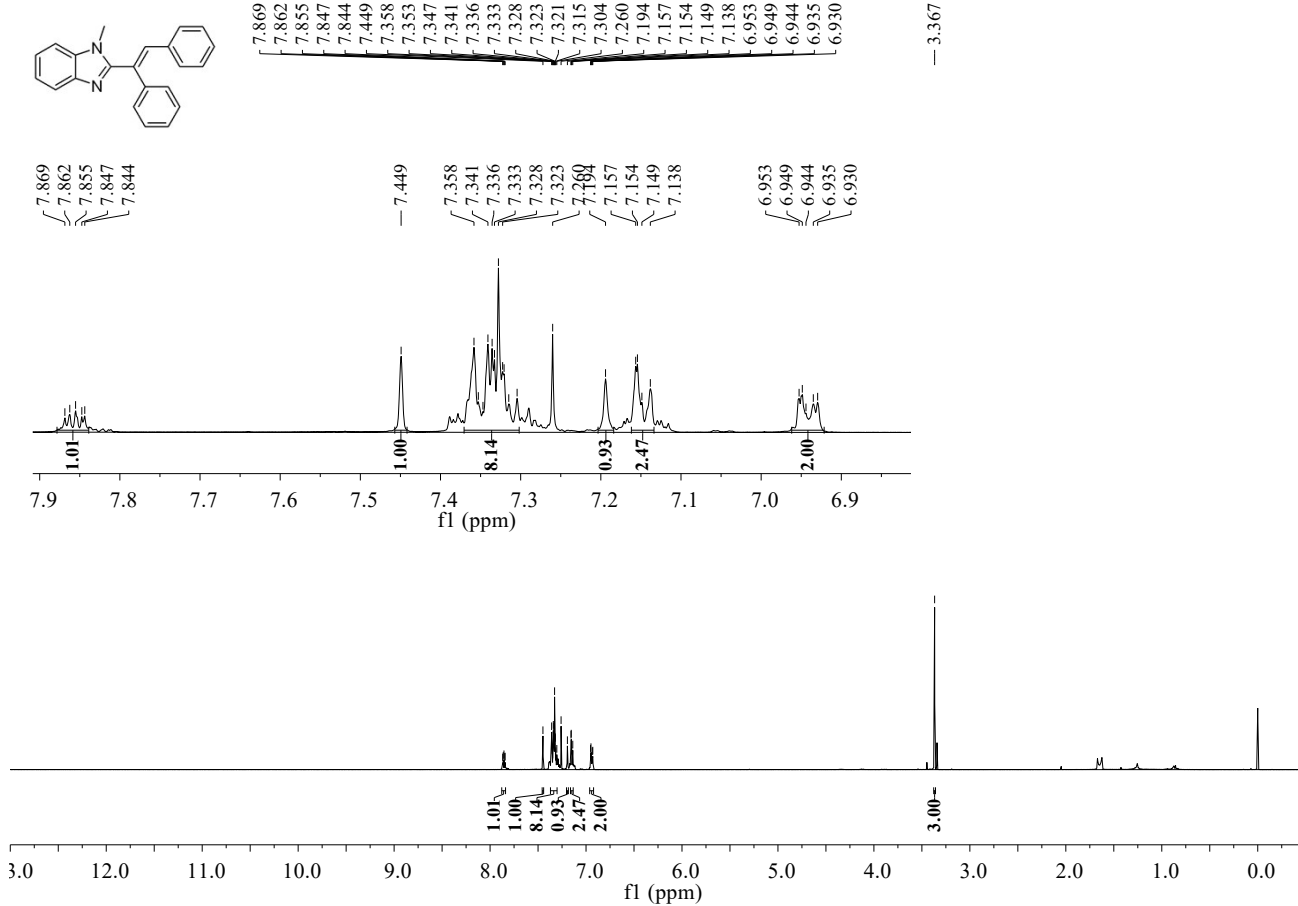

### <sup>1</sup>H-<sup>1</sup>H NOESY NMR Spectra (400 MHz, CDCl<sub>3</sub>) of 6

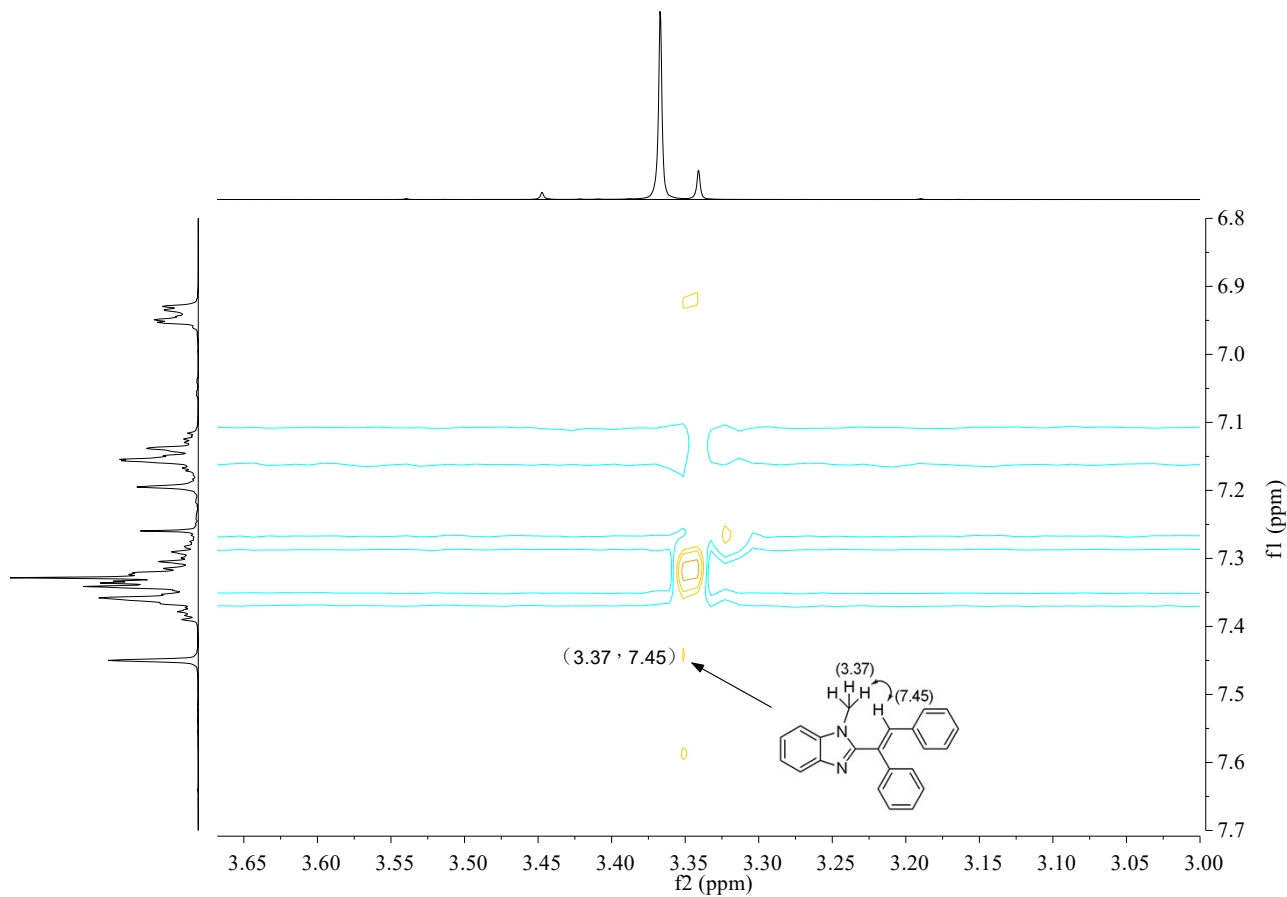

**<sup>13</sup>C NMR Spectra (100 MHz, CDCl<sub>3</sub>) of 6**

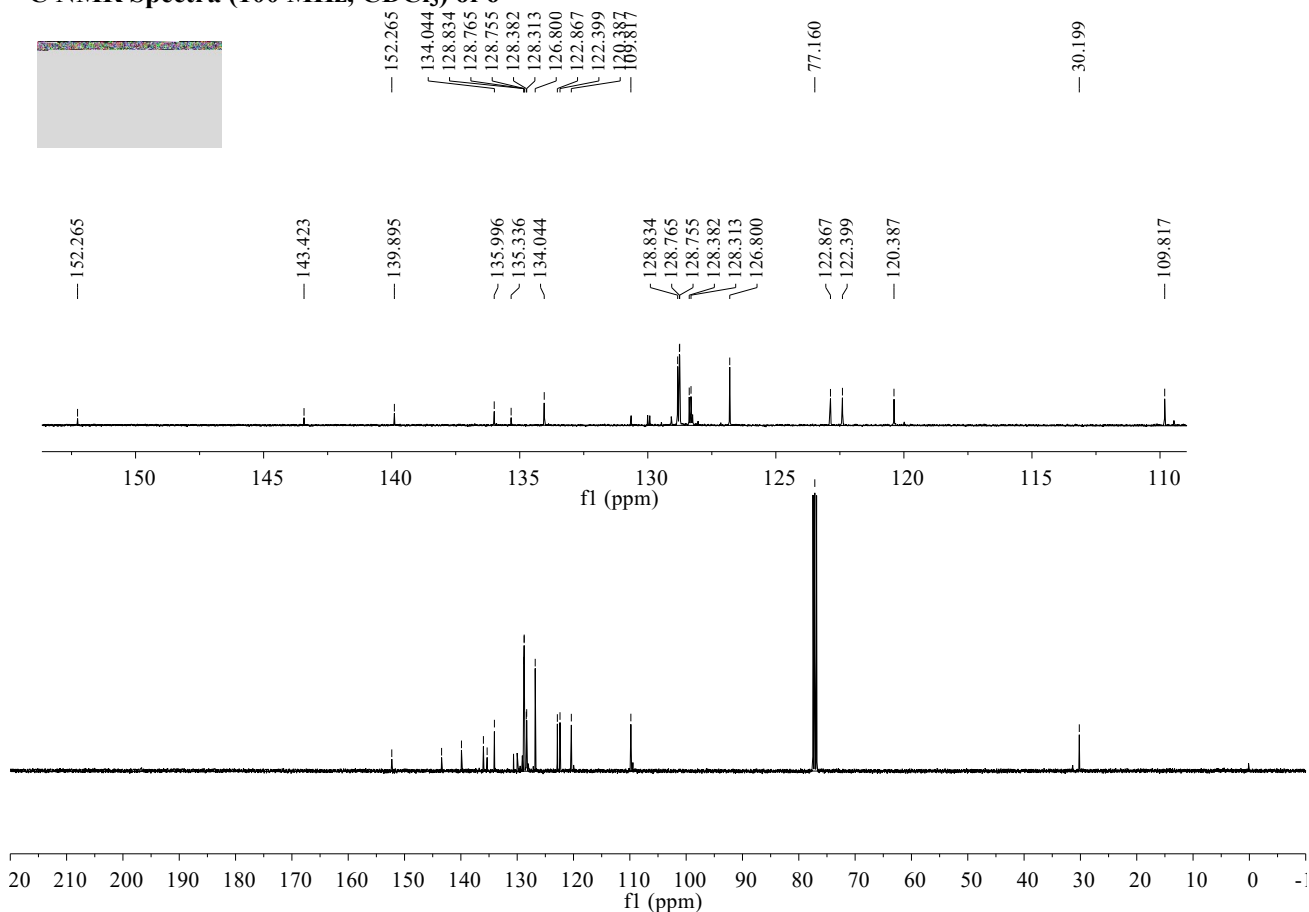

**<sup>1</sup>H NMR Spectra (400 MHz, CDCl<sub>3</sub>) of 7**

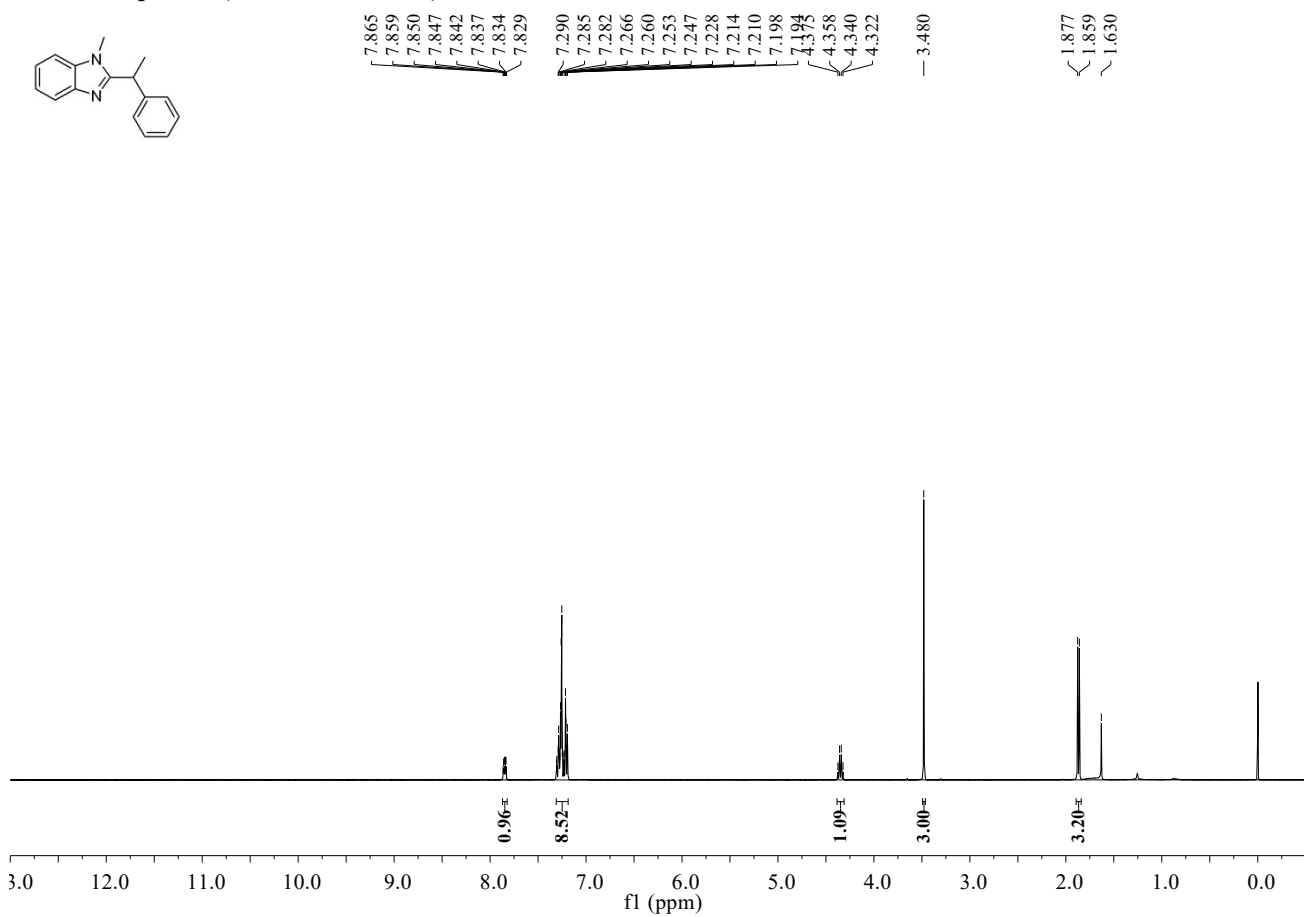

**<sup>13</sup>C NMR Spectra (100 MHz, CDCl<sub>3</sub>) of 7**

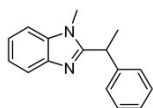

<sup>13</sup>C NMR chemical shifts (ppm):  
 156.88, 142.96, 142.42, 136.21, 129.04, 127.45, 127.00, 122.38, 121.88, 119.73, 109.00, 77.16, 39.11, 29.91, 21.83

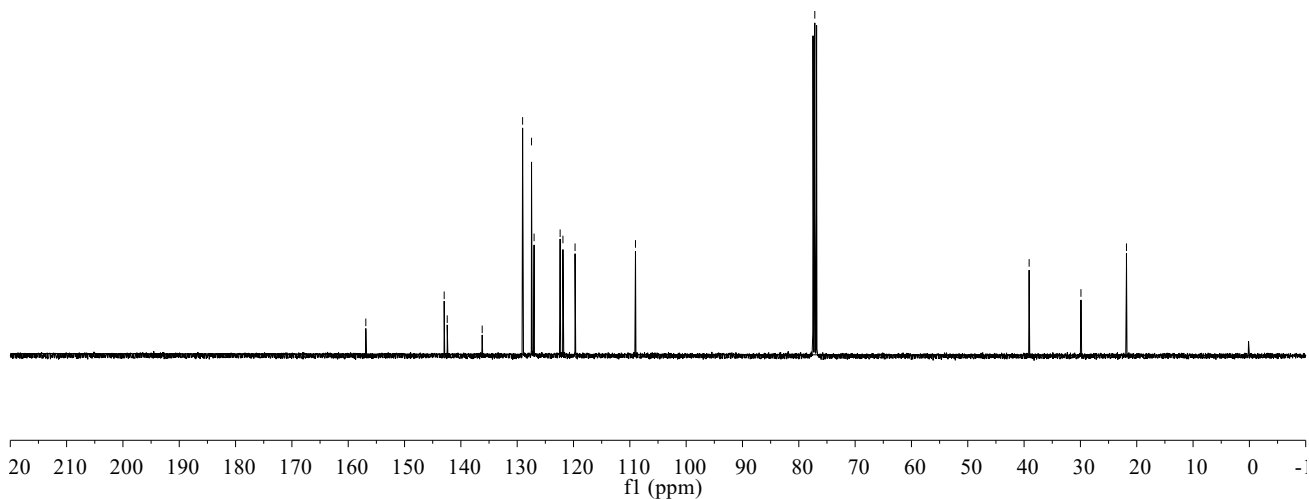

**<sup>1</sup>H NMR Spectra (400 MHz, CDCl<sub>3</sub>) of 8**

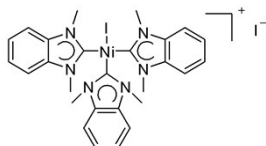

<sup>1</sup>H NMR chemical shifts (ppm):  
 7.451, 7.444, 7.436, 7.428, 7.396, 7.388, 7.381, 7.373, 7.314, 7.312, 7.303, 7.295, 7.288, 7.282, 7.280, 7.274, 7.267, 7.260, 4.489, 4.439, 1.628

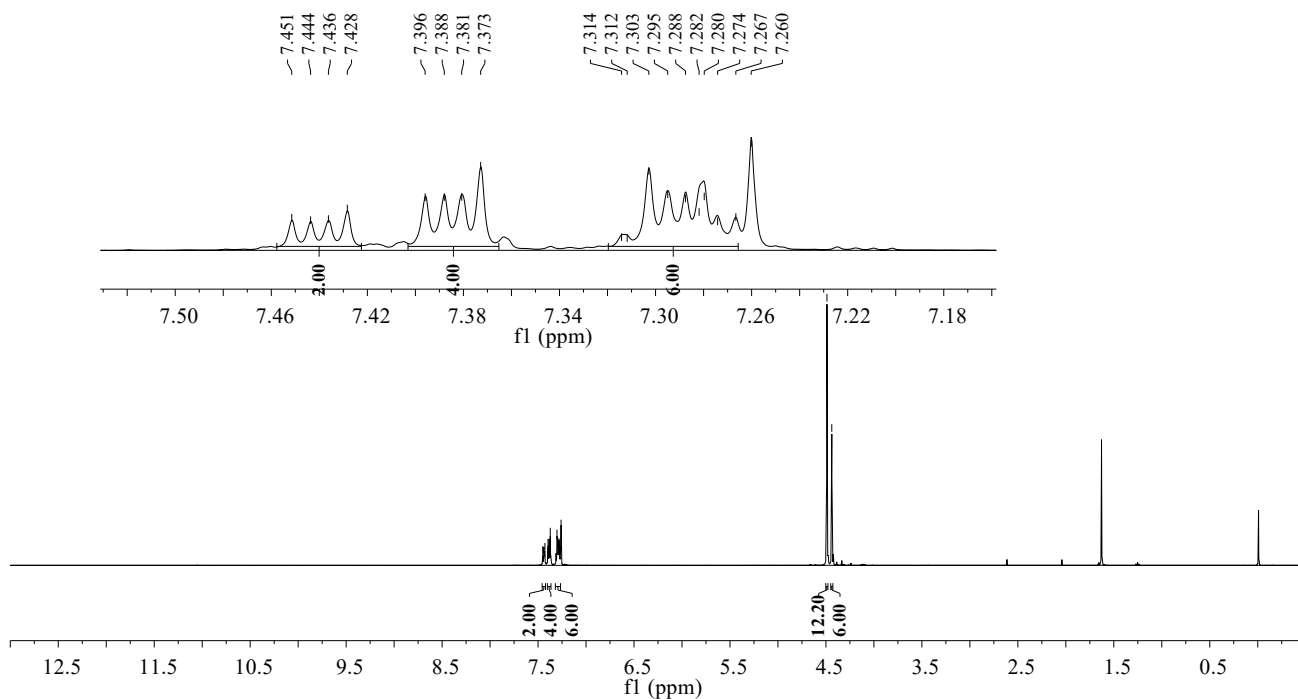

### <sup>13</sup>C NMR Spectra (100 MHz, CDCl<sub>3</sub>) of 8

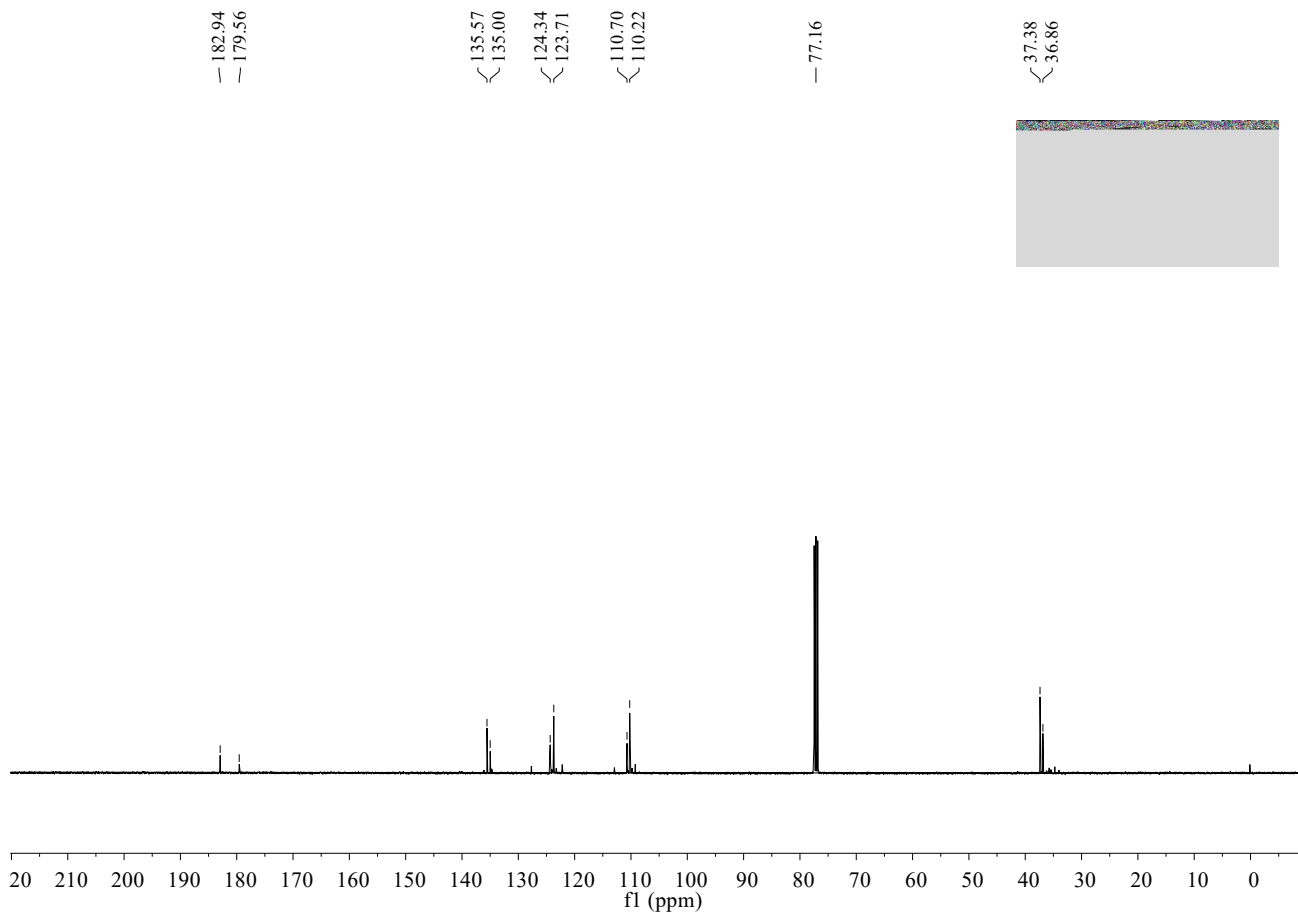

### <sup>1</sup>H NMR Spectra (400 MHz, CDCl<sub>3</sub>) of the mixture of 3s and 3s'

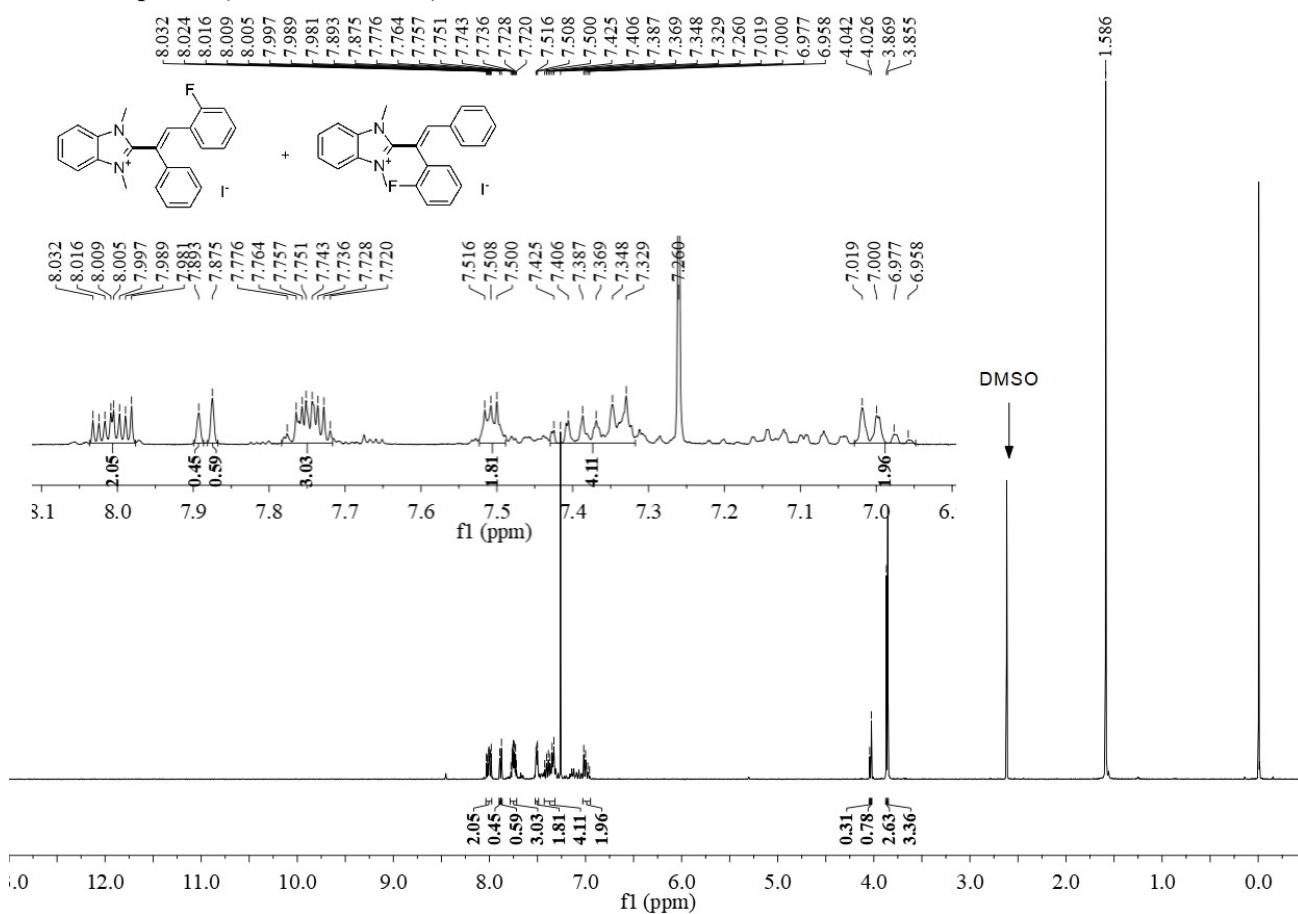

Supplement: d1cc07309e1.pdf [file d1cc07309e1.pdf]
